# Supplementary material
Source: PubMed Central journal article supplement (PMC5032627)
Supplement: NIHMS543186-supplement-Supporting_Information.pdf [file NIHMS543186-supplement-Supporting_Information.pdf]

## Supporting Information

### Table of Contents

|                                                                                              |     |
|----------------------------------------------------------------------------------------------|-----|
| General Methods .....                                                                        | S2  |
| Compound Synthesis and Characterization .....                                                | S2  |
| General Procedures for Reaction Screening .....                                              | S26 |
| Crystal data for 2-methoxy-4-(4,4,5,5-tetramethyl-1,3,2-dioxaborolan-2-yl)-benzenamine ..... | S31 |
| References .....                                                                             | S31 |
| $^1\text{H}$ and $^{13}\text{C}$ NMR .....                                                   | S32 |
| Theoretical Methods .....                                                                    | S95 |

**General Methods.** All reactions were conducted in a nitrogen filled glove-box. THF was distilled from sodium benzophenone solutions. All other solvents were used as received from Sigma-Aldrich (Sure/Seal<sup>TM</sup>) and were stored in the glovebox. All other commercially available materials were used as received. <sup>1</sup>H and <sup>13</sup>C NMR spectra were recorded on a Varian Inova-300 (300.11 and 75.47 MHz respectively), Varian VXR-500 or Varian Unity-500-Plus spectrometer (499.74 and 125.67 MHz respectively) and referenced to residual solvent signals. <sup>11</sup>B spectra were recorded on Varian VXR-500 or Varian Inova-300 operating at 160.41 and 96.29 MHz respectively, and were referenced to neat BF<sub>3</sub>·Et<sub>2</sub>O as the external standard. Elemental analyses were performed at Michigan State University using a Perkin Elmer Series II 2400 CHNS/O Analyzer. Melting points were measured on a MEL-TEMP® capillary melting apparatus and are uncorrected.

### 5, 3-(4,4,5,5-tetramethyl-1,3,2-dioxaborolan-2-yl)-indole (5)

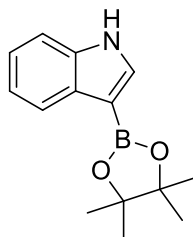

In a nitrogen filled glovebox, 117 mg indole (1 mmol) was dissolved in 1 mL THF in a 15 mL pressure tube containing a magnetic stir bar. 2.0 equiv HBpin (290  $\mu$ L) and 1.0 equiv NEt<sub>3</sub> (140  $\mu$ L) was added and the reaction vessel was sealed and heated at 80 °C for 10 min. 0.25  $\mu$ mol [Ir(OMe)COD]<sub>2</sub> (0.25 mol%) and 1.0  $\mu$ mol 3,4,7,8-tetramethyl-1,10-phenanthroline (1.0 mol%) were added and the reaction vessel was sealed and heated at 80 °C for 4 h. The reaction mixture was allowed to return to room temperature and the reaction mixture was exposed to air and diluted with 5 mL MeOH. The volatiles were then removed under reduced pressure, and the residue was dissolved in MTBE. The solution was passed through a short SiO<sub>2</sub> plug, which was washed with ~ 75 mL MTBE. Volatiles were removed under reduced pressure, and the product was crystallized from the residue using MeOH/H<sub>2</sub>O to afford a white solid (139 mg, 57% isolated yield); <sup>1</sup>H NMR (500 MHz, CDCl<sub>3</sub>)  $\delta$  8.47 (br s, 1H), 8.08 (dd,  $J$  = 7.3, 2.4 Hz, 2H), 7.65 (d,  $J$  = 2.4 Hz, 1H), 7.40 (dd,  $J$  = 7.4, 1.9 Hz, 1H), 7.23-7.18 (m, 2H), 1.37 (s, 12H); <sup>13</sup>C NMR (125 MHz, CDCl<sub>3</sub>)  $\delta$  136.0, 133.5, 131.9, 122.8, 83.0, 24.9; <sup>11</sup>B NMR (160 MHz, CDCl<sub>3</sub>)  $\delta$  30 (br s).<sup>1</sup>

### 3-(4,4,5,5-tetramethyl-1,3,2-dioxaborolan-2-yl)-1H-pyrrole (6)

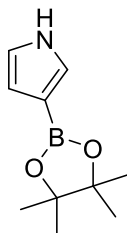

In a nitrogen filled glovebox, 69  $\mu\text{L}$  pyrrole (1 mmol) was dissolved in 1 mL THF in a 15 mL pressure tube containing a magnetic stir bar. 3.0 equiv HBpin (435  $\mu\text{L}$ ) and 1.0 equiv  $\text{NEt}_3$  (140  $\mu\text{L}$ ) was added and the reaction vessel was sealed and stirred at room temperature for 12 h. 0.25  $\mu\text{mol}$   $[\text{Ir}(\text{OMe})\text{COD}]_2$  (0.25 mol%) and 1.0  $\mu\text{mol}$  3,4,7,8-tetramethyl-1,10-phenanthroline (1.0 mol%) were added and the reaction vessel was sealed and heated at 80  $^\circ\text{C}$  for 4 h. The reaction mixture was allowed to return to room temperature and the reaction mixture was exposed to air and diluted with 5 mL MeOH. The volatiles were then removed under reduced pressure, and the residue was dissolved in MTBE. The solution was passed through a short  $\text{SiO}_2$  plug, which was washed with  $\sim 75$  mL MTBE. Volatiles were removed under reduced pressure, and the residue was crystallized from the residue using MeOH/ $\text{H}_2\text{O}$  to afford a white solid (185 mg, 76% isolated yield);  $^1\text{H}$  NMR (500 MHz,  $\text{CDCl}_3$ )  $\delta$  8.62 (br s, 1H), 7.24 (d, 2H), 6.85 (dd,  $J = 4.4, 2.5$  Hz, 1H), 6.57 (d,  $J = 1.4$  Hz, 1H), 1.33 (s, 12H);  $^{13}\text{C}$  NMR (125 MHz,  $\text{CDCl}_3$ )  $\delta$  127.0, 118.5, 113.8, 83.0, 24.9;  $^{11}\text{B}$  NMR (160 MHz,  $\text{CDCl}_3$ )  $\delta$  29 (br s).<sup>1,2</sup>

### 4-(4,4,5,5-tetramethyl-1,3,2-dioxaborolan-2-yl)-pyrazole (7)

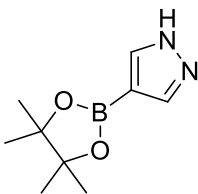

In a nitrogen filled glovebox, 68 mg pyrazole (1 mmol) was dissolved in 1 mL THF in a 15 mL pressure tube containing a magnetic stir bar. 0.25  $\mu\text{mol}$   $[\text{Ir}(\text{OMe})\text{COD}]_2$  (0.25 mol%), 1.0  $\mu\text{mol}$  3,4,7,8-tetramethyl-1,10-phenanthroline (1.0 mol%) and 2.0 equiv HBPin (290  $\mu\text{L}$ ) were added and the reaction vessel was sealed and heated at 80  $^\circ\text{C}$  for 4 h. The reaction mixture was allowed to return to room temperature and the reaction mixture was exposed to air and diluted with 5 mL MeOH. The volatiles were then removed under reduced pressure, and the residue was dissolved in MTBE. The solution was passed through a short  $\text{SiO}_2$  plug, which was washed with  $\sim 75$  mL MTBE. Removal of the solvent under reduced pressure gave the product as a white solid (171 mg, 88% isolated yield);  $^1\text{H}$  NMR (500 MHz,

CDCl<sub>3</sub>) δ 7.90 (s, 1H), 7.81 (s, 1H), 4.75 (br s, 1H), 1.35 (s, 12H); <sup>13</sup>C NMR (125 MHz, CDCl<sub>3</sub>) δ 133.9, 83.8, 24.9; <sup>11</sup>B NMR (160 MHz, CDCl<sub>3</sub>) δ 30 (br s).<sup>1</sup>

### 3-(4,4,5,5-tetramethyl-1,3,2-dioxaborolan-2-yl)-4-azaindole (8)

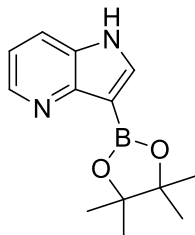

In a nitrogen filled glovebox, 188 mg 4-azaindole (1 mmol) was dissolved in 1 mL THF in a 15 mL pressure tube containing a magnetic stir bar. 0.25 μmol [Ir(OMe)COD]<sub>2</sub> (0.25 mol%), 1.0 μmol 3,4,7,8-tetramethyl-1,10-phenanthroline (1.0 mol%) and 2.0 equiv HBPIn (290 μL) were added and the reaction vessel was sealed and heated at 80 °C for 4 h. The reaction mixture was allowed to return to room temperature and the reaction mixture was exposed to air and diluted with 5 mL MeOH. The volatiles were then removed under reduced pressure, and the residue was dissolved in MTBE. The solution was passed through a short SiO<sub>2</sub> plug, which was washed with ~ 75 mL MTBE. Removal of the solvent under reduced pressure gave the product as a white solid (202 mg, 83% isolated yield); <sup>1</sup>H NMR (500 MHz, DMSO-d<sub>6</sub>) δ 11.39 (br s, 1H), 8.51 (s, 1H), 7.97 (s, 1H), 7.71 (dd, *J* = 5.9, 3.0 Hz, 1H), 6.54 (s, 1H), 1.30 (s, 12H); <sup>13</sup>C NMR (125 MHz, DMSO-d<sub>6</sub>) δ 148.5, 148.0, 131.3, 128.3, 124.8, 102.2, 84.0, 25.1; HRMS (ESI) *m/z* calcd for C<sub>13</sub>H<sub>17</sub>BN<sub>2</sub>O<sub>2</sub> [M + H]<sup>+</sup> 245.1461, found 245.1456.

### 3-(4,4,5,5-tetramethyl-1,3,2-dioxaborolan-2-yl)-7-azaindole (9)

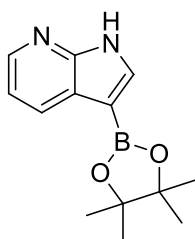

In a nitrogen filled glovebox, 188 mg 7-azaindole (1 mmol) was dissolved in 1 mL THF in a 15 mL pressure tube containing a magnetic stir bar. 0.25 μmol [Ir(OMe)COD]<sub>2</sub> (0.25 mol%), 1.0 μmol 3,4,7,8-tetramethyl-1,10-phenanthroline (1.0 mol%) and 2.0 equiv HBPIn (290 μL) were added and the reaction vessel was sealed and heated at 80 °C for 4 h. The reaction mixture was allowed to return to room temperature and the reaction mixture was exposed to air and diluted with 5 mL MeOH. The volatiles were then removed under reduced pressure, and the residue was dissolved in MTBE. The solution was passed through a short SiO<sub>2</sub> plug, which was washed with ~ 75 mL MTBE. Volatiles were removed under

reduced pressure, and the product was crystallized from the residue using MeOH/H<sub>2</sub>O to afford a white solid (185 mg, 76% isolated yield); <sup>1</sup>H NMR (500 MHz, CDCl<sub>3</sub>) δ 11.36 (br s, 1H), 8.32 (m, 2H), 7.84 (s, 1H), 7.14 (dd, *J* = 7.3, 4.9 Hz, 1H), 1.37 (s, 12H); <sup>13</sup>C NMR (125 MHz, CDCl<sub>3</sub>) δ 149.9, 142.5, 134.8, 130.9, 124.4, 116.5, 83.0, 24.9; <sup>11</sup>B NMR (160 MHz, CDCl<sub>3</sub>) δ 29 (br s).

### 3,5-bis(4,4,5,5-tetramethyl-1,3,2-dioxaborolan-2-yl)-7-azaindole (10)

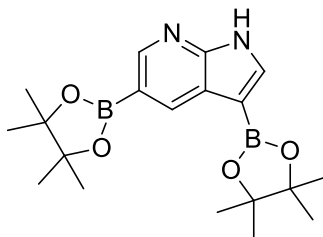

In a nitrogen filled glovebox, 188 mg 7-azaindole (1 mmol) was dissolved in 1 mL THF in a 15 mL pressure tube containing a magnetic stir bar. 0.25 μmol [Ir(OMe)COD]<sub>2</sub> (0.25 mol%), 1.0 μmol 3,4,7,8-tetramethyl-1,10-phenanthroline (1.0 mol%) and 2.0 equiv B<sub>2</sub>Pin<sub>2</sub> (508 mg) were added and the reaction vessel was sealed and heated at 80 °C for 4 h. The reaction mixture was allowed to return to room temperature and the reaction mixture was exposed to air and diluted with 5 mL MeOH. The volatiles were then removed under reduced pressure, and the residue was dissolved in MTBE. The solution was passed through a short SiO<sub>2</sub> plug, which was washed with ~ 75 mL MTBE. Volatiles were removed under reduced pressure, and the product was crystallized from the residue using MeOH/H<sub>2</sub>O to afford a white solid (332 mg, 91% isolated yield); mp: 209-210 °C; <sup>1</sup>H NMR (500 MHz, CDCl<sub>3</sub>) δ 11.7 (s, 1H), 8.73 (d, *J* = 1.5 Hz, 1H), 8.68 (d, *J* = 1.5 Hz, 1H), 7.83 (s, 1H), 1.40 (s, 12H), 1.38 (s, 12H); <sup>13</sup>C NMR (125 MHz, CDCl<sub>3</sub>) δ 151.5, 149.3, 137.6, 134.9, 123.4, 83.8, 83.1, 24.9; <sup>11</sup>B NMR (160 MHz, CDCl<sub>3</sub>) δ 31; HRMS (ESI) *m/z* calcd for C<sub>19</sub>H<sub>28</sub>B<sub>2</sub>N<sub>2</sub>O<sub>4</sub> [M + H]<sup>+</sup> 371.2320, found 371.2509.

### 4-bromo-2-(4,4,5,5-tetramethyl-1,3,2-dioxaborolan-2-yl)-benzenamine (11a)

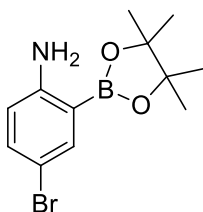

In a nitrogen filled glovebox, 170 mg 4-bromoaniline (1.0 mmol, 1.0 equiv) was dissolved in 1 mL THF in a 15 mL pressure tube containing a magnetic stir bar. 1.5 equiv HBPIn (218 μL) was added and the reaction vessel was sealed and stirred at room temperature for 1 h. 0.25 μmol [Ir(OMe)COD]<sub>2</sub> (0.25 mol%) and 1.0 μmol 3,4,7,8-tetramethyl-1,10-phenanthroline (1.0 mol%) were added followed by an

additional 1.5 equiv HBPIn (218  $\mu$ L) and the reaction vessel was sealed and heated at 80  $^{\circ}$ C for 16 h. The reaction mixture was allowed to return to room temperature and the reaction mixture was exposed to air and diluted with 5 mL MeOH. The volatiles were then removed under reduced pressure, and the residue was dissolved in MTBE. The solution was passed through a short SiO<sub>2</sub> plug, which was washed with  $\sim$  75 mL MTBE. Volatiles were removed under reduced pressure, and the product was crystallized from the residue using MeOH/H<sub>2</sub>O to afford a white solid (246 mg, 88% yield); mp: 101-102  $^{\circ}$ C; <sup>1</sup>H NMR (500 MHz, CD<sub>2</sub>Cl<sub>2</sub>)  $\delta$  7.62 (d, *J* = 2.5 Hz, 1H), 7.27 (dd, *J* = 8.8, 2.5 Hz, 1H), 6.53 (d, *J* = 8.3 Hz, 1H), 4.85 (br s, 2H), 1.34 (s, 12H); <sup>13</sup>C NMR (125 MHz, CD<sub>2</sub>Cl<sub>2</sub>)  $\delta$  152.5, 138.5, 135.0, 116.5, 108.1, 83.9, 24.6; <sup>11</sup>B NMR (160 MHz, CD<sub>2</sub>Cl<sub>2</sub>)  $\delta$  30 (br s); HRMS (ESI) *m/z* calcd for C<sub>12</sub>H<sub>17</sub>BBrNO<sub>2</sub> [M + H]<sup>+</sup> 298.0614, found 298.0609.

#### 4-bromo-5-chloro-2-(4,4,5,5-tetramethyl-1,3,2-dioxaborolan-2-yl)-benzamine (11b)

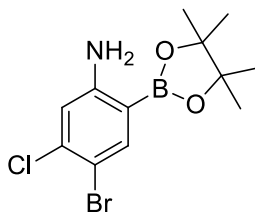

In a nitrogen filled glovebox, 206 mg 4-bromo-3-chloroaniline (1.0 mmol, 1.0 equiv) was dissolved in 1 mL THF in a 15 mL pressure tube containing a magnetic stir bar. 1.5 equiv HBPIn (218  $\mu$ L) was added and the reaction vessel was sealed and stirred at room temperature for 1 h. 0.25  $\mu$ mol [Ir(OMe)COD]<sub>2</sub> (0.25 mol%) and 1.0  $\mu$ mol 3,4,7,8-tetramethyl-1,10-phenanthroline (1.0 mol%) were added followed by an additional 1.5 equiv HBPIn (218  $\mu$ L) and the reaction vessel was sealed and heated at 80  $^{\circ}$ C for 16 h. The reaction mixture was allowed to return to room temperature and the reaction mixture was exposed to air and diluted with 5 mL MeOH. The volatiles were then removed under reduced pressure, and the residue was dissolved in MTBE. The solution was passed through a short SiO<sub>2</sub> plug, which was washed with  $\sim$  75 mL MTBE. Volatiles were removed under reduced pressure, and the product was crystallized from the residue using MeOH/H<sub>2</sub>O to afford a white solid (305 mg, 92% yield); mp: 79-81  $^{\circ}$ C; <sup>1</sup>H NMR (500 MHz, CDCl<sub>3</sub>)  $\delta$  7.76 (s, 1H), 6.70 (s, 1H), 4.80 (br s, 2H), 1.33 (s, 12H); <sup>13</sup>C NMR (125 MHz, CDCl<sub>3</sub>)  $\delta$  153.3, 141.0, 138.0, 116.0, 108.4, 84.0, 24.9; <sup>11</sup>B NMR (160 MHz, CDCl<sub>3</sub>)  $\delta$  30 (br s); HRMS (ESI) *m/z* calcd for C<sub>12</sub>H<sub>17</sub>BBrClNO<sub>2</sub> [M + H]<sup>+</sup> 332.0224, found 332.0222.

#### 4-amino-2-chloro-5-(4,4,5,5-tetramethyl-1,3,2-dioxaborolan-2-yl)-phenol (11c)

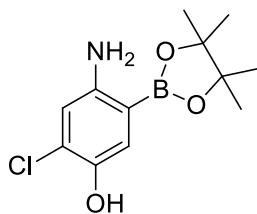

In a nitrogen filled glovebox, 109 mg 4-aminophenol (1.0 mmol, 1.0 equiv) was dissolved in 1 mL THF in a 15 mL pressure tube containing a magnetic stir bar. 4.0 equiv HBPin (580  $\mu$ L) was added and the reaction vessel was sealed and stirred at room temperature for 1 h. 0.25  $\mu$ mol [Ir(OMe)COD]<sub>2</sub> (0.25 mol%) and 1.0  $\mu$ mol 3,4,7,8-tetramethyl-1,10-phenanthroline (1.0 mol%) were added and the reaction vessel was sealed and heated at 80 °C for 16 h. The reaction mixture was allowed to return to room temperature and the reaction mixture was exposed to air and diluted with 5 mL MeOH. The volatiles were then removed under reduced pressure, and the residue was dissolved in MTBE. The solution was passed through a short SiO<sub>2</sub> plug, which was washed with ~ 75 mL MTBE. Volatiles were removed under reduced pressure, and the product was crystallized from the residue using DCM/hexanes to afford a white solid (170 mg, 63% isolated yield); <sup>1</sup>H NMR (500 MHz, CDCl<sub>3</sub>)  $\delta$  7.36 (s, H), 6.61 (s, 1H), 4.84 (br s, 1H), 4.40 (br s, 2H), 1.33 (s, 12H); <sup>13</sup>C NMR (125 MHz, CDCl<sub>3</sub>)  $\delta$  147.8, 142.8, 124.5, 123.1, 115.0, 83.8, 24.9; <sup>11</sup>B NMR (160 MHz, CDCl<sub>3</sub>)  $\delta$  30 (br s); HRMS (ESI) m/z calcd for C<sub>12</sub>H<sub>17</sub>BClNO<sub>3</sub> [M + H]<sup>+</sup> 270.1068, found 270.1066.

#### 2-(4,4,5,5-tetramethyl-1,3,2-dioxaborolan-2-yl)-4-(trifluoromethyl)-benzenamine (11d)

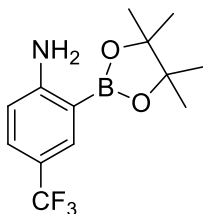

In a nitrogen filled glovebox, 161 mg of 4-(trifluoromethyl)aniline (1.0 mmol, 1.0 equiv) was dissolved in 1 mL THF in a 15 mL pressure tube containing a magnetic stir bar. 1.5 equiv HBpin (218  $\mu$ L) was added and the reaction vessel was sealed and stirred at room temperature for 1 h. 0.25  $\mu$ mol [Ir(OMe)COD]<sub>2</sub> (0.25 mol%) and 1.0  $\mu$ mol 3,4,7,8-tetramethyl-1,10-phenanthroline (1.0 mol%) were added followed by an additional 1.5 equiv HBpin (218  $\mu$ L) and the reaction vessel was sealed and heated at 80 °C for 16 h. The reaction mixture was allowed to return to room temperature and the reaction mixture was exposed to air and diluted with 5 mL MeOH. The volatiles were then removed under reduced pressure, and the residue was dissolved in MTBE. The solution was passed through a short SiO<sub>2</sub> plug, which was washed

with ~ 75 mL MTBE. Volatiles were removed under reduced pressure, and the product was crystallized from the residue using MeOH/H<sub>2</sub>O to afford a white solid (250 mg, 87% yield); mp: 110-113 °C; <sup>1</sup>H NMR (500 MHz, CDCl<sub>3</sub>) δ 7.86 (s, 1H), 7.42 (dd, *J* = 8.3, 2.0, 1H), 6.61 (d, *J* = 8.4 Hz, 1H), 5.05 (br s, 2H), 1.35 (s, 12H); <sup>13</sup>C NMR (125 MHz, CDCl<sub>3</sub>) δ 151.2, 129.5, 124.7, 120.2 (q, 270.8), 113.9 (q, 32.5), 109.4, 79.2, 20.1; <sup>19</sup>F NMR (470 MHz, CDCl<sub>3</sub>) δ -65.9; <sup>11</sup>B NMR (160 MHz, CDCl<sub>3</sub>) δ 30 (br s); HRMS (ESI) *m/z* calcd for C<sub>13</sub>H<sub>17</sub>BF<sub>3</sub>NO<sub>2</sub> [M + H]<sup>+</sup> 288.1385, found 288.1389.<sup>3</sup>

#### 4-chloro-5-fluoro-2-(4,4,5,5-tetramethyl-1,3,2-dioxaborolan-2-yl)-benzamine (11e)

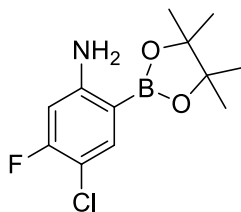

In a nitrogen filled glovebox, 145 mg 4-chloro-3-fluoroaniline (1.0 mmol, 1.0 equiv) was dissolved in 1 mL THF in a 15 mL pressure tube containing a magnetic stir bar. 1.5 equiv HBPIn (218 μL) was added and the reaction vessel was sealed and stirred at room temperature for 1 h. 0.25 μmol [Ir(OMe)COD]<sub>2</sub> (0.25 mol%) and 1.0 μmol 3,4,7,8-tetramethyl-1,10-phenanthroline (1.0 mol%) were added followed by an additional 1.5 equiv HBPIn (218 μL) and the reaction vessel was sealed and heated at 80 °C for 16 h. The reaction mixture was allowed to return to room temperature and the reaction mixture was exposed to air and diluted with 5 mL MeOH. The volatiles were then removed under reduced pressure, and the residue was dissolved in MTBE. The solution was passed through a short SiO<sub>2</sub> plug, which was washed with ~ 75 mL MTBE. 8% of the isomer where borylation occurred ortho to F was observed by <sup>1</sup>H NMR, but it was not isolated. The 2-borylated product isolated was isolated by recrystallization from MeOH/H<sub>2</sub>O, which gave a white solid (244 mg, 90% isolated yield); mp: 95-96 °C; <sup>1</sup>H NMR (500 MHz, CDCl<sub>3</sub>) δ 7.58 (d, *J* = 9.3 Hz, 1H), 6.36 (d, *J* = 11.2 Hz, 1H), 4.84 (br s, 2H), 1.33 (s, 12H); <sup>13</sup>C NMR (125 MHz, CDCl<sub>3</sub>) δ 161.9 (d, *J* = 249.8 Hz), 154.0 (d, *J* = 10.5 Hz), 138.4 (d, *J* = 2.9 Hz), 125.5, 102.4 (d, *J* = 23.9 Hz), 83.9, 24.9; <sup>19</sup>F NMR (470 MHz, CDCl<sub>3</sub>) δ 110.9 (t, *J* = 10 Hz); <sup>11</sup>B NMR (160 MHz, CDCl<sub>3</sub>) δ 30 (br s); HRMS (ESI) *m/z* calcd for C<sub>12</sub>H<sub>16</sub>BClFNO<sub>2</sub> [M + H]<sup>+</sup> 272.1025, found 272.1019.

#### 4-amino-3-(4,4,5,5-tetramethyl-1,3,2-dioxaborolan-2-yl)benzonitrile (11f)

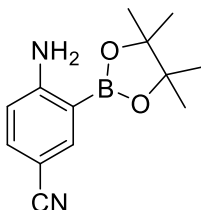



In a nitrogen filled glovebox, 118 mg 4-aminobenzonitrile (1.0 mmol, 1.0 equiv) was dissolved in 1 mL *n*-hexane in a 15 mL pressure tube containing a magnetic stir bar. 2.0 equiv HBPIn (290  $\mu$ L) was added and the reaction vessel was sealed and stirred at room temperature for 1 h. 1.5  $\mu$ mol [Ir(OMe)COD]<sub>2</sub> (1.5 mol%) and 3.0  $\mu$ mol N<sup>4</sup>,N<sup>4</sup>,N<sup>4'</sup>,N<sup>4'</sup>-tetramethyl-[2,2'-bipyridine]-4,4'-diamine (3.0 mol%) were added and the reaction vessel was sealed and heated at 80 °C for 16 h. The reaction mixture was allowed to return to room temperature and the reaction mixture was exposed to air and diluted with 5 mL MeOH. The volatiles were then removed under reduced pressure, and the residue was dissolved in MTBE. The solution was passed through a short SiO<sub>2</sub> plug, which was washed with ~ 75 mL MTBE. Volatiles were removed under reduced pressure, and the product was crystallized from the residue using MeOH/H<sub>2</sub>O to afford a white solid (146 mg, 60% isolated yield, (83% assay yield by <sup>1</sup>H NMR); mp: 96-97 °C; <sup>1</sup>H NMR (500 MHz, CDCl<sub>3</sub>)  $\delta$  7.92 (d, *J* = 2.0 Hz, 1H), 7.43 (dd, *J* = 8.8, 2.0 Hz, 1H), 6.57 (d, *J* = 8.8 Hz, 1H), 5.27 (br s, 2H), 1.37 (s, 12H); <sup>13</sup>C NMR (125 MHz, CDCl<sub>3</sub>)  $\delta$  156.5, 141.9, 135.9, 120.2, 114.5, 99.0, 84.2, 24.9; <sup>11</sup>B NMR (160 MHz, CDCl<sub>3</sub>)  $\delta$  30 (br s); HRMS (ESI) *m/z* calcd for C<sub>13</sub>H<sub>17</sub>BN<sub>2</sub>O<sub>2</sub> [M + H]<sup>+</sup> 245.1464, found 245.1594.

**4-amino-3-(4,4,5,5-tetramethyl-1,3,2-dioxaborolan-2yl)-phenol (11g)**

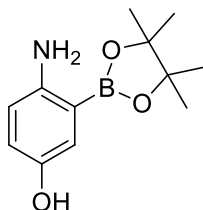

In a nitrogen filled glovebox, 109 mg 4-aminophenol (1.0 mmol, 1.0 equiv) was dissolved in 1 mL THF in a 15 mL pressure tube containing a magnetic stir bar. 4.0 equiv HBPIn (580  $\mu$ L) was added and the reaction vessel was sealed and stirred at room temperature for 1 h. 0.25  $\mu$ mol [Ir(OMe)COD]<sub>2</sub> (0.25 mol%) and 1.0  $\mu$ mol 3,4,7,8-tetramethyl-1,10-phenanthroline (1.0 mol%) were added and the reaction vessel was sealed and heated at 80 °C for 16 h. The reaction mixture was allowed to return to room temperature and the reaction mixture was exposed to air and diluted with 5 mL MeOH. The volatiles were then removed under reduced pressure, the residue was dissolved in DCM, and the solution was passed through a short SiO<sub>2</sub> plug, which was washed with ~ 75 mL DCM. Volatiles were removed under reduced pressure, and the product was crystallized from the residue using DCM/hexanes to afford a white solid (165 mg, 70% yield); <sup>1</sup>H NMR (500 MHz, CDCl<sub>3</sub>)  $\delta$  7.06 (d, *J* = 2.9 Hz, 1H), 6.78 (dd, *J* = 8.3, 3.0 Hz, 1H), 6.53 (d, *J* = 8.3 Hz, 1H), 4.44 (br s, 3H), 1.33 (s, 12H); <sup>13</sup>C NMR (125 MHz, CDCl<sub>3</sub>)  $\delta$  147.6, 147.0, 121.9, 120.6, 116.5, 83.7, 24.9; <sup>11</sup>B NMR (160 MHz, CDCl<sub>3</sub>)  $\delta$  30 (br s); HRMS (ESI) *m/z* calcd for C<sub>12</sub>H<sub>18</sub>BNO<sub>3</sub> [M + H]<sup>+</sup> 236.1414, found 236.1413.

#### 4-methoxy-2-(4,4,5,5-tetramethyl-1,3,2-dioxaborolan-2-yl)-benzenamine (11h)

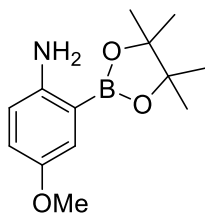

In a nitrogen filled glovebox, 115  $\mu\text{L}$  *p*-anisidine (1.0 mmol, 1.0 equiv) was dissolved in 1 mL THF in a 15 mL pressure tube containing a magnetic stir bar. 1.5 equiv HBPIn (218  $\mu\text{L}$ ) was added and the reaction vessel was sealed and stirred at room temperature for 1 h. 0.25  $\mu\text{mol}$   $[\text{Ir}(\text{OMe})\text{COD}]_2$  (0.25 mol%) and 1.0  $\mu\text{mol}$  3,4,7,8-tetramethyl-1,10-phenanthroline (1.0 mol%) were added followed by an additional 1.5 equiv HBPIn (218  $\mu\text{L}$ ) and the reaction vessel was sealed and heated at 80  $^\circ\text{C}$  for 16 h. The reaction mixture was allowed to return to room temperature and the reaction mixture was exposed to air and diluted with 5 mL MeOH. The volatiles were then removed under reduced pressure, and the residue was dissolved in MTBE. The solution was passed through a short  $\text{SiO}_2$  plug, which was washed with  $\sim 75$  mL MTBE to give a pale red solid (157 mg, 63% yield); mp: 73-74  $^\circ\text{C}$ ;  $^1\text{H}$  NMR (500 MHz,  $\text{C}_6\text{D}_6$ )  $\delta$  7.60 (d,  $J = 2.9$  Hz, 1H), 6.94 (dd,  $J = 8.3, 2.9$  Hz, 1H), 6.53 (d,  $J = 8.8$  Hz, 1H), 4.31 (br s, 2H), 3.37 (s, 3H), 1.03 (s, 12H);  $^{13}\text{C}$  NMR (125 MHz,  $\text{CDCl}_3$ )  $\delta$  147.9, 133.9, 120.6, 119.6, 116.5, 83.8, 56.0, 24.9;  $^{11}\text{B}$  NMR (160 MHz,  $\text{CDCl}_3$ )  $\delta$  31 (br s); HRMS (ESI)  $m/z$  calcd for  $\text{C}_{13}\text{H}_{20}\text{BNO}_3$   $[\text{M} + \text{H}]^+$  250.1617, found 250.1616.

#### 4-chloro-2-(4,4,5,5-tetramethyl-1,3,2-dioxaborolan-2-yl)-benzenamine (11i)

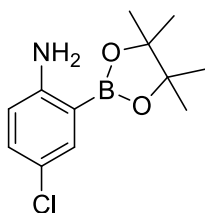

In a nitrogen filled glovebox, 128 mg 4-chloroaniline (1.0 mmol, 1.0 equiv) was dissolved in 1 mL THF in a 15 mL pressure tube containing a magnetic stir bar. 1.5 equiv HBPIn (218  $\mu\text{L}$ ) was added and the reaction vessel was sealed and stirred at room temperature for 1 h. 0.25  $\mu\text{mol}$   $[\text{Ir}(\text{OMe})\text{COD}]_2$  (0.25 mol%) and 1.0  $\mu\text{mol}$  3,4,7,8-tetramethyl-1,10-phenanthroline (1.0 mol%) were added followed by an additional 1.5 equiv HBPIn (218  $\mu\text{L}$ ) and the reaction vessel was sealed and heated at 80  $^\circ\text{C}$  for 16 h. The reaction mixture was allowed to return to room temperature and the reaction mixture was exposed to air and diluted with 5 mL MeOH. The volatiles were then removed under reduced pressure, and the residue was dissolved in MTBE. The solution was passed through a short  $\text{SiO}_2$  plug, which was washed with  $\sim 75$  mL MTBE. Volatiles were removed under reduced pressure, and the product was crystallized from the

residue using MeOH/H<sub>2</sub>O to afford a white solid (236 mg, 93% yield); mp: 91-93 °C; <sup>1</sup>H NMR (500 MHz, CDCl<sub>3</sub>) δ 7.54 (d, *J* = 2.5 Hz, 1H), 7.14 (dd, *J* = 8.8, 2.5 Hz, 1H), 6.53 (d, *J* = 8.8 Hz, 1H), 4.69 (br s, 2H), 1.33 (s, 12H); <sup>13</sup>C NMR (125 MHz, CDCl<sub>3</sub>) δ 152.0, 135.8, 132.4, 121.6, 116.2, 83.9, 24.9; <sup>11</sup>B NMR (160 MHz, CDCl<sub>3</sub>) δ 30 (br s); HRMS (ESI) *m/z* calcd for C<sub>12</sub>H<sub>17</sub>BClNO<sub>2</sub> [M + H]<sup>+</sup> 254.1119, found 254.1116.

#### 4-amino-2-chloro-5-(4,4,5,5-tetramethyl-1,3,2-dioxaborolan-2-yl)-benzonitrile (11j)

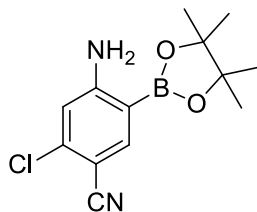

In a nitrogen filled glovebox, 152 mg 4-amino-2-chlorobenzonitrile (1.0 mmol, 1.0 equiv) was dissolved in 1 mL THF in a 15 mL pressure tube containing a magnetic stir bar. 1.5 equiv HBPin (218 μL) was added and the reaction vessel was sealed and stirred at room temperature for 1 h. 0.25 μmol [Ir(OMe)COD]<sub>2</sub> (0.25 mol%) and 1.0 μmol 3,4,7,8-tetramethyl-1,10-phenanthroline (1.0 mol%) were added followed by an additional 1.5 equiv HBPin (218 μL) and the reaction vessel was sealed and heated at 80 °C for 16 h. The reaction mixture was allowed to return to room temperature and the reaction mixture was exposed to air and diluted with 5 mL MeOH. The volatiles were then removed under reduced pressure, and the residue was dissolved in MTBE. The solution was passed through a short SiO<sub>2</sub> plug, which was washed with ~ 75 mL MTBE. Volatiles were removed under reduced pressure, and the product was crystallized from the residue using MeOH/H<sub>2</sub>O to afford a white solid (250 mg, 90% isolated yield); mp: 123-125 °C; <sup>1</sup>H NMR (500 MHz, CDCl<sub>3</sub>) δ 7.87 (s, 1H), 6.61 (s, 1H), 5.32 (br s, 2H), 1.34 (s, 12H); <sup>13</sup>C NMR (125 MHz, CDCl<sub>3</sub>) δ 157.1, 143.37, 140.4, 117.3, 114.5, 100.1, 84.4, 24.9; <sup>11</sup>B NMR (160 MHz, CDCl<sub>3</sub>) δ 30 (br s); HRMS (ESI) *m/z* calcd for C<sub>13</sub>H<sub>16</sub>BClN<sub>2</sub>O<sub>2</sub> [M + H]<sup>+</sup> 279.1072, found 279.1068.

#### 5-chloro-4-methoxy-2-(4,4,5,5-tetramethyl-1,3,2-dioxaborolan-2-yl)-benzamine (11k)

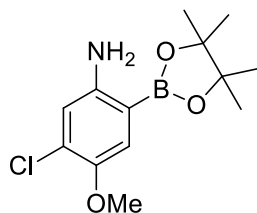

In a nitrogen filled glovebox, 154 mg 3-chloro-4-methoxyaniline (1.0 mmol, 1.0 equiv) was dissolved in 1 mL THF in a 15 mL pressure tube containing a magnetic stir bar. 1.5 equiv HBPin (218 μL) was added

and the reaction vessel was sealed and stirred at room temperature for 1 h. 0.25  $\mu\text{mol}$   $[\text{Ir}(\text{OMe})\text{COD}]_2$  (0.25 mol%) and 1.0  $\mu\text{mol}$  3,4,7,8-tetramethyl-1,10-phenanthroline (1.0 mol%) were added followed by an additional 1.5 equiv HBPIn (218  $\mu\text{L}$ ) and the reaction vessel was sealed and heated at 80  $^\circ\text{C}$  for 16 h. The reaction mixture was allowed to return to room temperature and the reaction mixture was exposed to air and diluted with 5 mL MeOH. The volatiles were then removed under reduced pressure, and the residue was dissolved in MTBE. The solution was passed through a short  $\text{SiO}_2$  plug, which was washed with  $\sim 75$  mL MTBE. Removal of the solvent under reduced pressure gave the product as a white solid (210 mg, 74% isolated yield); mp: 133-134  $^\circ\text{C}$ ;  $^1\text{H}$  NMR (500 MHz,  $\text{CDCl}_3$ )  $\delta$  7.15 (s, 1H), 6.67 (s, 1H), 4.49 (br s, 2H), 3.84 (s, 3H), 1.34 (s, 12H);  $^{13}\text{C}$  NMR (125 MHz,  $\text{CDCl}_3$ )  $\delta$  148.4, 146.8, 127.6, 119.9, 116.9, 83.8, 57.0, 24.9;  $^{11}\text{B}$  NMR (160 MHz,  $\text{CDCl}_3$ )  $\delta$  31 (br s); HRMS (ESI)  $m/z$  calcd for  $\text{C}_{13}\text{H}_{19}\text{BCINO}_3$   $[\text{M} + \text{H}]^+$  284.1225, found 284.1220.

#### 4-fluoro-2-(4,4,5,5-tetramethyl-1,3,2-dioxaborolan-2-yl)-benzamine (11l)

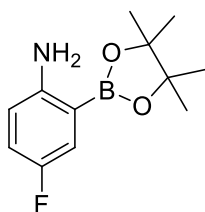

In a nitrogen filled glovebox, 95  $\mu\text{L}$  4-fluoroaniline (1.0 mmol, 1.0 equiv) was dissolved in 1 mL *n*-hexane in a 15 mL pressure tube containing a magnetic stir bar. 2.0 equiv HBPIn (290  $\mu\text{L}$ ) was added and the reaction vessel was sealed and stirred at room temperature for 1 h. 1.5  $\mu\text{mol}$   $[\text{Ir}(\text{OMe})\text{COD}]_2$  (1.5 mol%) and 3.0  $\mu\text{mol}$   $\text{N}^4, \text{N}^4, \text{N}^{4'}, \text{N}^{4'}$ -tetramethyl-[2,2'-bipyridine]-4,4'-diamine (3.0 mol%) were added and the reaction vessel was sealed and heated at 80  $^\circ\text{C}$  for 16 h. The reaction mixture was allowed to return to room temperature and the reaction mixture was exposed to air and diluted with 5 mL MeOH. The volatiles were then removed under reduced pressure, and the residue was dissolved in MTBE. The solution was passed through a short  $\text{SiO}_2$  plug, which was washed with  $\sim 75$  mL MTBE. The residue was purified by recrystallization from DCM/hexanes and the solvent was collected on a cold frit as a solid, which gave a yellow oil upon warming to room temperature (102 mg, 43% isolated yield (74% assay yield by  $^1\text{H}$  NMR));  $^1\text{H}$  NMR (500 MHz,  $\text{CD}_2\text{Cl}_2$ )  $\delta$  7.20 (dd,  $J = 9.3, 3.0$  Hz, 1H), 6.91 (td,  $J = 17.1, 8.8, 3.5$  Hz, 1H), 6.54 (q,  $J = 4.4$  Hz, 1H), 4.46 (br s, 2 H), 1.33 (s, 12H);  $^{13}\text{C}$  NMR (125 MHz,  $\text{CD}_2\text{Cl}_2$ )  $\delta$  155.9 (d  $J = 276.2$  Hz), 150.1, 121.2 (d,  $J = 20$  Hz), 119.4 (d,  $J = 23$  Hz), 115.7 (d,  $J = 6.7$  Hz), 84.0, 24.6;  $^{19}\text{F}$  NMR (470 MHz,  $\text{CD}_2\text{Cl}_2$ )  $\delta$  130.2 (td,  $J = 21.6, 13.2, 5.0$  Hz);  $^{11}\text{B}$  NMR (160 MHz,  $\text{CD}_2\text{Cl}_2$ )  $\delta$  30 (br s); HRMS (ESI)  $m/z$  calcd for  $\text{C}_{12}\text{H}_{17}\text{BFNO}_2$   $[\text{M} + \text{H}]^+$  238.1417, found 238.1540.

#### 4-amino-2,5-bis(4,4,5,5-tetramethyl-1,3,2-dioxaborolan-2-yl)-benzonitrile (11m)

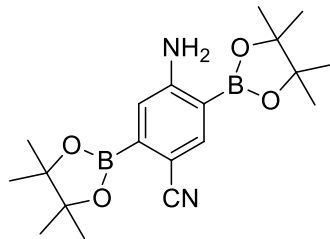

In a nitrogen filled glovebox, 118 mg of 4-aminobenzonitrile (1.0 mmol, 1.0 equiv) was dissolved in 1 mL THF in a 15 mL pressure tube containing a magnetic stir bar. 1.5 equiv HBpin (218  $\mu$ L) was added and the reaction vessel was sealed and stirred at room temperature for 1 h. 0.25  $\mu$ mol [Ir(OMe)COD]<sub>2</sub> (0.25 mol%) and 1.0  $\mu$ mol 3,4,7,8-tetramethyl-1,10-phenanthroline (1.0 mol%) were added followed by an additional 1.5 equiv HBpin (218  $\mu$ L) and the reaction vessel was sealed and heated at 80 °C for 16 h. The reaction mixture was allowed to return to room temperature and the reaction mixture was exposed to air and diluted with 5 mL MeOH. The volatiles were then removed under reduced pressure, and the residue was dissolved in MTBE. The solution was passed through a short SiO<sub>2</sub> plug, which was washed with ~ 75 mL MTBE. Volatiles were removed under reduced pressure, and the product was crystallized from the residue using MeOH/H<sub>2</sub>O to afford a white solid (329 mg, 89% isolated yield); mp: 175-180 °C; <sup>1</sup>H NMR (500 MHz, CDCl<sub>3</sub>)  $\delta$  7.93 (s, 1H), 6.97 (s, 1H), 5.15 (br, s, 2H), 1.36 (s, 12H) 1.33 (s, 12H); <sup>13</sup>C NMR (125 MHz, CDCl<sub>3</sub>)  $\delta$  155.3, 143.0, 121.3, 120.2, 103.5, 84.6, 84.1, 24.8; <sup>11</sup>B NMR (160 MHz, CDCl<sub>3</sub>)  $\delta$  29.7 (br s), 22.3 (s); HRMS (ESI) m/z calcd for C<sub>19</sub>H<sub>28</sub>B<sub>2</sub>N<sub>2</sub>O<sub>4</sub> [M + H]<sup>+</sup> 371.2313, found 371.2314.

#### 5-methoxy-2-(4,4,5-trimethyl-1,3,2-dioxaborolan-2-yl)aniline (11n)

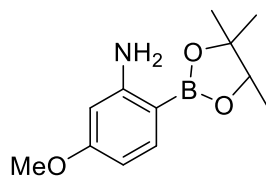

In a nitrogen filled glovebox, 123 mg of 3-methoxyaniline (1.0 mmol, 1.0 equiv) was dissolved in 1 mL THF in a 15 mL pressure tube containing a magnetic stir bar. 1.5 equiv HBPin (218  $\mu$ L) was added and the reaction vessel was sealed and stirred at room temperature for 1 h. 2.5  $\mu$ mol [Ir(OMe)COD]<sub>2</sub> (2.5 mol%) and 5.0  $\mu$ mol 3,4,7,8-tetramethyl-1,10-phenanthroline (5.0 mol%) were added followed by an additional 1.5 equiv HBPin (218  $\mu$ L) and the reaction vessel was sealed and heated at 80 °C for 16 h. The reaction mixture was allowed to return to room temperature and the reaction mixture was exposed to air and diluted with 5 mL MeOH. The volatiles were then removed under reduced pressure, and the residue was dissolved in MTBE. The solution was passed through a short SiO<sub>2</sub> plug, which was washed with ~ 75 mL MTBE. Purified by column chromatography; hexane: EtOAc (70: 30), yielding a red gel (91.0 mg,

26% yield);  $^1\text{H}$  NMR (500 MHz,  $\text{CDCl}_3$ )  $\delta$  7.54 (d,  $J = 8.3$  Hz, 1H), 6.27 (dd,  $J = 8.3, 2.4$  Hz, 1H), 6.11 (d,  $J = 2.4$  Hz, 1H), 4.76 (br s, 2H), 3.76 (s, 3H), 1.32 (s, 12H);  $^{13}\text{C}$  NMR (125 MHz,  $\text{CDCl}_3$ )  $\delta$  163.6, 155.4, 138.4, 103.7, 99.4, 83.2, 54.9, 24.8;  $^{11}\text{B}$  NMR (160 MHz,  $\text{CDCl}_3$ )  $\delta$  30 (br s); HRMS (ESI)  $m/z$  calcd for  $\text{C}_{13}\text{H}_{20}\text{BNO}_3$   $[\text{M} + \text{H}]^+$  250.1617, found 250.1626

### 3-methoxy-5-(4,4,5,5-tetramethyl-1,3,2-dioxaborolan-2-yl)aniline (11n')

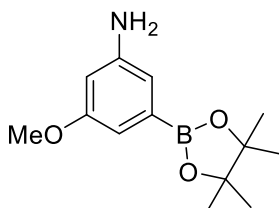

Chromatography of the mixture above gave this isomer as a red solid (163.8 mg, 47%); mp: 90-93 °C;  $^1\text{H}$  NMR (500 MHz,  $\text{CD}_3\text{CN}$ )  $\delta$  6.61 (d,  $J = 1.4$  Hz, 1H), 6.54 (d,  $J = 1.9$  Hz, 1H), 6.39 (t,  $J = 2.6, 1.9$  Hz, 1H), 4.15 (br s, 2H), 3.73 (s, 3H), 1.32 (s, 12H);  $^{13}\text{C}$  NMR (125 MHz,  $\text{CD}_3\text{CN}$ )  $\delta$  163.3, 146.7, 114.5, 109.1, 104.9, 83.7, 55.2, 24.8;  $^{11}\text{B}$  NMR (160 MHz,  $\text{CD}_3\text{CN}$ )  $\delta$  31 (br s); HRMS (ESI)  $m/z$  calcd for  $\text{C}_{13}\text{H}_{20}\text{BNO}_3$   $[\text{M} + \text{H}]^+$  250.1617, found 250.1620.

### 2-(4,4,5,5-tetramethyl-1,3,2-dioxaborolan-2-yl)-5-(trifluoromethyl)benzenamine (11o)

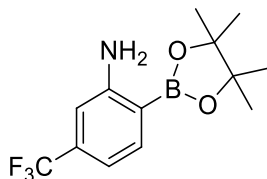

In a nitrogen filled glovebox, 124  $\mu\text{L}$  3-(trifluoromethyl)aniline (1.0 mmol, 1.0 equiv) was dissolved in 1 mL THF in a 15 mL pressure tube containing a magnetic stir bar. 1.5 equiv HBPIn (218  $\mu\text{L}$ ) was added and the reaction vessel was sealed and stirred at room temperature for 1 h. 2.5  $\mu\text{mol}$   $[\text{Ir}(\text{OMe})\text{COD}]_2$  (2.5 mol%) and 5.0  $\mu\text{mol}$  3,4,7,8-tetramethyl-1,10-phenanthroline (5.0 mol%) were added followed by an additional 1.5 equiv HBPIn (218  $\mu\text{L}$ ) and the reaction vessel was sealed and heated at 80 °C for 16 h. The reaction mixture was allowed to return to room temperature and the reaction mixture was exposed to air and diluted with 5 mL MeOH. The volatiles were then removed under reduced pressure, and the residue was dissolved in MTBE. The solution was passed through a short  $\text{SiO}_2$  plug, which was washed with  $\sim 75$  mL MTBE. The product was purified by column chromatography; heptane: MTBE (90: 10), affording a white solid (153 mg, 53% yield); mp: 64-65 °C;  $^1\text{H}$  NMR (500 MHz,  $\text{CDCl}_3$ )  $\delta$  7.70 (d,  $J = 7.9$  Hz, 1H), 6.88 (d,  $J = 7.9$  Hz, 1H), 6.80 (s, 1H), 4.92 (br s, 2H), 1.35 (s, 12H);  $^{13}\text{C}$  NMR (125 MHz,  $\text{CDCl}_3$ )  $\delta$  153.6, 137.4, 134.4 (q,  $J = 31.5$  Hz), 125.2 (q,  $J = 272.8$  Hz), 112.8 (q,  $J = 3.8$  Hz), 110.9 (q,  $J = 3.8$  Hz),

84.0, 24.9;  $^{19}\text{F}$  NMR (470 MHz,  $\text{CDCl}_3$ )  $\delta$  63.6;  $^{11}\text{B}$  NMR (160 MHz,  $\text{CDCl}_3$ )  $\delta$  30 (br s); HRMS (ESI)  $m/z$  calcd for  $\text{C}_{13}\text{H}_{17}\text{BF}_3\text{NO}_2$   $[\text{M} + \text{H}]^+$  288.1383, found 288.1378.<sup>3</sup>

### 3-(4,4,5,5-tetramethyl-1,3,2-dioxaborolan-2-yl)-5-(trifluoromethyl)-benzenamine (11o')

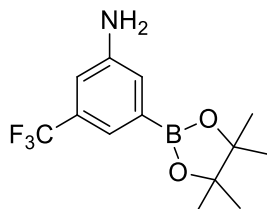

Chromatography of the mixture above gave this isomer as a white solid (62 mg, 22% yield); mp: 61-62 °C;  $^1\text{H}$  NMR (500 MHz,  $\text{CDCl}_3$ )  $\delta$  7.43 (s, 1H), 7.26 (s, 1H), 6.96 (s, 1H), 3.82 (br s, 2H), 1.34 (s, 12H);  $^{13}\text{C}$  NMR (125 MHz,  $\text{CDCl}_3$ )  $\delta$  146.1, 131.2 (q,  $J = 31.5$  Hz), 125.3 (q,  $J = 272.7$  Hz), 124.1, 121.1 (q,  $J = 3.8$  Hz), 113.8 (q,  $J = 3.8$  Hz), 84.2, 24.9;  $^{19}\text{F}$  NMR (470 MHz,  $\text{CDCl}_3$ )  $\delta$  62.8;  $^{11}\text{B}$  NMR (160 MHz,  $\text{CDCl}_3$ )  $\delta$  31 (br s); HRMS (ESI)  $m/z$  calcd for  $\text{C}_{13}\text{H}_{17}\text{BF}_3\text{NO}_2$   $[\text{M} + \text{H}]^+$  288.1383, found 288.1376.

### 5-chloro-2-(4,4,5,5-tetramethyl-1,3,2-dioxaborolan-2-yl)-benzenamine (11p)

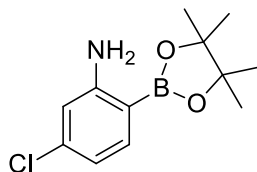

In a nitrogen filled glovebox, 106  $\mu\text{L}$  3-(chloro)aniline (1.0 mmol, 1.0 equiv) was dissolved in 1 mL THF in a 15 mL pressure tube containing a magnetic stir bar. 1.5 equiv HBPIn (218  $\mu\text{L}$ ) was added and the reaction vessel was sealed and stirred at room temperature for 1 h. 2.5  $\mu\text{mol}$   $[\text{Ir}(\text{OMe})\text{COD}]_2$  (2.5 mol%) and 5.0  $\mu\text{mol}$  3,4,7,8-tetramethyl-1,10-phenanthroline (5.0 mol%) were added followed by an additional 1.5 equiv HBPIn (218  $\mu\text{L}$ ) and the reaction vessel was sealed and heated at 80 °C for 16 h. The reaction mixture was allowed to return to room temperature and the reaction mixture was exposed to air and diluted with 5 mL MeOH. The volatiles were then removed under reduced pressure, and the residue was dissolved in MTBE. The solution was passed through a short  $\text{SiO}_2$  plug, which was washed with  $\sim 75$  mL MTBE. Purified by column chromatography; heptane: MTBE (90:10), affording a white solid (105 mg, 42% yield); mp: 64-65 °C;  $^1\text{H}$  NMR (500 MHz,  $\text{CDCl}_3$ )  $\delta$  7.50 (d,  $J = 7.8$  Hz, 1H), 6.63 (dd,  $J = 7.8, 1.9$  Hz, 1H), 6.58 (d,  $J = 2.0$  Hz, 1H), 4.80 (br s, 2H), 1.35 (s, 12H);  $^{13}\text{C}$  NMR (125 MHz,  $\text{CDCl}_3$ )  $\delta$  154.6, 138.6, 138.0, 117.1, 114.2, 83.6, 24.9;  $^{11}\text{B}$  NMR (160 MHz,  $\text{CDCl}_3$ )  $\delta$  30 (br s); HRMS (ESI)  $m/z$  calcd for  $\text{C}_{12}\text{H}_{17}\text{BClNO}_2$   $[\text{M} + \text{H}]^+$  254.1121, found 254.1129.

### 3-chloro-5-(4,4,5,5-tetramethyl-1,3,2-dioxaborolan-2-yl)aniline (11p')

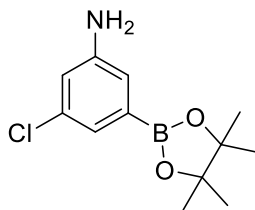

Chromatography of the mixture above gave this isomer as a yellow solid (43 mg, 17% yield); mp: 54-55 °C;  $^1\text{H}$  NMR (500 MHz,  $\text{CDCl}_3$ )  $\delta$  7.17 (d,  $J = 1.0$  Hz, 1H), 6.98 (d,  $J = 1.9$  Hz, 1H) 6.76 (dd,  $J = 1.9, 1.0$  Hz, 1H), 3.70 (br s, 2H), 1.34 (s, 12H);  $^{13}\text{C}$  NMR (125 MHz,  $\text{CDCl}_3$ )  $\delta$  147.1, 146.3, 124.4, 119.2, 115.4, 84.0, 24.8;  $^{11}\text{B}$  NMR (160 MHz,  $\text{CDCl}_3$ )  $\delta$  30 (br s); HRMS (ESI)  $m/z$  calcd for  $\text{C}_{12}\text{H}_{17}\text{BClNO}_2$  [ $\text{M} + \text{H}$ ] $^+$  254.1121, found 254.1134.

### N-methyl-3-chloro-5-(4,4,5,5-tetramethyl-1,3,2-dioxaborolan-2-yl)-benzenamine (12)

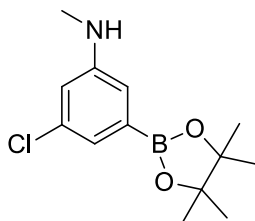

In a nitrogen filled glovebox, 122  $\mu\text{L}$  3-chloro-*N*-methylaniline (1.0 mmol, 1.0 equiv) was dissolved in 1 mL THF in a 15 mL pressure tube containing a magnetic stir bar. 2.0 equiv HBPIn (290  $\mu\text{L}$ ) was added and the reaction vessel was sealed and stirred at room temperature for 1 h. 0.25  $\mu\text{mol}$   $[\text{Ir}(\text{OMe})\text{COD}]_2$  (0.25 mol%) and 1.0  $\mu\text{mol}$  3,4,7,8-tetramethyl-1,10-phenanthroline (1.0 mol%) was added and the reaction vessel was sealed and heated at 80 °C for 16 h. The reaction mixture was allowed to return to room temperature and the reaction mixture was exposed to air and diluted with 5 mL MeOH. The volatiles were then removed under reduced pressure, and the residue was dissolved in MTBE. The solution was passed through a short  $\text{SiO}_2$  plug, which was washed with  $\sim 75$  mL MTBE. Volatiles were removed under reduced pressure, and the product was crystallized from the residue using MeOH/ $\text{H}_2\text{O}$  to afford a white solid (230 mg, 86% isolated yield); mp: 75-76 °C;  $^1\text{H}$  NMR (500 MHz,  $\text{CDCl}_3$ )  $\delta$  7.11 (d,  $J = 2.0$  Hz, 1H), 6.90 (d,  $J = 2.5$  Hz, 1H), 6.66 (t,  $J = 2.4, 2.0$  Hz, 1H), 3.77 (br s, 1H), 2.82 (s, 3H), 1.33 (s, 12H);  $^{13}\text{C}$  NMR (125 MHz,  $\text{CDCl}_3$ )  $\delta$  133.9, 122.9, 117.0, 114.4, 84.0, 30.6, 24.9;  $^{11}\text{B}$  NMR (160 MHz,  $\text{CDCl}_3$ )  $\delta$  30 (br s); HRMS (ESI)  $m/z$  calcd for  $\text{C}_{13}\text{H}_{19}\text{BClNO}_2$  [ $\text{M} + \text{H}$ ] $^+$  268.1276, found 268.1270.



### 2-methoxy-4-(4,4,5,5-tetramethyl-1,3,2-dioxaborolan-2-yl)-benzenamine (13)

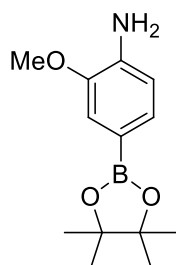

In a nitrogen filled glovebox, 113  $\mu\text{L}$  *o*-anisidine (1.0 mmol, 1.0 equiv) was dissolved in 1 mL THF in a 15 mL pressure tube containing a magnetic stir bar. 1.5 equiv HBPIn (218  $\mu\text{L}$ ) was added and the reaction vessel was sealed and stirred at room temperature for 1 h. 0.25  $\mu\text{mol}$   $[\text{Ir}(\text{OMe})\text{COD}]_2$  (0.25 mol%) and 1.0  $\mu\text{mol}$  3,4,7,8-tetramethyl-1,10-phenanthroline (1.0 mol%) were added followed by an additional 1.5 equiv HBPIn (218  $\mu\text{L}$ ) and the reaction vessel was sealed and heated at 80  $^\circ\text{C}$  for 16h. The reaction mixture was allowed to return to room temperature and the reaction mixture was exposed to air and diluted with 5 mL MeOH. The volatiles were then removed under reduced pressure, and the residue was dissolved in MTBE. The solution was passed through a short  $\text{SiO}_2$  plug, which was washed with  $\sim 75$  mL MTBE. Volatiles were removed under reduced pressure, and the product was crystallized from the residue using MeOH/ $\text{H}_2\text{O}$  to afford a white solid (152 mg, 61% isolated yield); mp: 68-70  $^\circ\text{C}$ ;  $^1\text{H}$  NMR (500 MHz,  $\text{CDCl}_3$ )  $\delta$  7.30 (dd,  $J = 7.8, 1.5$  Hz, 1H), 7.20 (d,  $J = 1.5$  Hz, 1H), 6.71 (d,  $J = 7.5$  Hz, 1H), 4.08 (br s, 2H), 3.89 (s, 3H), 1.33 (s, 12H);  $^{13}\text{C}$  NMR (125 MHz,  $\text{CDCl}_3$ )  $\delta$  146.5, 139.3, 128.8, 115.9, 114.1, 83.3, 55.5, 24.8;  $^{11}\text{B}$  NMR (160 MHz,  $\text{CDCl}_3$ )  $\delta$  31 (br s); HRMS (ESI)  $m/z$  calcd for  $\text{C}_{13}\text{H}_{20}\text{BNO}_3$   $[\text{M} + \text{H}]^+$  250.1614, found 250.1612.

### 5-amino-2-chloro-4-(4,4,5,5-tetramethyl-1,3,2-dioxaborolan-2-yl)-pyridine (14a)

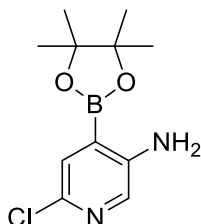

In a nitrogen filled glovebox, 128 mg 6-chloropyridin-3-amine (1.0 mmol, 1.0 equiv) was dissolved in 1 mL THF in a 15 mL pressure tube containing a magnetic stir bar. 1.2 equiv HBPIn (173  $\mu\text{L}$ ) was added and the reaction vessel was sealed and stirred at room temperature for 1 h. 1.5  $\mu\text{mol}$   $[\text{Ir}(\text{OMe})\text{COD}]_2$  (1.5 mol%), 3.0  $\mu\text{mol}$  3,4,7,8-tetramethyl-1,10-phenanthroline (3.0 mol%) and 0.5 equiv  $\text{B}_2\text{Pin}_2$  (127 mg) were added and the reaction vessel was sealed and heated at 80  $^\circ\text{C}$  for 8 h. The reaction mixture was allowed to return to room temperature and the reaction mixture was exposed to air and diluted with 5 mL

MeOH. The volatiles were then removed under reduced pressure, the residue was dissolved in DCM, and the solution was passed through a short SiO<sub>2</sub> plug, which was washed with ~ 75 mL DCM. Volatiles were removed under reduced pressure, and the product was crystallized from the residue using DCM/hexanes to afford a white solid (224 mg, 88% isolated yield); mp: 116-117 °C; <sup>1</sup>H NMR (500 MHz, CDCl<sub>3</sub>) δ 7.81 (s, 1H), 7.41 (s, 1H), 4.68 (br s, 2H), 1.34 (s, 12H); <sup>13</sup>C NMR (125 MHz, CDCl<sub>3</sub>) δ 147.3, 138.7, 136.8, 129.4, 84.6, 24.9; <sup>11</sup>B NMR (160 MHz, CDCl<sub>3</sub>) δ 30 (br s); HRMS (ESI) m/z calcd for C<sub>11</sub>H<sub>16</sub>BCIN<sub>2</sub>O<sub>2</sub> [M + H]<sup>+</sup> 255.1016, found 255.0990.

**5-amino-4-(4,4,5,5-tetramethyl-1,3,2-dioxaborolan-2-yl)-2-methyl pyridine (14b)**

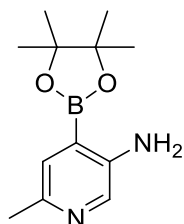

In a nitrogen filled glovebox, 108 mg 6-methylpyridin-3-amine (1.0 mmol, 1.0 equiv) was dissolved in 1 mL THF in a 15 mL pressure tube containing a magnetic stir bar. 1.2 equiv HBPIn (173 μL) was added and the reaction vessel was sealed and stirred at room temperature for 1 h. 1.5 μmol [Ir(OMe)COD]<sub>2</sub> (1.5 mol%), 3.0 μmol 3,4,7,8-tetramethyl-1,10-phenanthroline (3.0 mol%) and 0.5 equiv B<sub>2</sub>Pin<sub>2</sub> (127 mg) were added and the reaction vessel was sealed and heated at 80 °C for 8 h. The reaction mixture was allowed to return to room temperature and the reaction mixture was exposed to air and diluted with 5 mL MeOH. The volatiles were then removed under reduced pressure, and the residue was dissolved in MTBE. The solution was passed through a short SiO<sub>2</sub> plug, which was washed with ~ 75 mL MTBE. Volatiles were removed under reduced pressure, and the product was crystallized from the residue using EtOAc/hexanes to afford a white solid (152 mg, 63% isolated yield); mp: 68-70 °C; <sup>1</sup>H NMR (500 MHz, CD<sub>2</sub>Cl<sub>2</sub>) δ 7.95 (s, H), 7.23 (s, 1H), 4.55 (br s, 2H), 2.37 (s, 3H), 1.36 (s, 12H); <sup>13</sup>C NMR (125 MHz, CD<sub>2</sub>Cl<sub>2</sub>) δ 146.2, 145.6, 136.7, 128.2, 84.2, 24.7, 22.5; <sup>11</sup>B NMR (160 MHz, CD<sub>2</sub>Cl<sub>2</sub>) δ 30 (br s); HRMS (ESI) m/z calcd for C<sub>12</sub>H<sub>19</sub>BN<sub>2</sub>O<sub>2</sub> [M + H]<sup>+</sup> 235.1620, found 235.1387.

**2-chloro-5-(4,4,5,5-tetramethyl-1,3,2-dioxaborolan-2-yl)pyridin-4-amine (14c)**

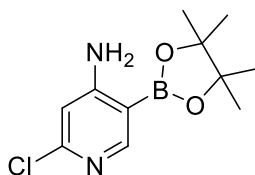

In a nitrogen filled glovebox, 128 mg 2-chloropyridin-4-amine (1.0 mmol, 1.0 equiv) was dissolved in 1 mL THF in a 15 mL pressure tube containing a magnetic stir bar. 1.2 equiv HBPIn (173  $\mu$ L) was added and the reaction vessel was sealed and stirred at room temperature for 1 h. 1.5  $\mu$ mol [Ir(OMe)COD]<sub>2</sub> (1.5 mol%), 3.0  $\mu$ mol 3,4,7,8-tetramethyl-1,10-phenanthroline (3.0 mol%) and 0.5 equiv B<sub>2</sub>Pin<sub>2</sub> (127 mg) were added and the reaction vessel was sealed and heated at 80 °C for 8 h. The reaction mixture was allowed to return to room temperature and the reaction mixture was exposed to air and diluted with 5 mL MeOH. The volatiles were then removed under reduced pressure, the residue was dissolved in DCM, and the solution was passed through a short SiO<sub>2</sub> plug, which was washed with ~ 75 mL DCM. Volatiles were removed under reduced pressure, and the product was crystallized from the residue using MeOH/H<sub>2</sub>O to afford a white solid (249 mg, 98% isolated yield); mp: 170-171 °C; <sup>1</sup>H NMR (500 MHz, CDCl<sub>3</sub>)  $\delta$  8.34 (s, 1H), 6.46 (s, 1H), 5.29 (br s, 2H), 1.34 (s, 12H); <sup>13</sup>C NMR (125 MHz, CDCl<sub>3</sub>)  $\delta$  160.3, 157.5, 154.8, 107.7, 84.1, 24.9; <sup>11</sup>B NMR (160 MHz, CDCl<sub>3</sub>)  $\delta$  30 (br s); HRMS (ESI) m/z calcd for C<sub>11</sub>H<sub>16</sub>BClN<sub>2</sub>O<sub>2</sub> [M + H]<sup>+</sup> 255.1074, found 255.1206.

#### 2-methoxy-5-(4,4,5,5-tetramethyl-1,3,2-dioxaborolan-2-yl)pyridin-4-amine (14d)

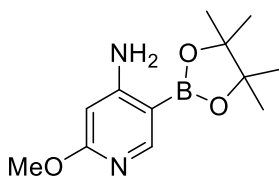

In a nitrogen filled glovebox, 124 mg 2-methoxypyridin-4-amine (1.0 mmol, 1.0 equiv) was dissolved in 1 mL THF in a 15 mL pressure tube containing a magnetic stir bar. 1.2 equiv HBPIn (173  $\mu$ L) was added and the reaction vessel was sealed and stirred at room temperature for 1 h. 1.5  $\mu$ mol [Ir(OMe)COD]<sub>2</sub> (1.5 mol%), 3.0  $\mu$ mol 3,4,7,8-tetramethyl-1,10-phenanthroline (3.0 mol%) and 0.5 equiv B<sub>2</sub>Pin<sub>2</sub> (127 mg) were added and the reaction vessel was sealed and heated at 80 °C for 8 h. The reaction mixture was allowed to return to room temperature and the reaction mixture was exposed to air and diluted with 5 mL MeOH. The volatiles were then removed under reduced pressure, the residue was dissolved in DCM, and the solution was passed through a short SiO<sub>2</sub> plug, which was washed with ~ 75 mL DCM. Volatiles were removed under reduced pressure, and the product was crystallized from the residue using MeOH/H<sub>2</sub>O to afford a white solid (150 mg, 60% isolated yield); mp: 91-94 °C; <sup>1</sup>H NMR (500 MHz, CDCl<sub>3</sub>)  $\delta$  8.27 (s, 1H), 5.83 (s, 1H), 5.10 (br s, 2H), 3.89 (s, 3H), 1.34 (s, 12H); <sup>13</sup>C NMR (125 MHz, CDCl<sub>3</sub>)  $\delta$  160.7, 156.3, 148.5, 92.0, 83.5, 53.3, 24.9; <sup>11</sup>B NMR (160 MHz, CDCl<sub>3</sub>)  $\delta$  30 (br s); HRMS (ESI) m/z calcd for C<sub>12</sub>H<sub>19</sub>BN<sub>2</sub>O<sub>3</sub> [M + H]<sup>+</sup> 251.1569, found 251.1700.

#### 4-(4,4,5,5-tetramethyl-1,3,2-dioxaborolan-2-yl)-6-(trifluoromethyl)pyridin-2-amine (14e)

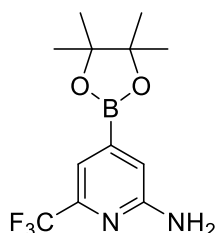

In a nitrogen filled glovebox, 162 mg 6-(trifluoromethyl)pyridin-2-amine (1.0 mmol, 1.0 equiv) was dissolved in 1 mL THF in a 15 mL pressure tube containing a magnetic stir bar. 1.2 equiv HBPIn (173  $\mu$ L) was added and the reaction vessel was sealed and stirred at room temperature for 1 h. 1.5  $\mu$ mol [Ir(OMe)COD]<sub>2</sub> (1.5 mol%), 3.0  $\mu$ mol 3,4,7,8-tetramethyl-1,10-phenanthroline (3.0 mol%) and 0.5 equiv B<sub>2</sub>Pin<sub>2</sub> (127 mg) were added and the reaction vessel was sealed and heated at 80 °C for 8 h. The reaction mixture was allowed to return to room temperature and the reaction mixture was exposed to air and diluted with 5 mL MeOH. The volatiles were then removed under reduced pressure, the residue was dissolved in DCM, and the solution was passed through a short SiO<sub>2</sub> plug, which was washed with ~ 75 mL DCM. Volatiles were removed under reduced pressure, and the product was crystallized from the residue using MeOH/H<sub>2</sub>O to afford a white solid (282 mg, 98% isolated yield); mp: 97-98 °C; <sup>1</sup>H NMR (500 MHz, CDCl<sub>3</sub>)  $\delta$  7.32 (s, 1H), 7.03 (s, 1H), 4.74 (br s, 2H), 1.34 (s, 12H); <sup>13</sup>C NMR (125 MHz, CDCl<sub>3</sub>)  $\delta$  158.0, 145.9 (q, *J* = 33 Hz), 122.8 (q, *J* = 273 Hz), 117.8, 114.5 (q, *J* = 3 Hz), 84.7, 24.8; <sup>19</sup>F NMR (470 MHz, CDCl<sub>3</sub>)  $\delta$  68.5; <sup>11</sup>B NMR (160 MHz, CDCl<sub>3</sub>)  $\delta$  30 (br s); HRMS (ESI) *m/z* calcd for C<sub>12</sub>H<sub>16</sub>BF<sub>3</sub>N<sub>2</sub>O<sub>2</sub> [M + H]<sup>+</sup> 289.1337, found 289.1680.

#### 6-chloro-4-(4,4,5,5-tetramethyl-1,3,2-dioxaborolan-2-yl)pyridin-2-amine (14f)

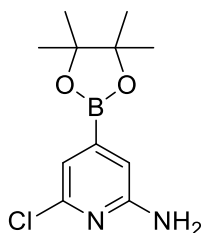

In a nitrogen filled glovebox, 128 mg 6-chloropyridin-2-amine (1.0 mmol, 1.0 equiv) was dissolved in 1 mL THF in a 15 mL pressure tube containing a magnetic stir bar. 1.2 equiv HBPIn (173  $\mu$ L) was added and the reaction vessel was sealed and stirred at room temperature for 1 h. 1.5  $\mu$ mol [Ir(OMe)COD]<sub>2</sub> (1.5 mol%), 3.0  $\mu$ mol 3,4,7,8-tetramethyl-1,10-phenanthroline (3.0 mol%) and 0.5 equiv B<sub>2</sub>Pin<sub>2</sub> (127 mg) were added and the reaction vessel was sealed and heated at 80 °C for 8 h. The reaction mixture was allowed to return to room temperature and the reaction mixture was exposed to air and diluted with 5 mL

MeOH. The volatiles were then removed under reduced pressure, the residue was dissolved in DCM, and the solution was passed through a short SiO<sub>2</sub> plug, which was washed with ~ 75 mL DCM. Volatiles were removed under reduced pressure, and the product was crystallized from the residue using MeOH/H<sub>2</sub>O to afford a white solid (170 mg, 67% isolated yield); mp: 160-163 °C; <sup>1</sup>H NMR (500 MHz, CDCl<sub>3</sub>) δ 6.99 (s, 1H), 6.75 (s, 1H), 4.54 (br s, 2H), 1.34 (s, 12H); <sup>13</sup>C NMR (125 MHz, CDCl<sub>3</sub>) δ 158.1, 149.4, 117.8, 112.0, 84.6, 24.8; <sup>11</sup>B NMR (160 MHz, CDCl<sub>3</sub>) δ 30 (br s); HRMS (ESI) m/z calcd for C<sub>11</sub>H<sub>16</sub>BClN<sub>2</sub>O<sub>2</sub> [M + H]<sup>+</sup> 255.1074, found 255.1205.

**Borylation of Aniline.** In a nitrogen filled glovebox, 91 μL aniline (1 mmol) was dissolved in 1 mL THF in a 15 mL pressure tube containing a magnetic stir bar. 1.5 equiv HBpin (218 μL) was added and the reaction vessel was sealed and stirred at room temperature for 1 h. 1.5 μmol [Ir(OMe)COD]<sub>2</sub> (1.5 mol%), 3.0 μmol 3,4,7,8-tetramethyl-1,10-phenanthroline (3.0 mol%) and 24 mg dodecahydrotriphenylene (0.10 mmol) were added and the reaction vessel was sealed and heated at 80 °C for 16 h. The reaction mixture was allowed to return to room temperature and the reaction mixture was exposed to air and diluted with 5 mL MeOH. The volatiles were then removed under reduced pressure and the product assay yields were determined by <sup>1</sup>H NMR.

**4-(4,4,5,5-tetramethyl-1,3,2-dioxaborolan-2-yl)aniline** <sup>1</sup>H NMR (500 MHz, CDCl<sub>3</sub>) δ 7.62 (d, *J* = 8.4 Hz, 2H), 6.66 (d, *J* = 8.4 Hz, 2H), 3.83 (br, s, 2H), 1.32 (s, 12H); <sup>13</sup>C NMR (125 MHz, CDCl<sub>3</sub>) δ 149.2, 136.5, 114.0, 83.2, 24.8; <sup>11</sup>B NMR (160 MHz, CDCl<sub>3</sub>) δ 30 (br s).

**3-(4,4,5,5-tetramethyl-1,3,2-dioxaborolan-2-yl)aniline** <sup>1</sup>H NMR (500 MHz, DMSO-d<sub>6</sub>) δ 7.01 (t, *J* = 7.8, 7.3 Hz, 1H), 6.98 (s, *J* = 1.5 Hz, 1H), 6.81 (d, *J* = 7.3 Hz, 1H), 6.65 (dd, *J* = 8.3, 1.5 Hz, 1H), 5.07 (br, s, 2H), 1.25 (s, 12H); <sup>13</sup>C NMR (125 MHz, CDCl<sub>3</sub>) δ 145.7, 128.7, 124.9, 121.1, 117.9, 83.6, 24.8; <sup>11</sup>B NMR (160 MHz, CDCl<sub>3</sub>) δ 31 (br s).

**2-(4,4,5,5-tetramethyl-1,3,2-dioxaborolan-2-yl)aniline** <sup>1</sup>H NMR (500 MHz, CDCl<sub>3</sub>) δ 7.63 (dd, *J* = 7.3, 1.5 Hz, 1H), 7.24 (dt, *J* = 8.8, 8.3, 2.0 Hz, 1H), 6.68 (td, *J* = 8.3, 7.3, 1.0 Hz, 1H), 6.61 (d, *J* = 8.3 Hz, 1H), 4.73 (br, s, 2H), 1.35 (s, 12H); <sup>13</sup>C NMR (125 MHz, CDCl<sub>3</sub>) δ 153.6, 135.7, 132.7, 116.8, 114.7, 83.4, 24.9; <sup>11</sup>B NMR (160 MHz, CDCl<sub>3</sub>) δ 31 (br s)

## Independent Synthesis of 2,4-bis(4,4,5,5-tetramethyl-1,3,2-dioxaborolan-2-yl)aniline from 4-(4,4,5,5-tetramethyl-1,3,2-dioxaborolan-2-yl)aniline

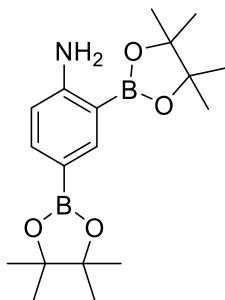

In a nitrogen filled glovebox, 219 mg 4-(4,4,5,5-tetramethyl-1,3,2-dioxaborolan-2-yl)aniline (1 mmol) was dissolved in 1 mL THF in a 15 mL pressure tube containing a magnetic stir bar. 2.2 equiv HBPin (319  $\mu$ L) was added and the reaction vessel was sealed and stirred at room temperature for 1 h. 1.5  $\mu$ mol  $[\text{Ir}(\text{OMe})\text{COD}]_2$  (1.5 mol%), 3.0  $\mu$ mol 3,4,7,8-tetramethyl-1,10-phenanthroline (3.0 mol%) and were added and the reaction vessel was sealed and heated at 80  $^{\circ}\text{C}$  for 16 h. The reaction mixture was allowed to return to room temperature and the reaction mixture was exposed to air and diluted with 5 mL MeOH. The volatiles were then removed under reduced pressure, and the residue was dissolved in MTBE. The solution was passed through a short  $\text{SiO}_2$  plug, which was washed with  $\sim 75$  mL MTBE. Volatiles were removed under reduced pressure, and the product was crystallized from the residue using MeOH/ $\text{H}_2\text{O}$  to afford a red solid (242 mg, 70% isolated yield); mp: 152-157  $^{\circ}\text{C}$ ;  $^1\text{H}$  NMR (500 MHz,  $\text{CDCl}_3$ )  $\delta$  8.11 (s,  $J = 1.4$  Hz, 1H), 7.67 (dd,  $J = 15, 8.3$  Hz, 1H), 6.62 (d,  $J = 7.8$  Hz, 1H), 5.30 (br, s, 2H), 1.33 (s, 24H);  $^{13}\text{C}$  NMR (125 MHz,  $\text{CDCl}_3$ )  $\delta$  156.1, 144.4, 139.4, 113.8, 83.4, 83.1, 24.9, 24.8;  $^{11}\text{B}$  NMR (160 MHz,  $\text{CDCl}_3$ )  $\delta$  31 (br s); HRMS (ESI)  $m/z$  calcd for  $\text{C}_{18}\text{H}_{29}\text{B}_2\text{NO}_4$   $[\text{M} + \text{H}]^+$  346.2368, found 346.2547.

## In Situ generation and borylation of 4,4,5,5-tetramethyl-N-(3-(trifluoromethyl)phenyl)-1,3,2-dioxaborolan-2-amine

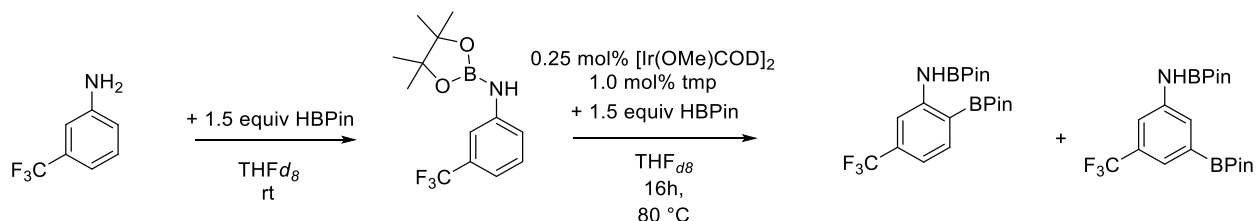

In a nitrogen filled glovebox, 62  $\mu$ L 3-(trifluoromethyl)aniline (0.5 mmol) and 21 mg 1,4-bis(trifluoromethyl)-benzene (0.1 mmol) was dissolved in 1 mL  $\text{THF}_{d8}$  and transferred to a screw cap NMR tube. 109  $\mu$ L HBPin (0.75 mmol) was added via micro pipette and the tube was loosely sealed. After 30 min, the cap was firmly tightened and  $^1\text{H}$  and  $^{19}\text{F}$  NMR were recorded. The NMR tube was returned to the glove box and 1.7 mg  $[\text{Ir}(\text{OMe})\text{COD}]_2$  (0.25 mol%), 2.4 mg 3,4,7,8-tetramethyl-1,10-

phenanthroline (1.0 mol%) and an additional 109  $\mu\text{L}$  HBPin (0.75 mmol 1.5 equiv HBPin (218  $\mu\text{L}$ ) was added and the reaction vessel was sealed and heated at 80  $^{\circ}\text{C}$  for 16 h.

**$^1\text{H}$  and  $^{19}\text{F}$  NMR of 4,4,5,5-tetramethyl-N-(3-(trifluoromethyl)phenyl)-1,3,2-dioxaborolan-2-amine.**

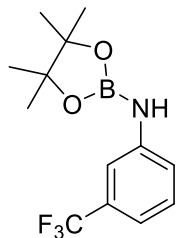

$^1\text{H}$  NMR (500 MHz,  $\text{THF-}d_8$ )  $\delta$  7.39 (s, 1H), 7.33 (d,  $J = 8.3$  Hz, 1H), 7.24 (t,  $J = 8.3, 7.8$  Hz, 1H), 7.00 (d,  $J = 7.8$  Hz, 1H), 6.32 (br s, 1H), 1.27 (s, 12H);  $^{19}\text{F}$  NMR (470 MHz,  $\text{THF-}d_8$ )  $\delta$  63.6 (s).

**$^1\text{H}$  and  $^{19}\text{F}$  NMR of 4,4,5,5-tetramethyl-N-(2-(4,4,5,5-tetramethyl-1,3,2-dioxaborolan-2-yl)-5-(trifluoromethyl)phenyl)-1,3,2-dioxaborolan-2-amine**

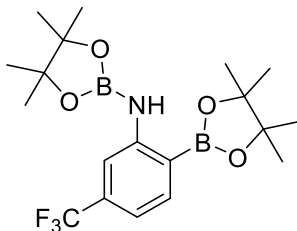

$^1\text{H}$  NMR (500 MHz,  $\text{THF-}d_8$ )  $\delta$  7.96 (s, 1H), 7.73 (d,  $J = 7.8$  Hz, 1H), 7.00 (d,  $J = 8.3$  Hz, 1H), 6.88 (s, 1H), 1.35 (s, 12H), 1.29 (s, 12H);  $^{19}\text{F}$  NMR (470 MHz,  $\text{THF-}d_8$ )  $\delta$  64.1 (s).

**$^1\text{H}$  and  $^{19}\text{F}$  NMR of 4,4,5,5-tetramethyl-N-(3-(4,4,5,5-tetramethyl-1,3,2-dioxaborolan-2-yl)-5-(trifluoromethyl)phenyl)-1,3,2-dioxaborolan-2-amine**

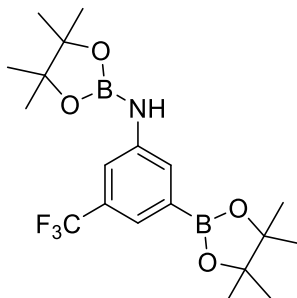

$^1\text{H}$  NMR (500 MHz,  $\text{THF-}d_8$ )  $\delta$  7.67 (s, 1H), 7.57 (s, 1H), 7.42 (s, 1H), 6.26 (s, 1H), 1.31 (s, 12H), 1.27 (s, 12H);  $^{19}\text{F}$  NMR (470 MHz,  $\text{THF-}d_8$ )  $\delta$  63.4 (s).

### In Situ generation of 1-(4,4,5,5-tetramethyl-1,3,2-dioxaborolan-2-yl)-1H-indole (3)

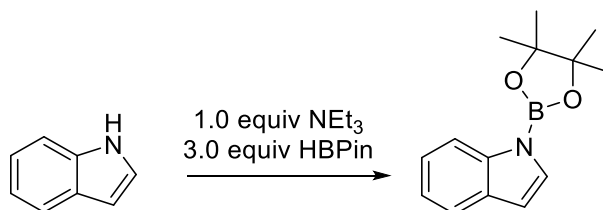

In a nitrogen filled glovebox 117 mg indole (1 mmol) was dissolved in 1 mL C<sub>6</sub>D<sub>6</sub> in a screw cap NMR tube. 2.0 equiv HBpin (290  $\mu$ L) and 1.0 equiv NEt<sub>3</sub> (140  $\mu$ L) was added and the tube was sealed and heated at 80 °C for 30 min. Quantitative conversion was observed by NMR. <sup>1</sup>H NMR (500 MHz, C<sub>6</sub>D<sub>6</sub>)  $\delta$  8.24 (d,  $J$  = 8.4 Hz, 1H), 7.56 (d,  $J$  = 7.8 Hz, 1H), 7.48 (d,  $J$  = 3.5 Hz, 1H), 7.25 (dd,  $J$  = 8.4, 6.8 Hz, 1H), 7.15 (dd,  $J$  = 7.8, 6.8 Hz, 1H), 0.96 (s, 12H); <sup>11</sup>B NMR (160 MHz, C<sub>6</sub>D<sub>6</sub>)  $\delta$  24 (br s).

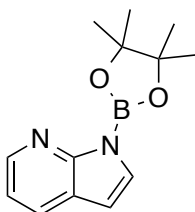

**N-Borylation of 7-azaindole.** In a nitrogen filled glovebox, 10 mg 7-azaindole (0.085 mmol) was dissolved in THF-*d*<sub>8</sub> in a NMR pressure tube. [Ir(OMe)COD]<sub>2</sub> (2.5 mol%), 3,4,7,8-tetramethyl-1,10-phenanthroline (5.0 mol%) and 2.0 equiv B<sub>2</sub>Pin<sub>2</sub> were added and the reaction vessel was sealed and heated at 80 °C for 1.5 hours, and N-borylated 7-azaindole was obtained. <sup>1</sup>H NMR (500 MHz, THF-*d*<sub>8</sub>)  $\delta$  8.34 (dd,  $J$  = 2, 4.9 Hz, 1H), 7.91 (dd,  $J$  = 1.9, 7.8 Hz, 1H), 7.53 (d,  $J$  = 3.9 Hz, 1H), 7.13 (dd,  $J$  = 4.4, 7.8 Hz, 1H), 6.59 (d,  $J$  = 3.5 Hz, 1H), 1.46 (s, 12H); Following the addition of 0.1 ml methanol, the nitrogen-boron bond was cleaved, regenerating 7-azaindole.

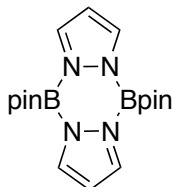

**N-Borylation of pyrazole.** In a nitrogen filled glovebox, 68 mg pyrazole (1 mmol) was dissolved in 1 mL THF in a 15 mL pressure tube containing a magnetic stir bar and 1.0 equiv HBPin was added and the reaction vessel was sealed and heated at 80 °C for 7 hours. The N-borylated compound was the major species in solution. <sup>1</sup>H NMR (500 MHz, CDCl<sub>3</sub>)  $\delta$  7.91 (d,  $J$  = 2.0 Hz, 2 H), 6.28 (t,  $J$  = 2.5 Hz, 1H), 1.29



(s, 6H), 1.21 (s, 6H);  $^{11}\text{B}$  NMR (160 MHz,  $\text{CDCl}_3$ )  $\delta$  5.0 (s). The  $^1\text{H}$  NMR data are similar to those reported for a related pyrazole complex with catecholate groups in place of the pinacولات.<sup>4</sup> Following the addition of 0.4 ml methanol, the nitrogen-boron bond was cleaved, regenerating the starting pyrazole.

### In Situ generation of 6-chloro-N-(4,4,5,5-tetramethyl-1,3,2-dioxaborolan-2-yl)pyridin-2-amine

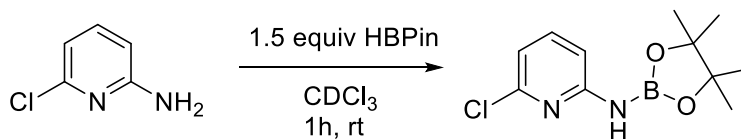

In a nitrogen filled glovebox 128 mg 6-chloropyridin-2-amine (1 mmol) was dissolved in 1 mL  $\text{CDCl}_3$  in a screw cap NMR tube. 1.5 equiv HBpin (218  $\mu\text{L}$ ) was added and the tube was sealed and kept at room temperature for 1h. Quantitative conversion was observed by NMR.  $^1\text{H}$  NMR (500 MHz,  $\text{CDCl}_3$ )  $\delta$  7.40 (t,  $J = 7.8, 7.3$  Hz, 1H), 7.24 (d,  $J = 8.3$  Hz, 1H), 6.72 (d,  $J = 7.3$  Hz, 1H), 5.55 (s, 1H), 1.26 (s, 12H);  $^{11}\text{B}$  NMR (160 MHz,  $\text{CDCl}_3$ )  $\delta$  24 (br s).

### Borane Effect on Regioselectivity of borylation of 3-(trifluoromethyl)aniline.

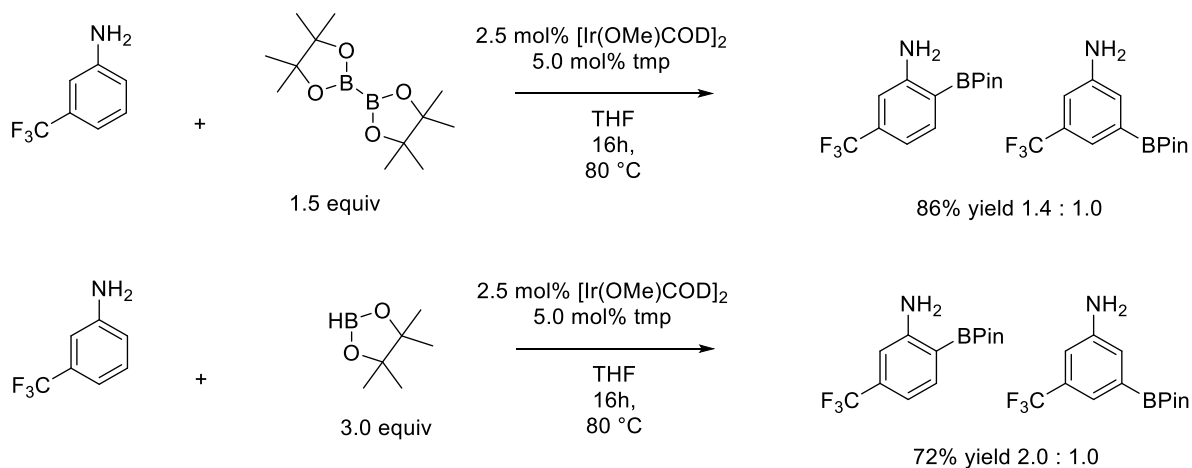

In a nitrogen filled glovebox, 124  $\mu\text{L}$  3-(trifluoromethyl)aniline (1.0 mmol, 1.0 equiv) and 48 mg dodecahydrotriphenylene (0.20 mmol, 0.2 equiv) internal standard was dissolved in 1 mL THF in a 15 mL pressure tube containing a magnetic stir bar. 2.5  $\mu\text{mol}$   $[\text{Ir}(\text{OMe})\text{COD}]_2$  (2.5 mol%) and 5.0  $\mu\text{mol}$  3,4,7,8-tetramethyl-1,10-phenanthroline (5.0 mol%) were added followed by an additional 1.5 equiv  $\text{B}_2\text{pin}_2$  (381 mg) and the reaction vessel was sealed and heated at 80  $^\circ\text{C}$  for 16 h. The reaction mixture was allowed to return to room temperature and the reaction mixture was exposed to air and diluted with 5 mL MeOH. Volatiles were removed and isomer ratios were determined by  $^1\text{H}$  NMR (*ortho* : *meta*; 1.4 : 1.0).

In a nitrogen filled glovebox, 124  $\mu\text{L}$  3-(trifluoromethyl)aniline (1.0 mmol, 1.0 equiv) and 48 mg dodecahydrotriphenylene (0.20 mmol, 0.2 equiv) internal standard was dissolved in 1 mL THF in a 15 mL pressure tube containing a magnetic stir bar. 1.5 equiv HBpin (218  $\mu\text{L}$ ) was added and the reaction vessel was sealed and stirred at room temperature for 1 h. 2.5  $\mu\text{mol}$   $[\text{Ir}(\text{OMe})\text{COD}]_2$  (2.5 mol%) and 5.0  $\mu\text{mol}$  3,4,7,8-tetramethyl-1,10-phenanthroline (5.0 mol%) were added followed by an additional 1.5 equiv HBpin (218  $\mu\text{L}$ ) and the reaction vessel was sealed and heated at 80  $^\circ\text{C}$  for 16h. The reaction mixture was allowed to return to room temperature and the reaction mixture was exposed to air and diluted with 5 mL MeOH. Volatiles were removed and isomer ratios were determined by  $^1\text{H}$  NMR (*ortho* : *meta*; 2.0 : 1.0).

**General Procedures for Screening Iridium Catalyzed C-H Borylation Conditions with Varying Ligands, Borane and Solvent.** All reactions were conducted in a nitrogen filled glove-box. Reactions for high through-put screening were conducted in 8  $\times$  30 mm borosilicate glass shell vials arranged in 96 well metal blocks (Symyx) with magnetic stirring. Materials were dispensed to the vials whenever possible as solutions in the reaction solvent, otherwise in suitable solvents (in which the material was soluble in) via micro pipettors followed by evaporation of the solvent in vacuo in a Genevac<sup>TM</sup> centrifugal evaporator in the glove box. The reactions were heated via the metal 96 well blocks after sealing with a perfluoroelastomeric backed metal top plate screwed to the metal block. Analysis was accomplished by reversed phase HPLC (Zorbax Eclipse Plus C18, 1.8 micron, 4.6  $\times$  50 mm column eluted with 0.1% aq  $\text{H}_3\text{PO}_4$  and acetonitrile) using an internal standard such as dodecahydrotriphenylene to facilitate quantitative HPLC solution assay yield determination or  $^1\text{H}$  NMR relative to internal standard.

**Borane and Solvent Effects Screen on Borylation of 3-chloroaniline.** In a nitrogen filled glove box, a 50  $\mu\text{L}$  of 0.01 M stock solutions of  $[\text{Ir}(\text{OMe})\text{COD}]_2$  in THF were added to a 1 mL reaction vial containing a magnetic stir bar. 50  $\mu\text{L}$  of a 0.02 M stock solution of dtbpy (1.0  $\mu\text{mol}$ ) or tmphen (1.0  $\mu\text{mol}$ ) in DCM was added to reaction vials containing  $[\text{Ir}(\text{OMe})\text{COD}]_2$ . Volatiles were removed under reduced pressure. The reaction vials were then subjected to one set of three following conditions using stock solutions made up in THF, cyclohexane,  $\text{N}_3\text{N}$ -diisopropylethylamine, or NMP:

- 1) 100  $\mu\text{L}$  of a solution of 22  $\mu\text{mol}$   $\text{B}_2\text{pin}_2$  (0.22 M) in the reaction solvent was added via micropipette.
- 2) 100  $\mu\text{L}$  of a solution of 44  $\mu\text{mol}$   $\text{B}_2\text{pin}_2$  (0.44 M) in the reaction solvent was added via micropipette.
- 3) 100  $\mu\text{L}$  of a solution containing 22  $\mu\text{mol}$  HBpin (0.22 M) and 22  $\mu\text{mol}$   $\text{B}_2\text{pin}_2$  (0.22 M) in the reaction solvent was added via micropipette.

Then, 100  $\mu\text{L}$  of a 0.2 M stock solution containing 3-chloroaniline (20  $\mu\text{mol}$ ) and 2.0  $\mu\text{mol}$  dodecahydrotriphenylene internal standard in reaction solvent was added to the reaction mixture. The

reaction vessel was then sealed and the reaction mixture stirred at 80 °C for 8 h. The reaction was then cooled to room temperature and quenched by exposure to atmospheric O<sub>2</sub> and dilution with MeOH. Volatiles were removed and assay yields were determined by <sup>1</sup>H NMR.

**Table S1.** Borane and Solvent Effects on Borylation of 3-chloroaniline.

| entry | ligand | solvent.     | equiv borane                                   | yield (%) | <i>ortho</i> ( <b>11p</b> , %) | <i>meta</i> ( <b>11p'</b> , %) | <i>diborylated</i> (%) | <b>11p</b> + <i>diborylated</i> : <b>11p'</b> |
|-------|--------|--------------|------------------------------------------------|-----------|--------------------------------|--------------------------------|------------------------|-----------------------------------------------|
| 1     | tmphen | THF          | 1.1 B <sub>2</sub> pin <sub>2</sub>            | 77        | 35                             | 32                             | 10                     | 1.4:1.0                                       |
| 2     | tmphen | Cyclohexane  | 1.1 B <sub>2</sub> pin <sub>2</sub>            | 79        | 51                             | 23                             | 5                      | 2.4:1.0                                       |
| 3     | tmphen | Hünig's Base | 1.1 B <sub>2</sub> pin <sub>2</sub>            | 71        | 45                             | 25                             | 1                      | 1.8:1.0                                       |
| 4     | tmphen | NMP          | 1.1 B <sub>2</sub> pin <sub>2</sub>            | 24        | 8                              | 16                             | 1                      | 1.0:1.8                                       |
| 5     | tmphen | THF          | 2.2 B <sub>2</sub> pin <sub>2</sub>            | 99        | 21                             | 58                             | 21                     | 1.0:1.4                                       |
| 6     | tmphen | Cyclohexane  | 2.2 B <sub>2</sub> pin <sub>2</sub>            | 99        | 29                             | 38                             | 32                     | 1.6:1.0                                       |
| 7     | tmphen | Hünig's Base | 2.2 B <sub>2</sub> pin <sub>2</sub>            | 99        | 32                             | 50                             | 18                     | 1.0:1.0                                       |
| 8     | tmphen | NMP          | 2.2 B <sub>2</sub> pin <sub>2</sub>            | 74        | 22                             | 45                             | 8                      | 1.0:1.5                                       |
| 9     | tmphen | THF          | 1.1 B <sub>2</sub> pin <sub>2</sub> /1.1 HBpin | 99        | 31                             | 43                             | 25                     | 1.3:1.0                                       |
| 10    | tmphen | Cyclohexane  | 1.1 B <sub>2</sub> pin <sub>2</sub> /1.1 HBpin | 99        | 39                             | 26                             | 34                     | 2.8:1.0                                       |
| 11    | tmphen | Hünig's Base | 1.1 B <sub>2</sub> pin <sub>2</sub> /1.1 HBpin | 99        | 40                             | 27                             | 31                     | 2.6:1.0                                       |
| 12    | tmphen | NMP          | 1.1 B <sub>2</sub> pin <sub>2</sub> /1.1 HBpin | 96        | 31                             | 56                             | 8                      | 1.0:1.4                                       |
| 13    | dtbpy  | THF          | 1.1 B <sub>2</sub> pin <sub>2</sub>            | 67        | 23                             | 43                             | 1                      | 1.0:1.8                                       |
| 14    | dtbpy  | Cyclohexane  | 1.1 B <sub>2</sub> pin <sub>2</sub>            | 58        | 31                             | 27                             | 0                      | 1.2:1.0                                       |
| 15    | dtbpy  | Hünig's Base | 1.1 B <sub>2</sub> pin <sub>2</sub>            | 34        | 18                             | 16                             | 0                      | 1.1:1.0                                       |
| 16    | dtbpy  | NMP          | 1.1 B <sub>2</sub> pin <sub>2</sub>            | 38        | 11                             | 27                             | 0                      | 1.0:2.6                                       |
| 17    | dtbpy  | THF          | 2.2 B <sub>2</sub> pin <sub>2</sub>            | 99        | 18                             | 71                             | 10                     | 1.0:2.5                                       |
| 18    | dtbpy  | Cyclohexane  | 2.2 B <sub>2</sub> pin <sub>2</sub>            | 99        | 31                             | 65                             | 3                      | 1.0:2.0                                       |
| 19    | dtbpy  | Hünig's Base | 2.2 B <sub>2</sub> pin <sub>2</sub>            | 99        | 33                             | 65                             | 2                      | 1.0:1.9                                       |
| 20    | dtbpy  | NMP          | 2.2 B <sub>2</sub> pin <sub>2</sub>            | 84        | 17                             | 65                             | 2                      | 1.0:3.3                                       |
| 21    | dtbpy  | THF          | 1.1 B <sub>2</sub> pin <sub>2</sub> /1.1 HBpin | 95        | 36                             | 57                             | 2                      | 1.0:1.5                                       |
| 22    | dtbpy  | Cyclohexane  | 1.1 B <sub>2</sub> pin <sub>2</sub> /1.1 HBpin | 74        | 36                             | 37                             | 1                      | 1.0:1.0                                       |
| 23    | dtbpy  | Hünig's Base | 1.1 B <sub>2</sub> pin <sub>2</sub> /1.1 HBpin | 71        | 39                             | 33                             | 0                      | 1.2:1.0                                       |
| 24    | dtbpy  | NMP          | 1.1 B <sub>2</sub> pin <sub>2</sub> /1.1 HBpin | 77        | 19                             | 56                             | 2                      | 1.0:2.6                                       |

## $^1\text{H}$ and $^{13}\text{C}$ NMR of 5-chloro-2,4-bis(4,4,5,5-tetramethyl-1,3,2-dioxaborolan-2-yl)aniline

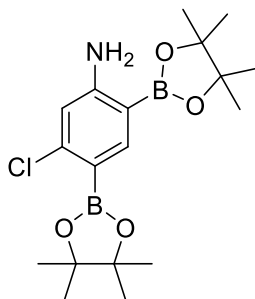

$^1\text{H}$  NMR (500 MHz,  $\text{CDCl}_3$ )  $\delta$  7.96 (s, 1H), 6.56 (s, 1H), 4.97 (br s, 2H), 1.34 (s, 12H), 1.33 (s, 12H);  $^{13}\text{C}$  NMR (125 MHz,  $\text{CDCl}_3$ )  $\delta$  156.5, 146.3, 144.6, 114.9, 83.6, 83.4, 24.9, 24.8.

**Polar Solvent Screen with 3-(trifluoromethyl)aniline.** In a nitrogen filled glove box, 1 mmol 3-(trifluoromethyl)aniline was dissolved in 1 mL NMP, DMA or 1.26 g sulfolane in a 15 mL pressure tube containing a magnetic stir bar. 1.5 equiv HBpin (218  $\mu\text{L}$ ) was added and the reaction vessel was sealed and stirred at room temperature for 1 h. 0.25  $\mu\text{mol}$   $[\text{Ir}(\text{OMe})\text{COD}]_2$  (0.25 mol%), 1.0  $\mu\text{mol}$  3,4,7,8-tetramethyl-1,10-phenanthroline (1.0 mol%), and 100  $\mu\text{mol}$  dodecahydrotriphenylene (24 mg) internal standard and an additional 1.5 mmol HBpin (218  $\mu\text{L}$ ) and the reaction vessel was sealed and heated at 80  $^\circ\text{C}$  for 16 h. The reaction mixture was allowed to return to room temperature and the reaction mixture was exposed to air and diluted with 5 mL  $\text{H}_2\text{O}$ . The residue was extracted with DCM and dried under reduced pressure. The residue was dissolved in MTBE, and the solution was passed through a short  $\text{SiO}_2$  plug, which was washed with  $\sim 75$  mL of MTBE. Removal of the solvent under reduced pressure afforded the product.

**Table S2.** Solvent Screen for 3-(trifluoromethyl)anilines.

| entry | solvent   | yield (%) | <i>ortho</i> (%) | <i>meta</i> (%) | <i>ortho</i> : <i>meta</i> |
|-------|-----------|-----------|------------------|-----------------|----------------------------|
| 1     | Sulfolane | 0         | --               | --              | NA                         |
| 2     | NMP       | 89        | 27               | 62              | 1.0:2.3                    |
| 3     | DMA       | 36        | 10               | 26              | 1.0:2.6                    |

### Solvent Key for Table S2.

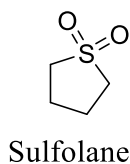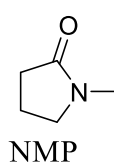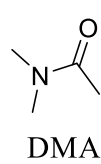

**Ligand Effects Screen on Borylation of 3-(trifluoromethyl)aniline.** Reaction was conducted in 8 × 30 mm borosilicate glass shell vials arranged in 24 well metal blocks (Symyx) with magnetic stirring. In a nitrogen filled glove box, a 50 μL of 0.01 M stock solutions of [Ir(OMe)COD]<sub>2</sub> (0.5 μmol) in THF were added to a 1 mL reaction vial containing a magnetic stir bar. 50 μL of a 0.02 M stock solution of ligand (1.0 μmol) in THF was added to reaction vials containing [Ir(OMe)COD]<sub>2</sub>. 50 μL of a solution of 30 μmol B<sub>2</sub>pin<sub>2</sub> (0.6 M) in THF was added via micropipette. Finally, 50 μL of a 0.2 M stock solution containing 3-(trifluoromethyl)aniline (20 μmol) and 2.0 μmol dodecahydrotriphenylene internal standard in THF was added to the reaction mixture. The reaction vessel was then sealed and stirred at 80 °C for 16 h. The reaction was then cooled to room temperature and quenched by exposure to atmospheric O<sub>2</sub> and dilution with MeOH. Volatiles were removed and assay yields were determined by <sup>1</sup>H NMR.

**Table S3.** Ligand Effects on Borylation of 3-(trifluoromethyl)anilines.

| entry | ligand | yield (%) | <i>ortho</i> (%) | <i>meta</i> (%) | <i>ortho</i> : <i>meta</i> |
|-------|--------|-----------|------------------|-----------------|----------------------------|
| 1     | dtbpy  | 80        | 42               | 38              | 1.1 : 1.0                  |
| 2     | dmabpy | 86        | 53               | 33              | 1.6 : 1.0                  |
| 3     | phen   | 73        | 30               | 42              | 1.0 : 1.4                  |
| 4     | tmphen | 86        | 50               | 36              | 1.4 : 1.0                  |
| 5     | diim   | 17        | 8                | 8               | 1.0 : 1.0                  |
| 6     | box    | 10        | 6                | 4               | 1.5 : 1.0                  |

**Ligand Key for Table S3.**

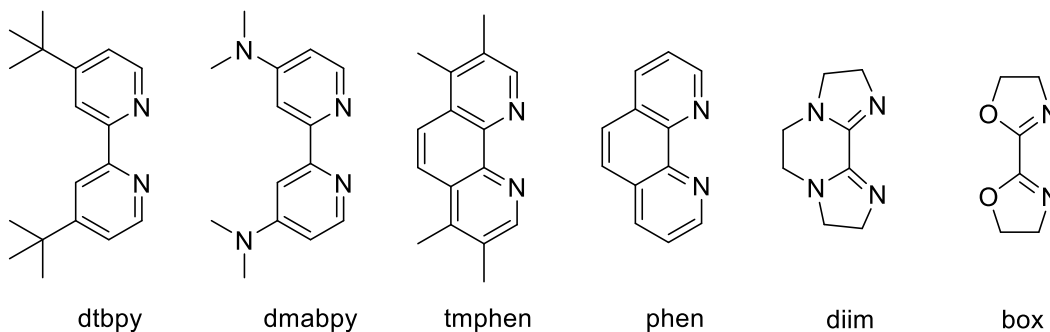

**Figure S1.** 2-methoxy-4-(4,4,5,5-tetramethyl-1,3,2-dioxaborolan-2-yl)-benzenamine. The following are 50% thermal ellipsoidal drawings of the molecule in the asymmetric cell with various amount of labeling.

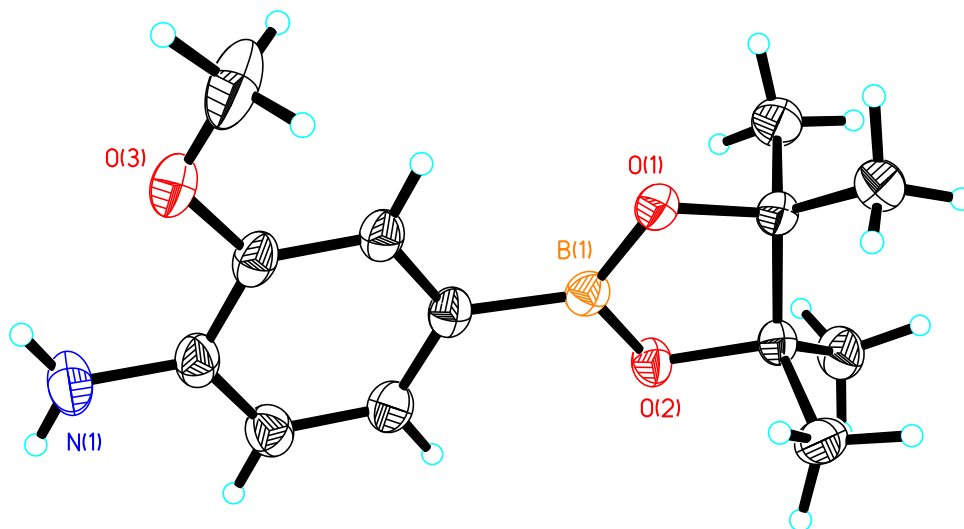

**Crystal structure determination of 2-methoxy-4-(4,4,5,5-tetramethyl-1,3,2-dioxaborolan-2-yl)-benzenamine. Crystal Data.**  $C_{13}H_{20}BNO_3$ ,  $M = 249.11$ , orthorhombic,  $a = 7.76150(10) \text{ \AA}$ ,  $b = 9.78630(10) \text{ \AA}$ ,  $c = 17.9222(2) \text{ \AA}$ ,  $V = 1371.31(3) \text{ \AA}^3$ ,  $T = 173(2) \text{ K}$ , space group  $P2_12_12_1$  (# 19),  $Z = 4$ ,  $\mu(\text{Cu K}\alpha) = 0.678 \text{ mm}^{-1}$ , 9806 reflections measured, 2457 unique ( $R_{\text{int}} = 0.0258$ ) which were used in all calculations. The final  $wR_2$  was 0.0842 (all data) an  $R_1$  was 0.0319 ( $>2\sigma(I)$ ).

### References

- 1) Kallepalli, V. A.; Shi, F.; Paul, S.; Onyeozili, E. N.; Maleczka, R. E., Jr.; Smith, M. R., III *J. Org. Chem.* **2009**, *74*, 9199
- 2) Takagi, J.; Sato, J.; Hartwig, J. F.; Ishiyama, T.; Miyaura, N. *Tetrahedron Lett.* **2002**, *43*, 5649
- 3) Wheaton, S. L.; Humanayun, S. M.; Zhang, H.; Vogels, C. M.; Decken, A.; Westcott, S. A. *Cent. Eur. J. Chem.* **2010**, *8*, 725.
- 4) S. Trofimenko, *J. Am. Chem. Soc.* **1967**, *89*, 4948-4952.

**<sup>1</sup>H NMR (500 MHz, DMSO-d<sub>6</sub>) 3-(4,4,5,5-tetramethyl-1,3,2-dioxaborolan-2-yl)-4-azaindole**

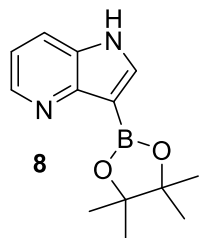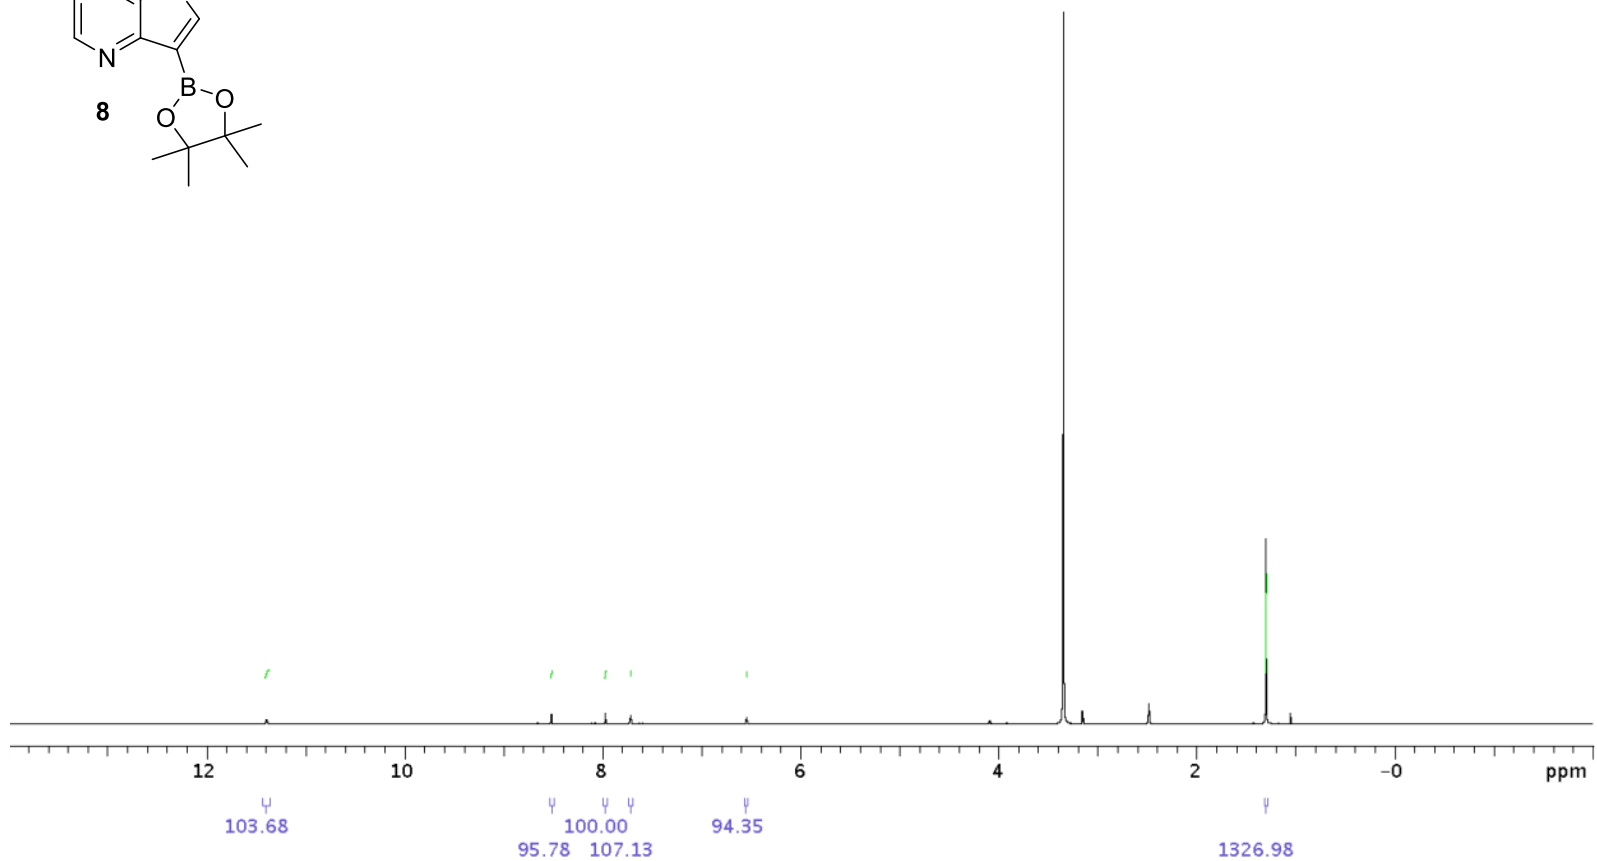



<sup>13</sup>C NMR (125 MHz, DMSO-d<sub>6</sub>) 3-(4,4,5,5-tetramethyl-1,3,2-dioxaborolan-2-yl)-4-azaindole

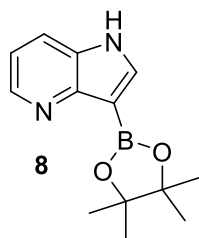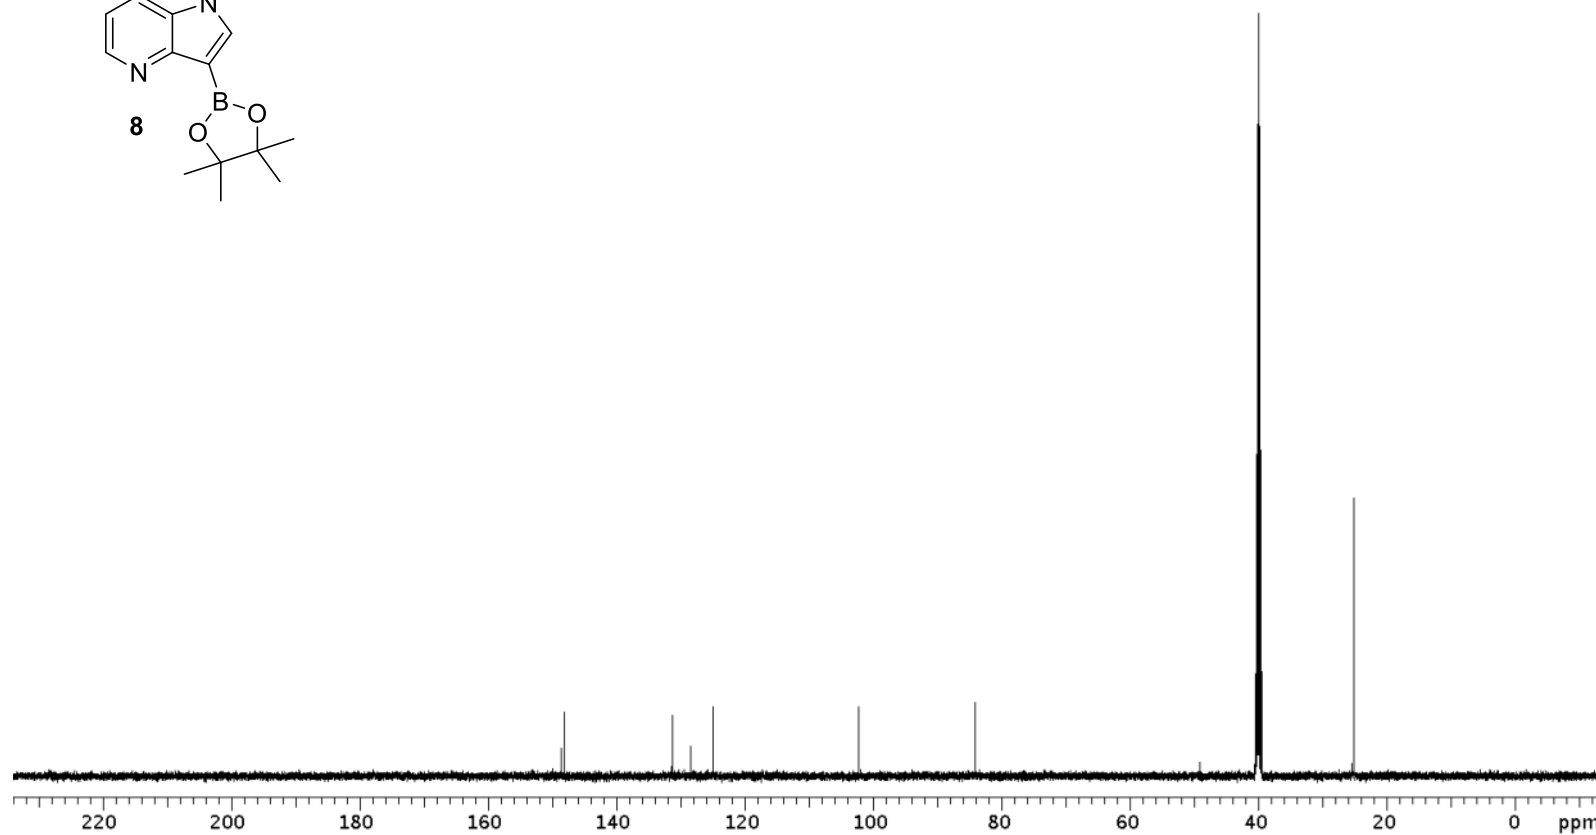

<sup>1</sup>H NMR (500 MHz, CDCl<sub>3</sub>) 3-(4,4,5,5-tetramethyl-1,3,2-dioxaborolan-2-yl)-7-azaindole

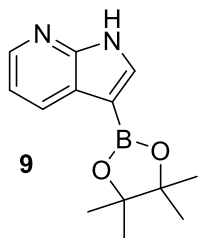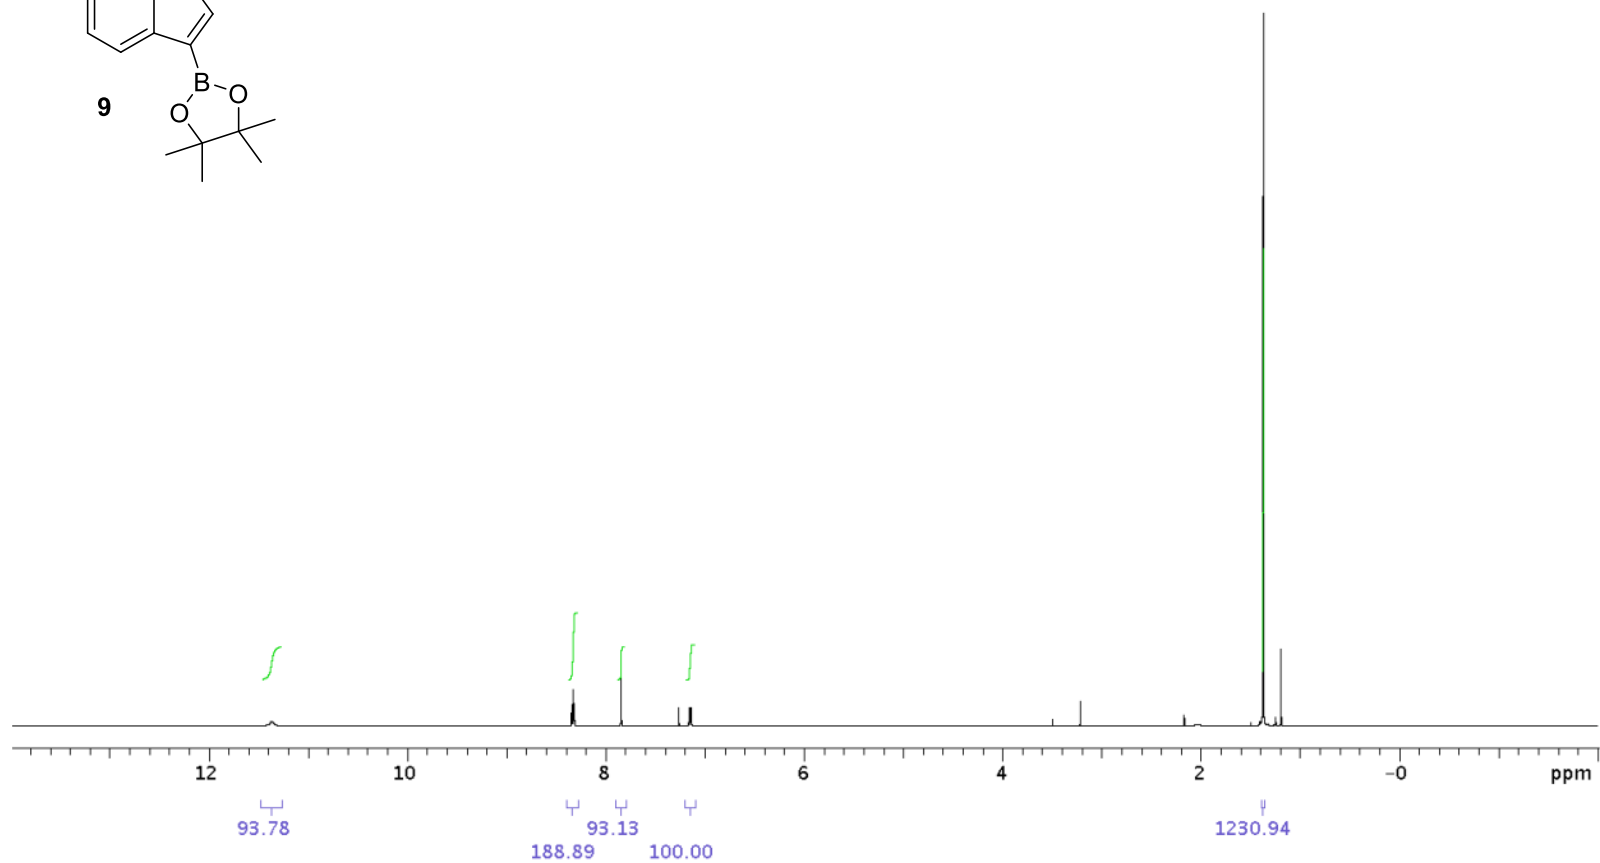

<sup>13</sup>C NMR (125 MHz, CDCl<sub>3</sub>) 3-(4,4,5,5-tetramethyl-1,3,2-dioxaborolan-2-yl)-7-azaindole

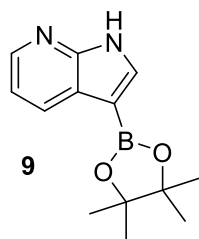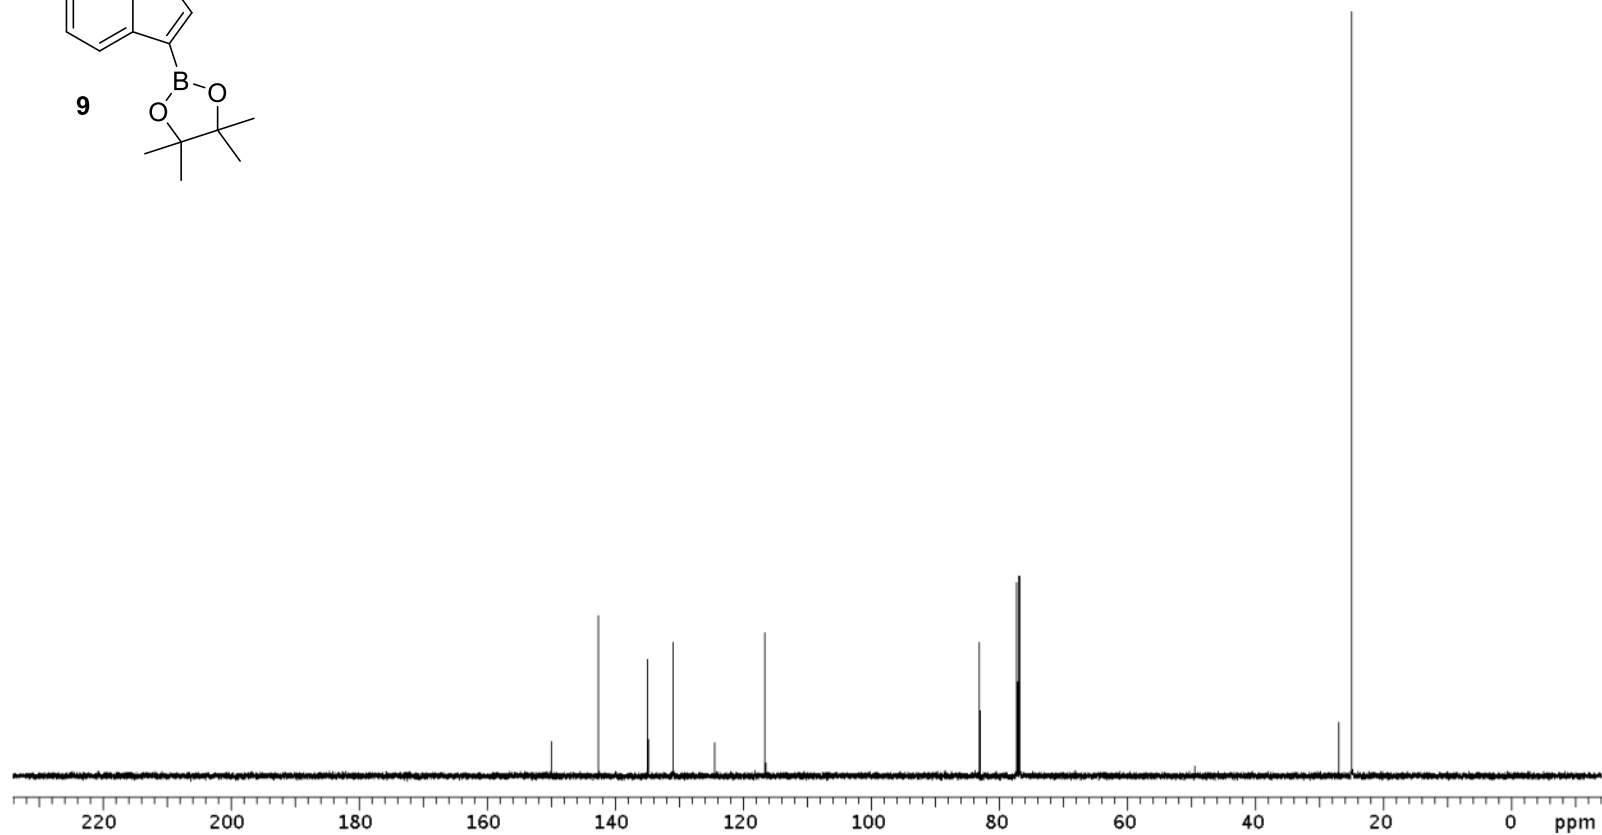

**<sup>1</sup>H NMR (500 MHz, CDCl<sub>3</sub>) 3,5-bis(4,4,5,5-tetramethyl-1,3,2-dioxaborolan-2-yl)-7-azaindole**

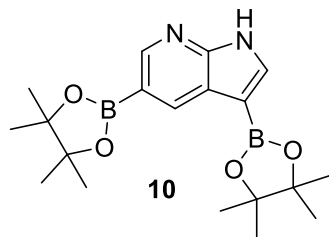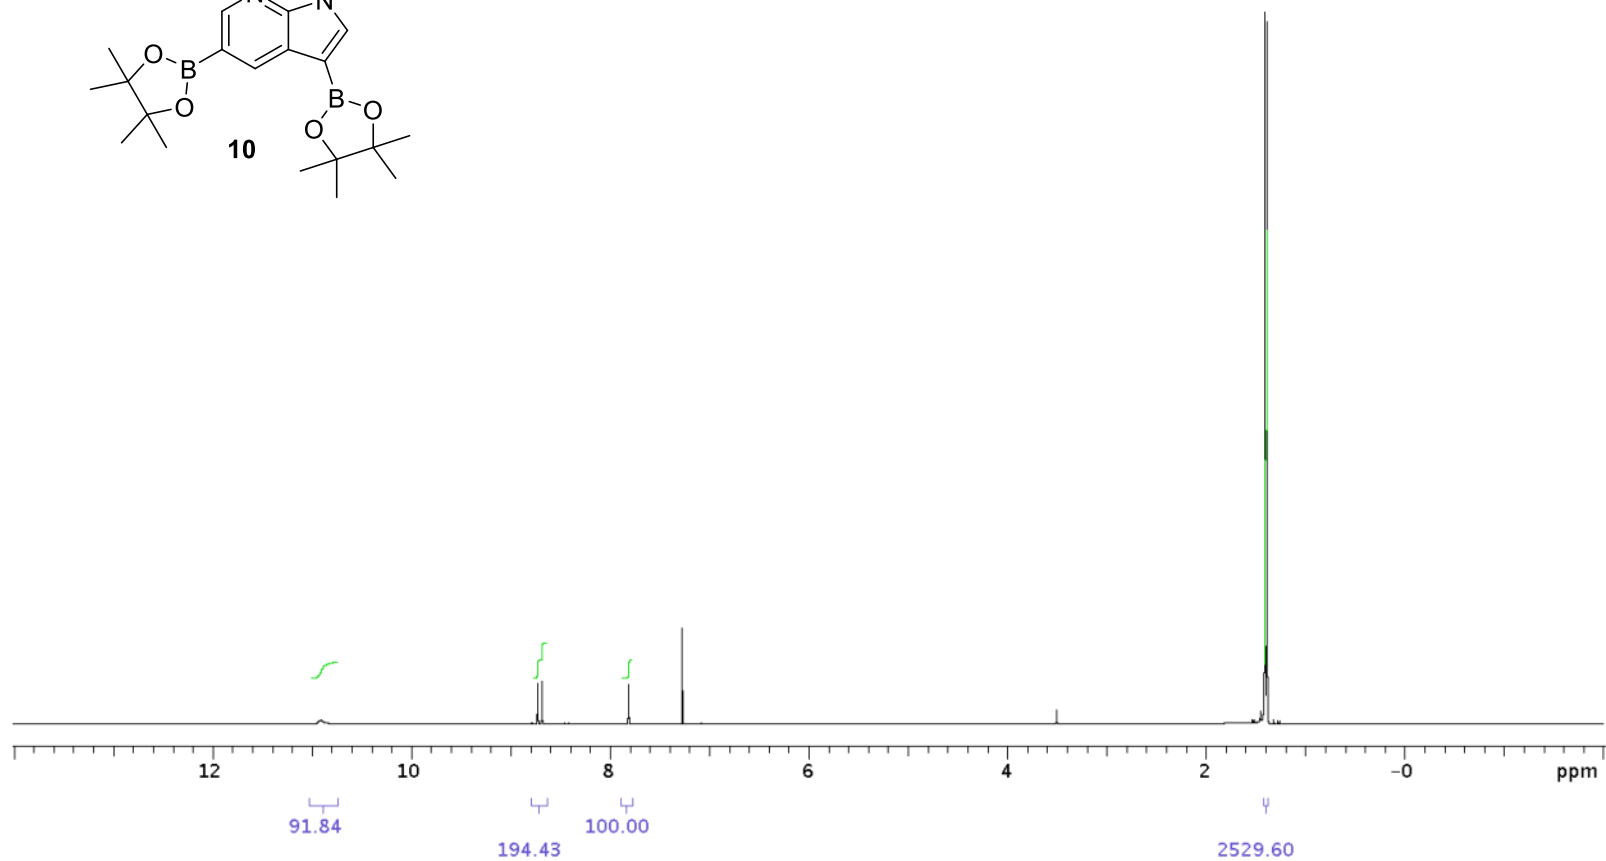

<sup>13</sup>C NMR (125 MHz, CDCl<sub>3</sub>) 3,5-bis(4,4,5,5-tetramethyl-1,3,2-dioxaborolan-2-yl)-7-azaindole

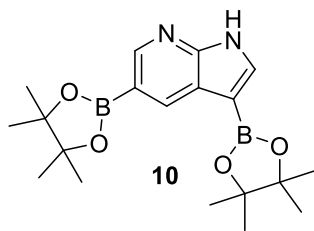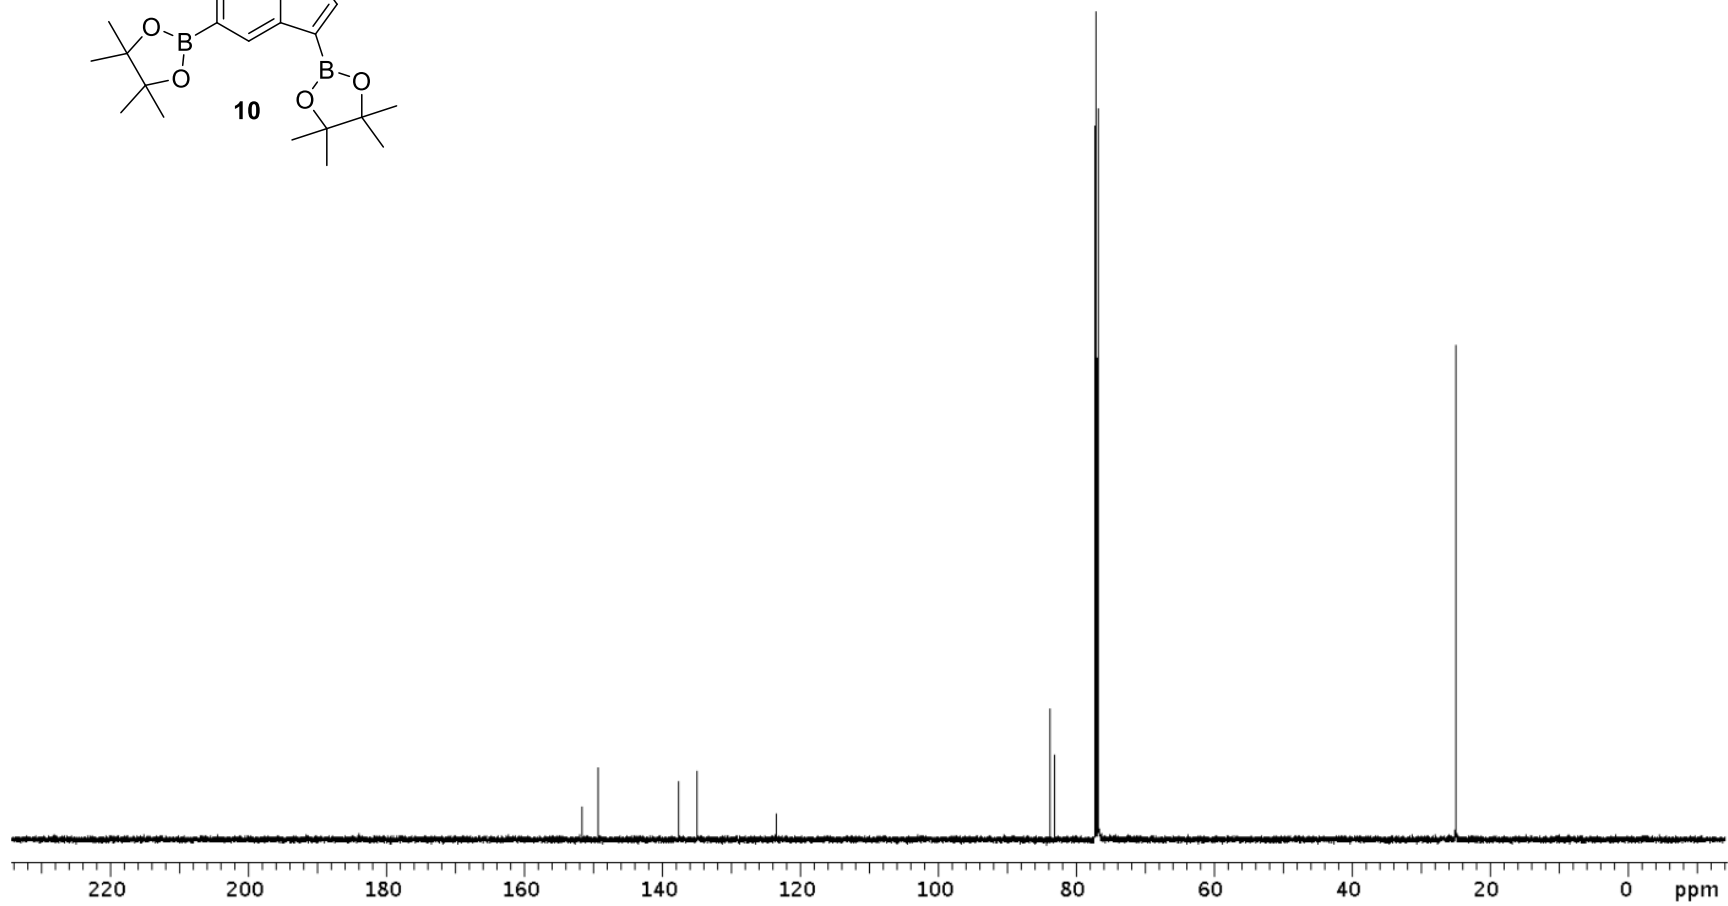

**<sup>1</sup>H NMR (500 MHz, CD<sub>2</sub>Cl<sub>2</sub>) 4-bromo-2-(4,4,5,5-tetramethyl-1,3,2-dioxaborolan-2-yl)-benzenamine**

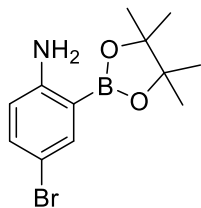

**11a**

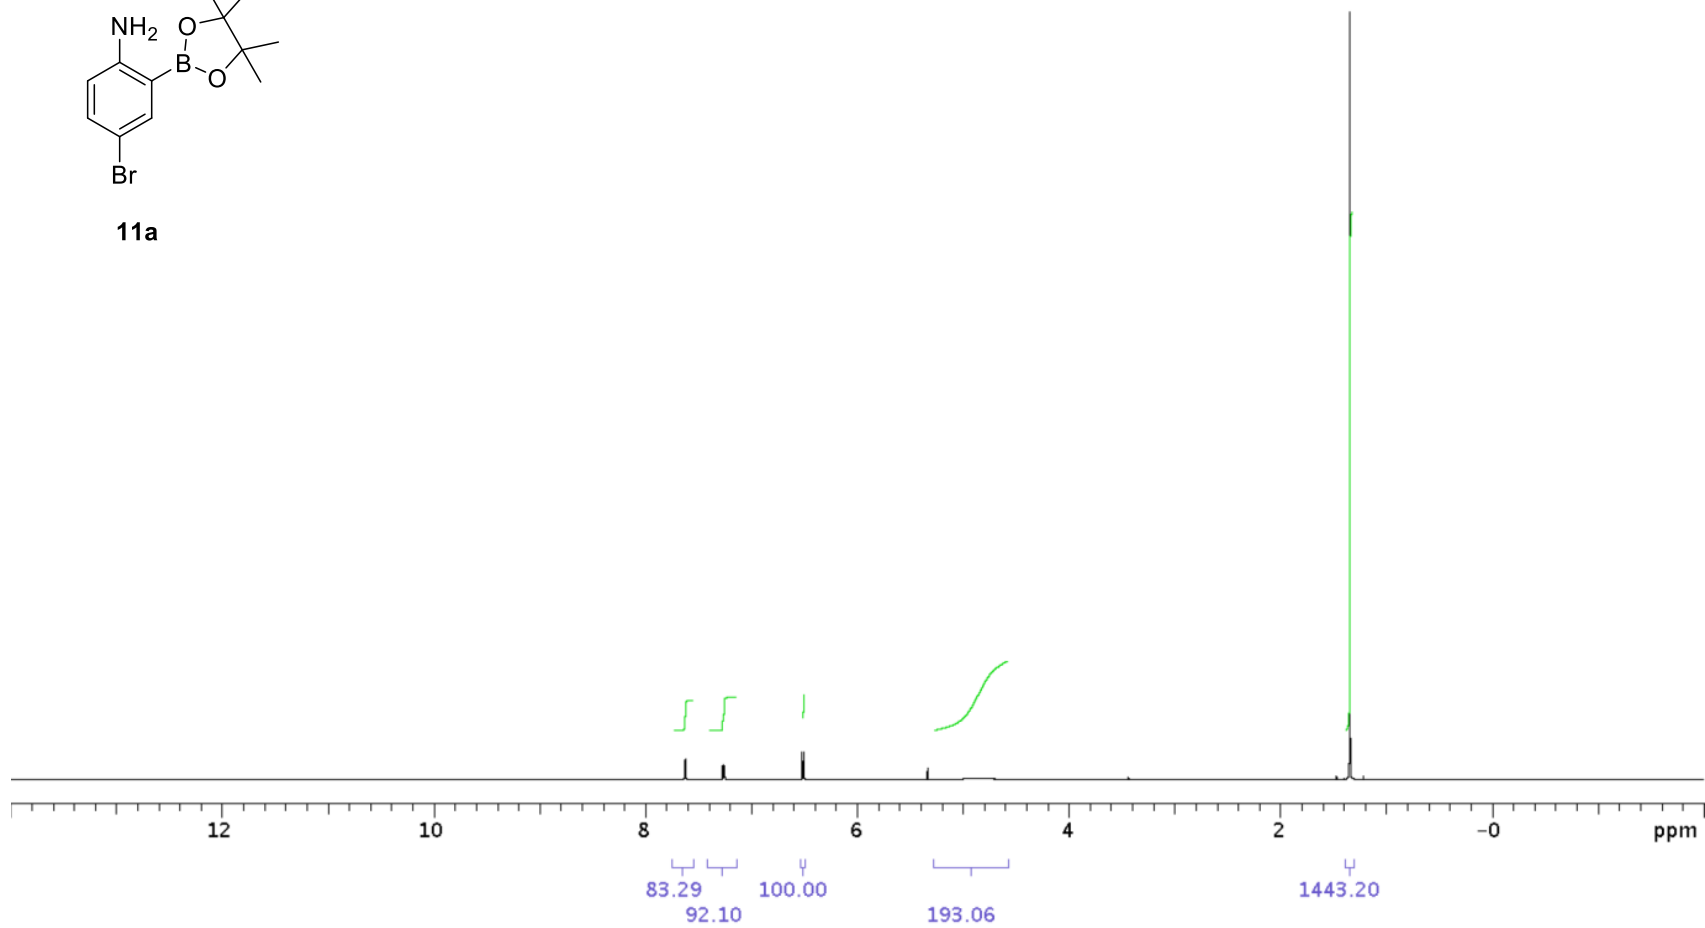

<sup>13</sup>C NMR (125 MHz, CD<sub>2</sub>Cl<sub>2</sub>) 4-bromo-2-(4,4,5,5-tetramethyl-1,3,2-dioxaborolan-2-yl)-benzenamine

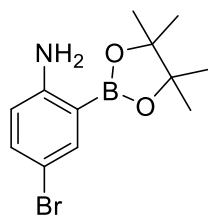

**11a**

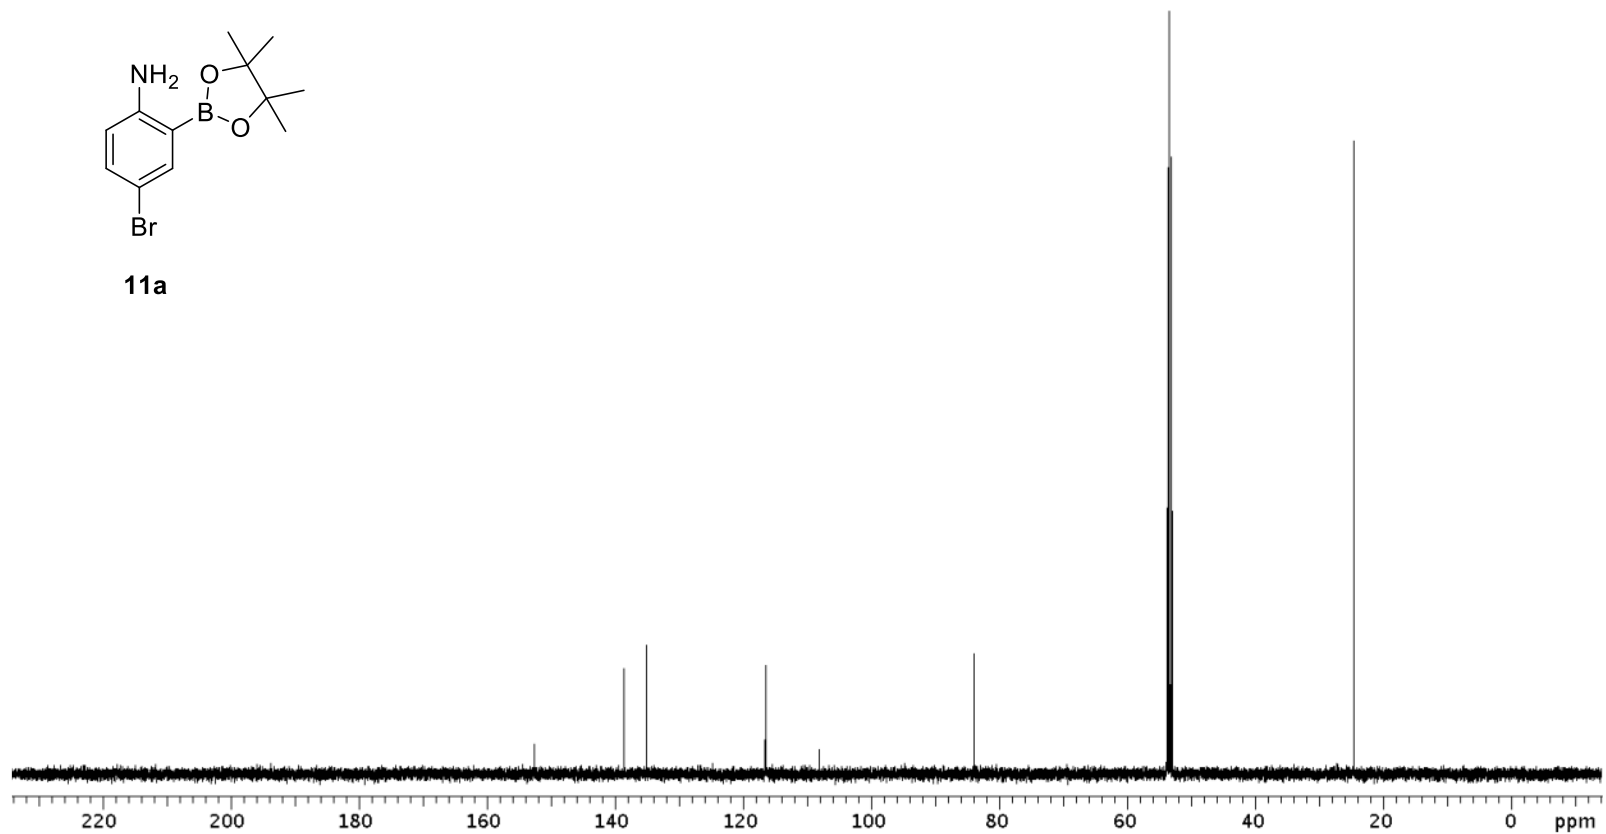

**<sup>1</sup>H NMR (500 MHz, CDCl<sub>3</sub>) 4-bromo-5-chloro-2-(4,4,5,5-tetramethyl-1,3,2-dioxaborolan-2-yl)-benzamine**

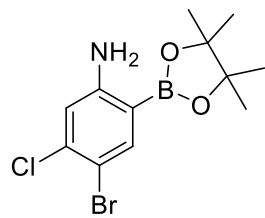

**11b**

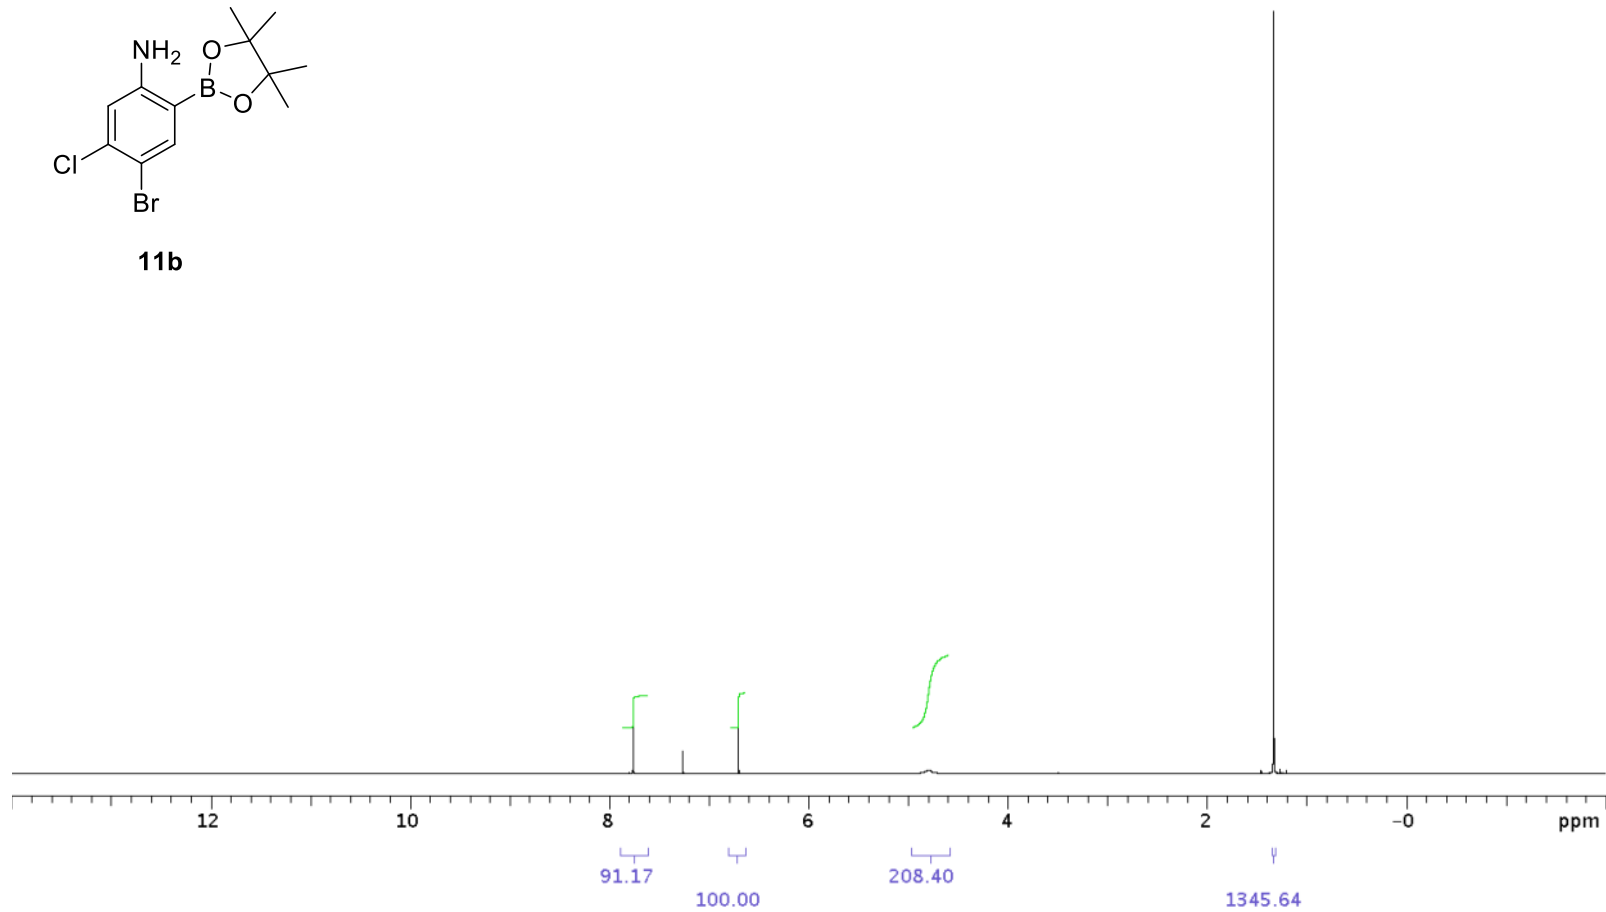



<sup>13</sup>C NMR (125 MHz, CDCl<sub>3</sub>) 4-bromo-5-chloro-2-(4,4,5,5-tetramethyl-1,3,2-dioxaborolan-2-yl)-benzamine

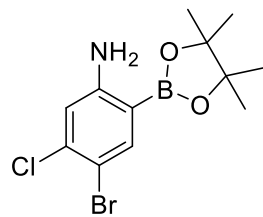

**11b**

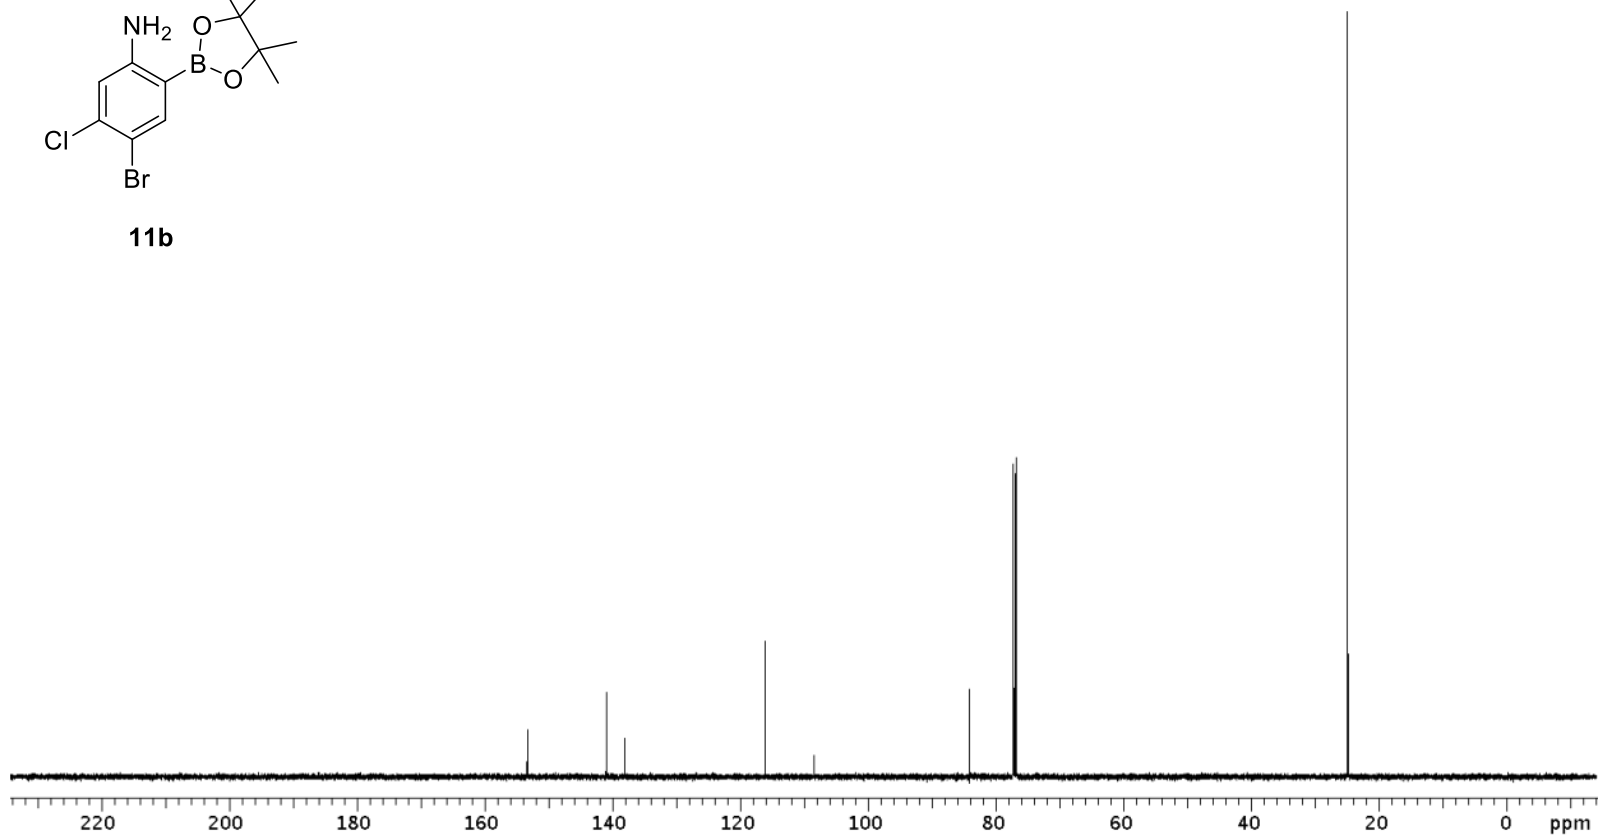

**<sup>1</sup>H NMR (500 MHz, CDCl<sub>3</sub>) 4-amino-2-chloro-5-(4,4,5,5-tetramethyl-1,3,2-dioxaborolan-2-yl)-phenol**

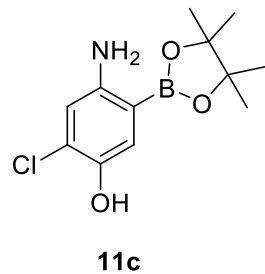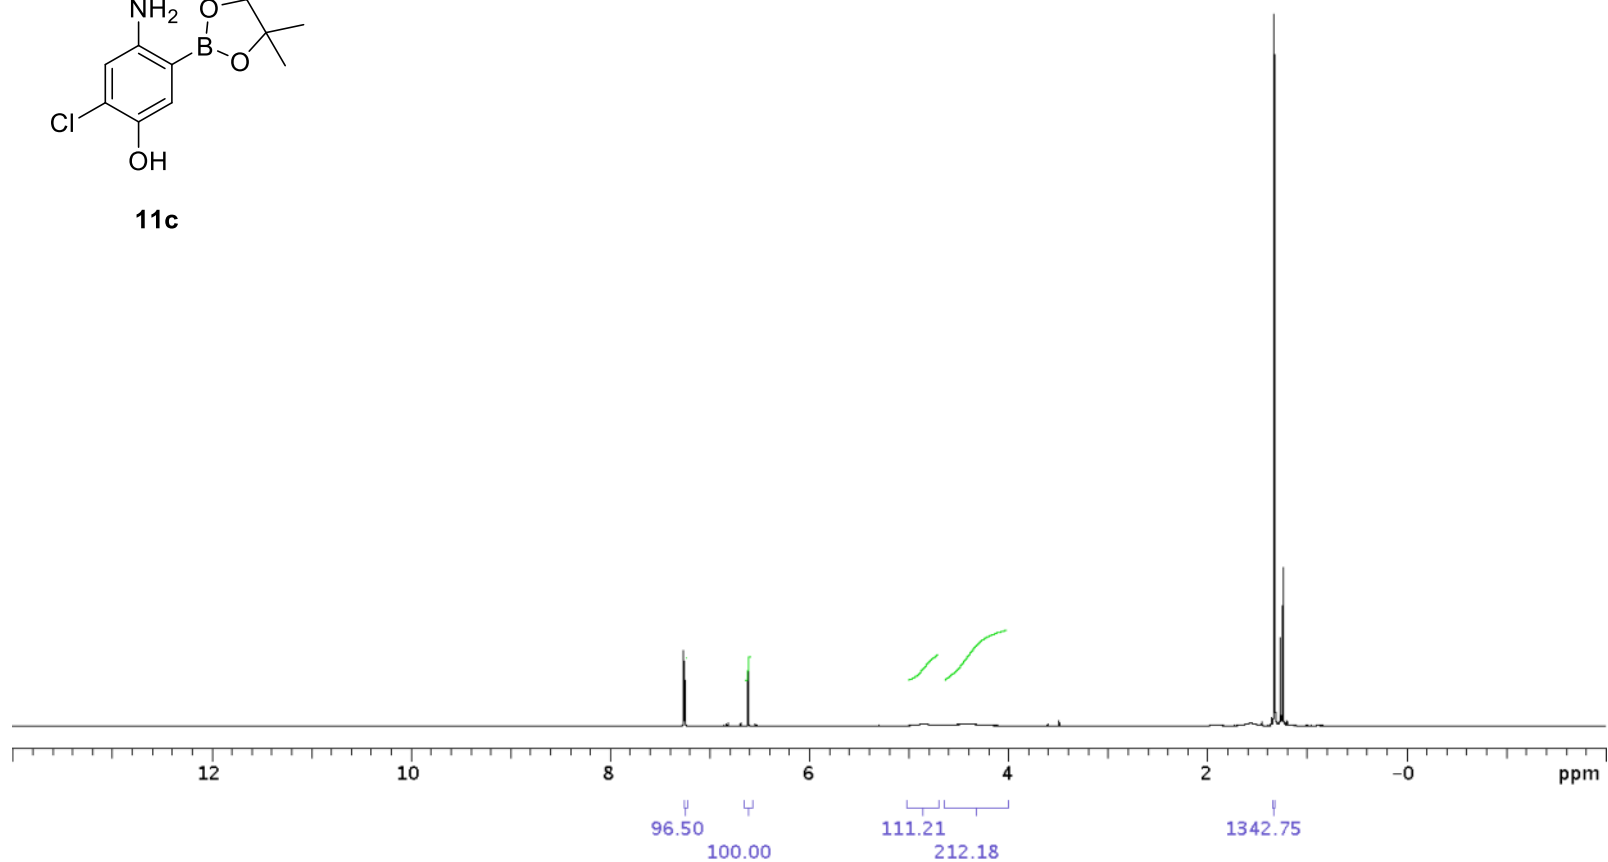

**$^{13}\text{C}$  NMR (125 MHz,  $\text{CDCl}_3$ ) 4-amino-2-chloro-5-(4,4,5,5-tetramethyl-1,3,2-dioxaborolan-2-yl)-phenol**

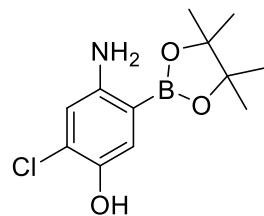

**11c**

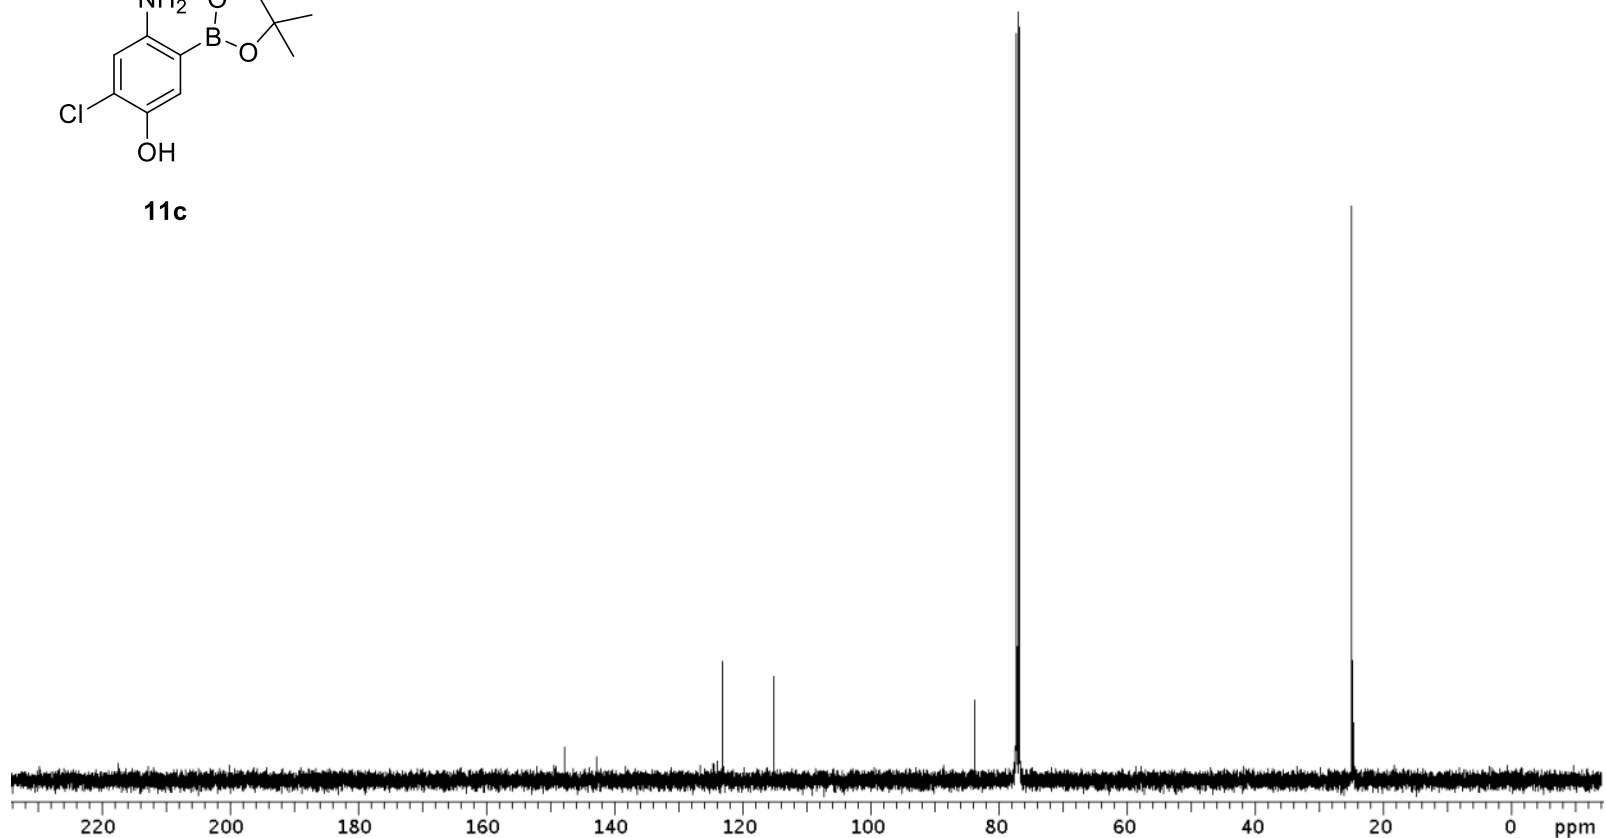

<sup>1</sup>H NMR (500 MHz, CDCl<sub>3</sub>) 2-(4,4,5,5-tetramethyl-1,3,2-dioxaborolan-2-yl)-4-(trifluoromethyl)-benzenamine

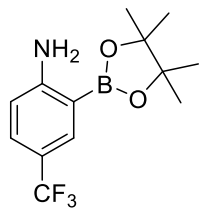

11d

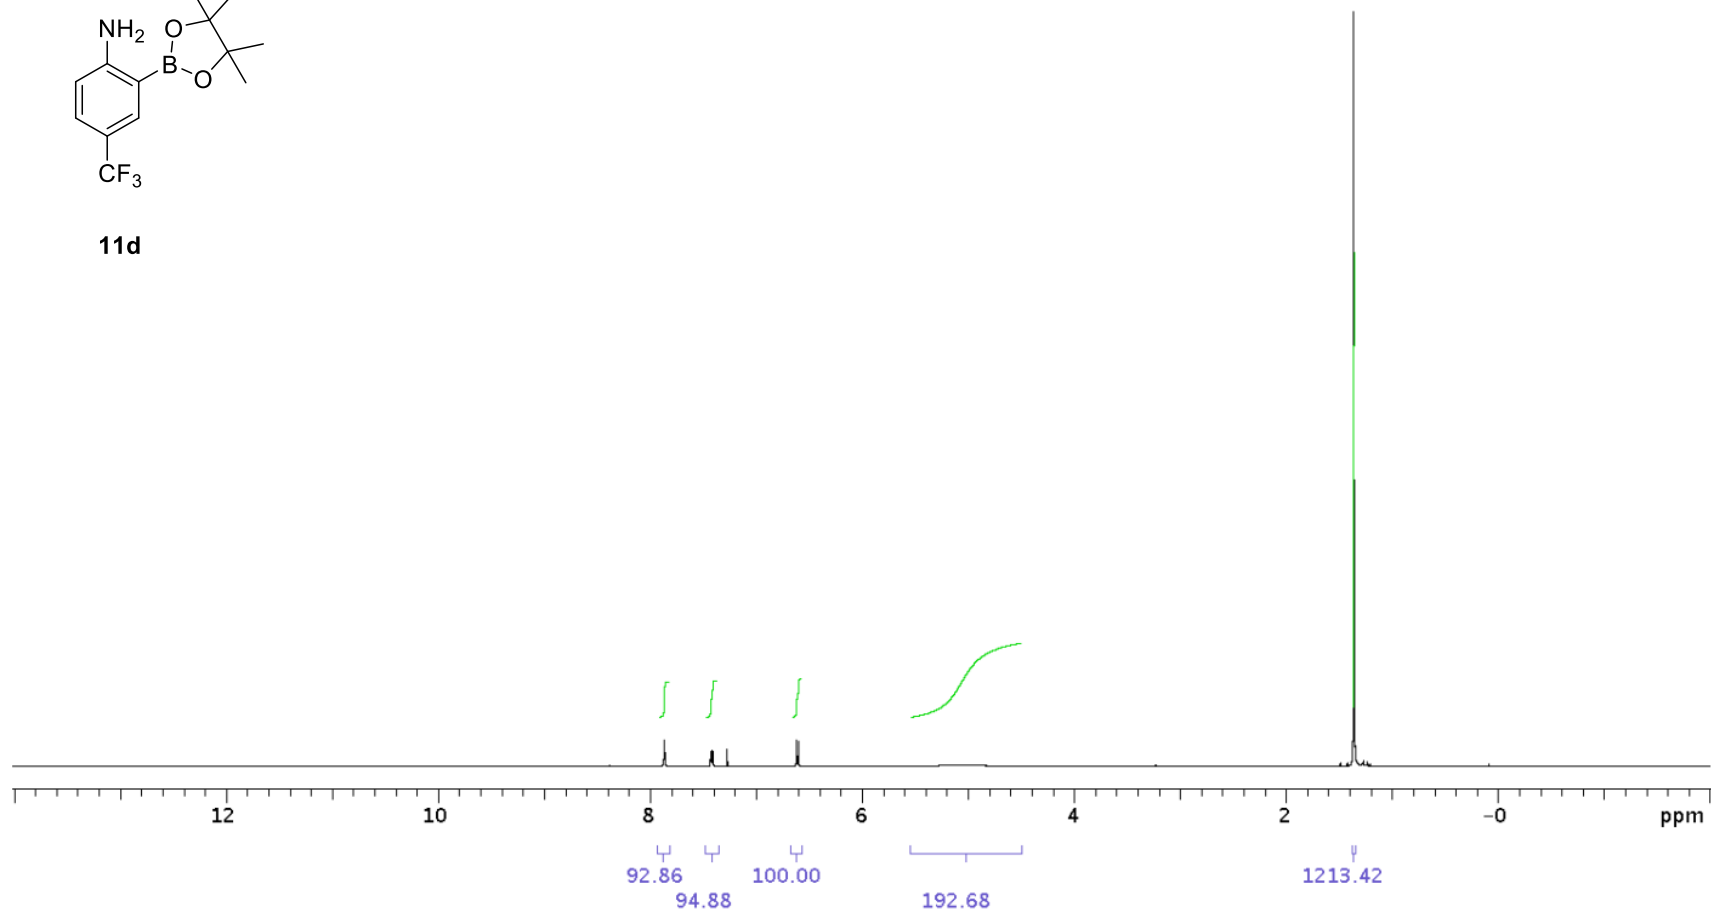

<sup>13</sup>C NMR (125 MHz, CDCl<sub>3</sub>) 2-(4,4,5,5-tetramethyl-1,3,2-dioxaborolan-2-yl)-4-(trifluoromethyl)-benzenamine

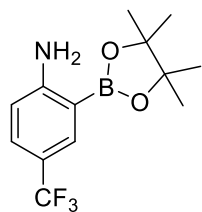

**11d**

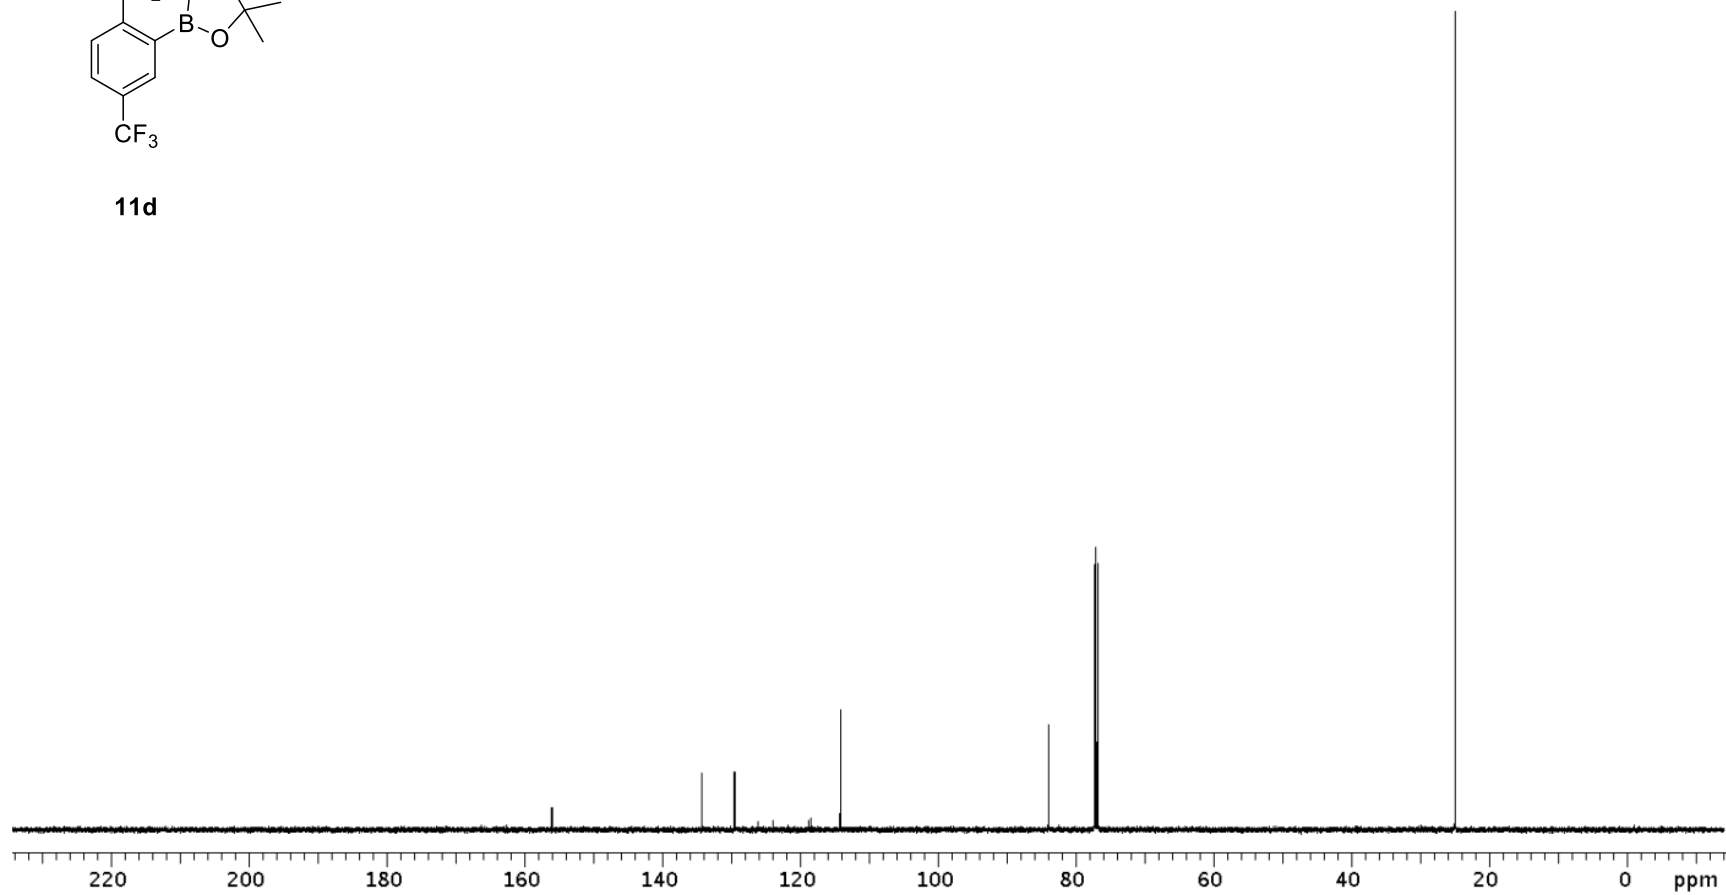

**<sup>1</sup>H NMR (500 MHz, CDCl<sub>3</sub>) 4-chloro-5-fluoro-2-(4,4,5,5-tetramethyl-1,3,2-dioxaborolan-2-yl)-benzamine**

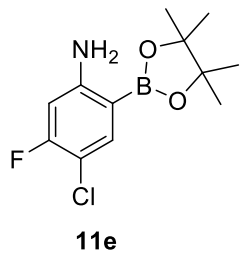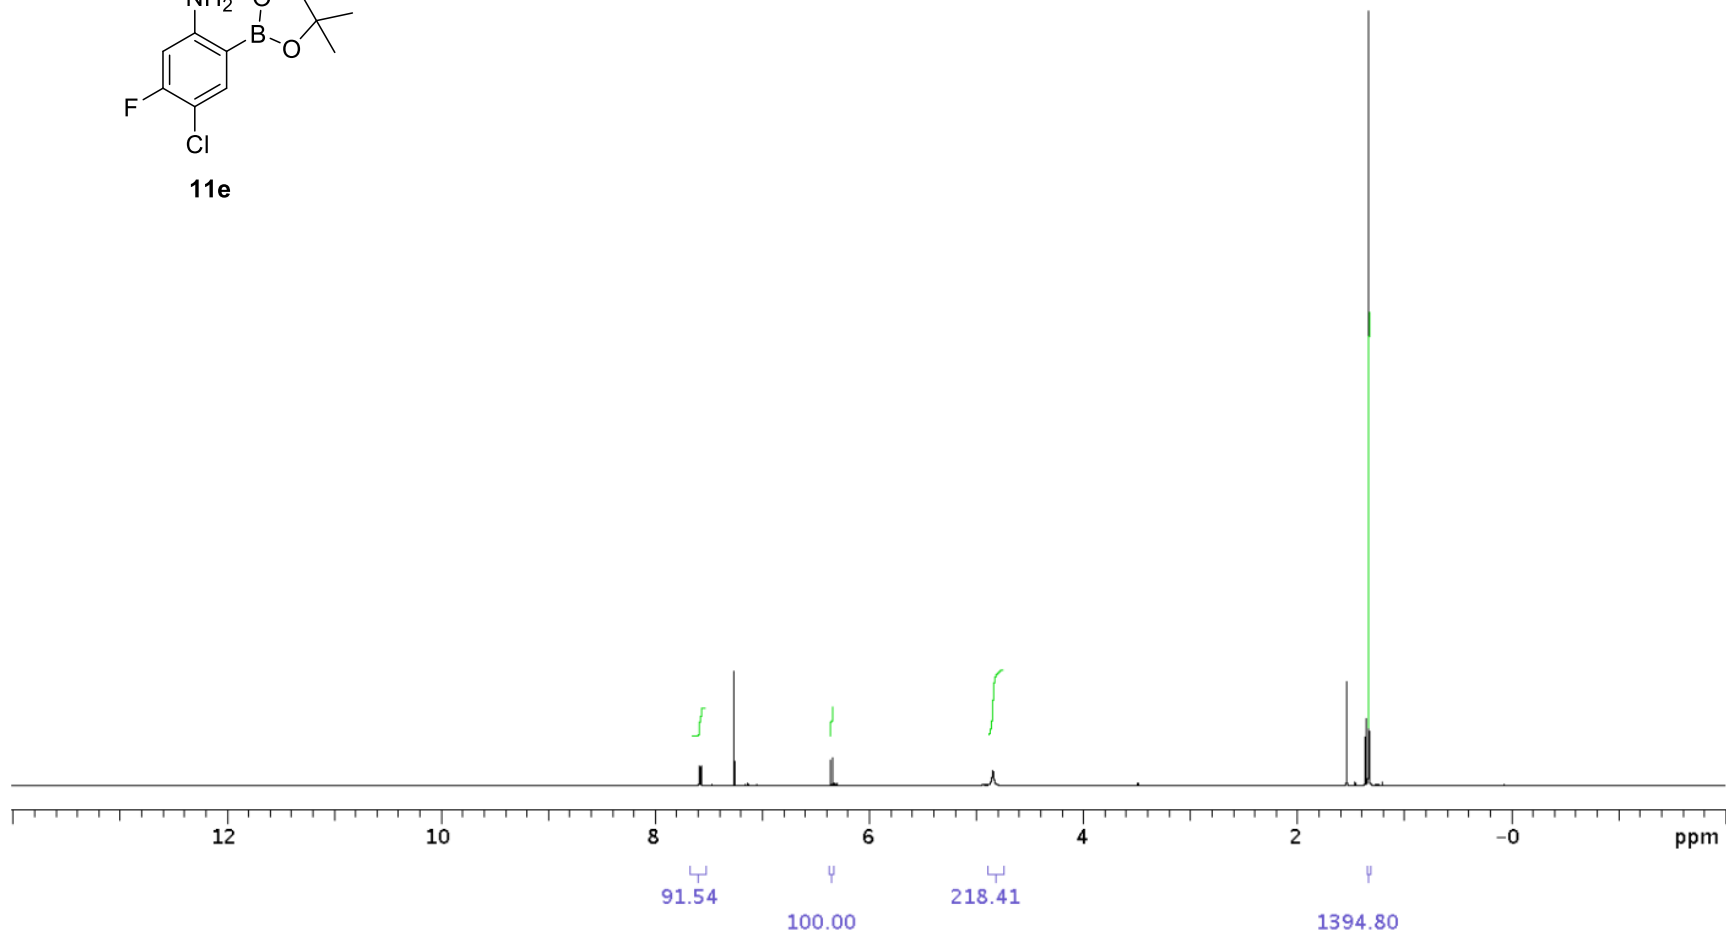

<sup>13</sup>C NMR (125 MHz, CDCl<sub>3</sub>) 4-chloro-5-fluoro-2-(4,4,5,5-tetramethyl-1,3,2-dioxaborolan-2-yl)-benzamine

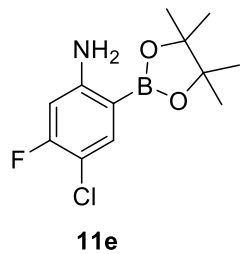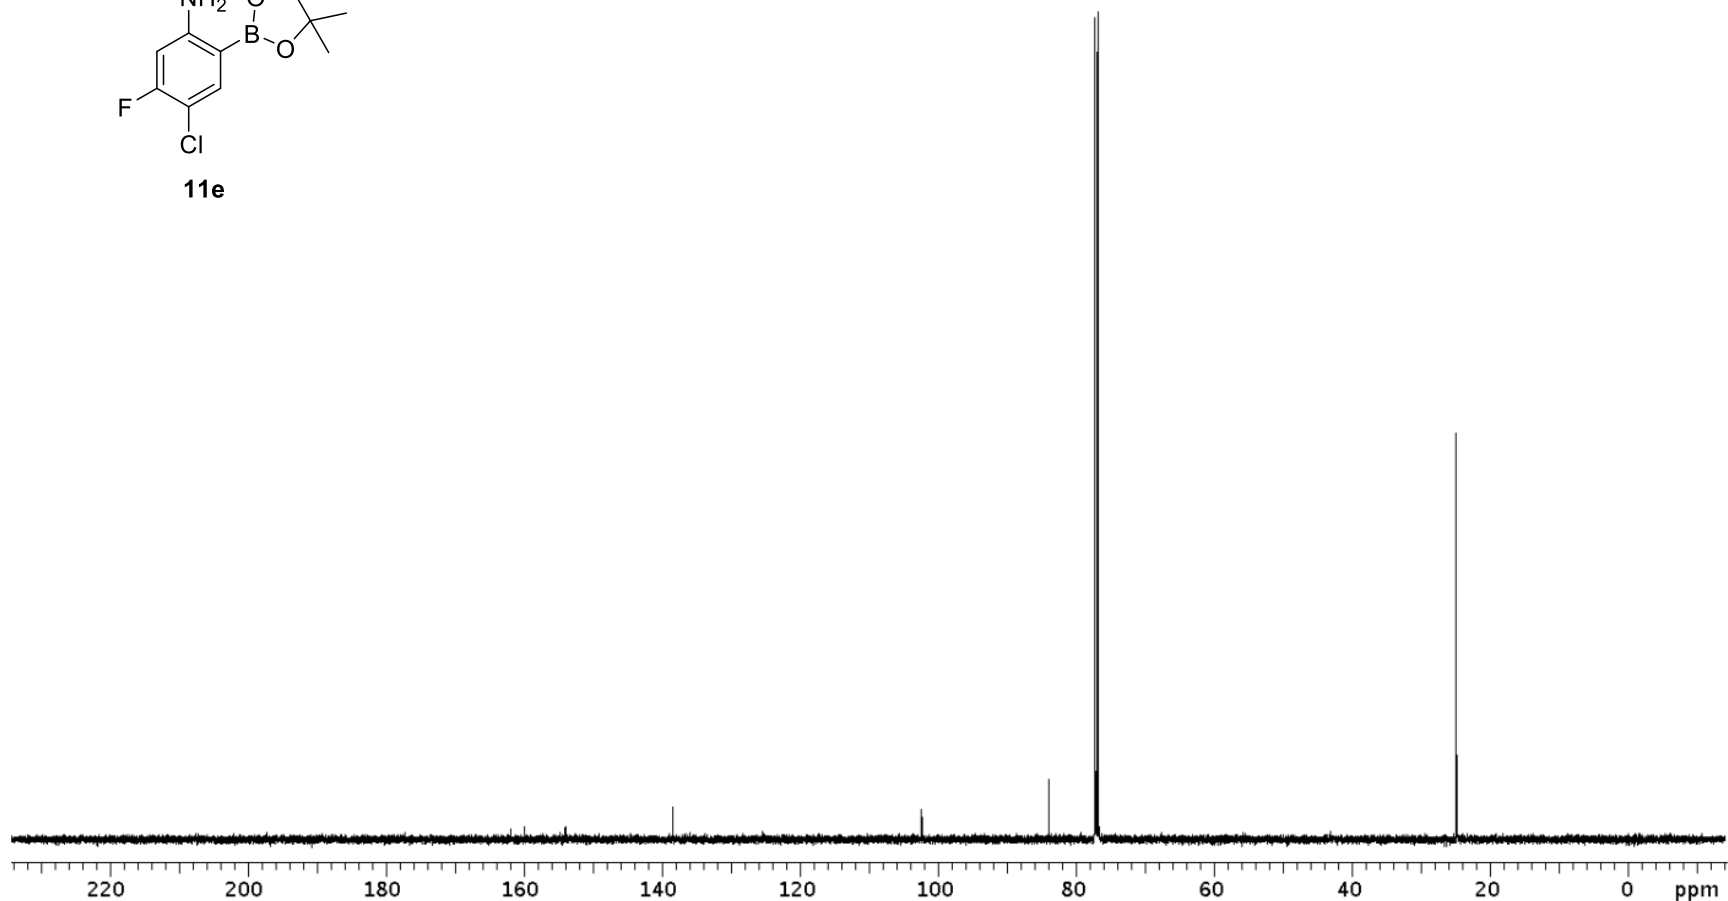

**<sup>1</sup>H NMR (500 MHz, CDCl<sub>3</sub>) 4-amino-3-(4,4,5,5-tetramethyl-1,3,2-dioxaborolan-2-yl)benzonitrile**

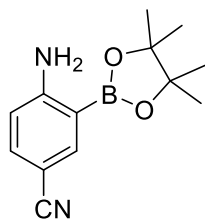

**11f**

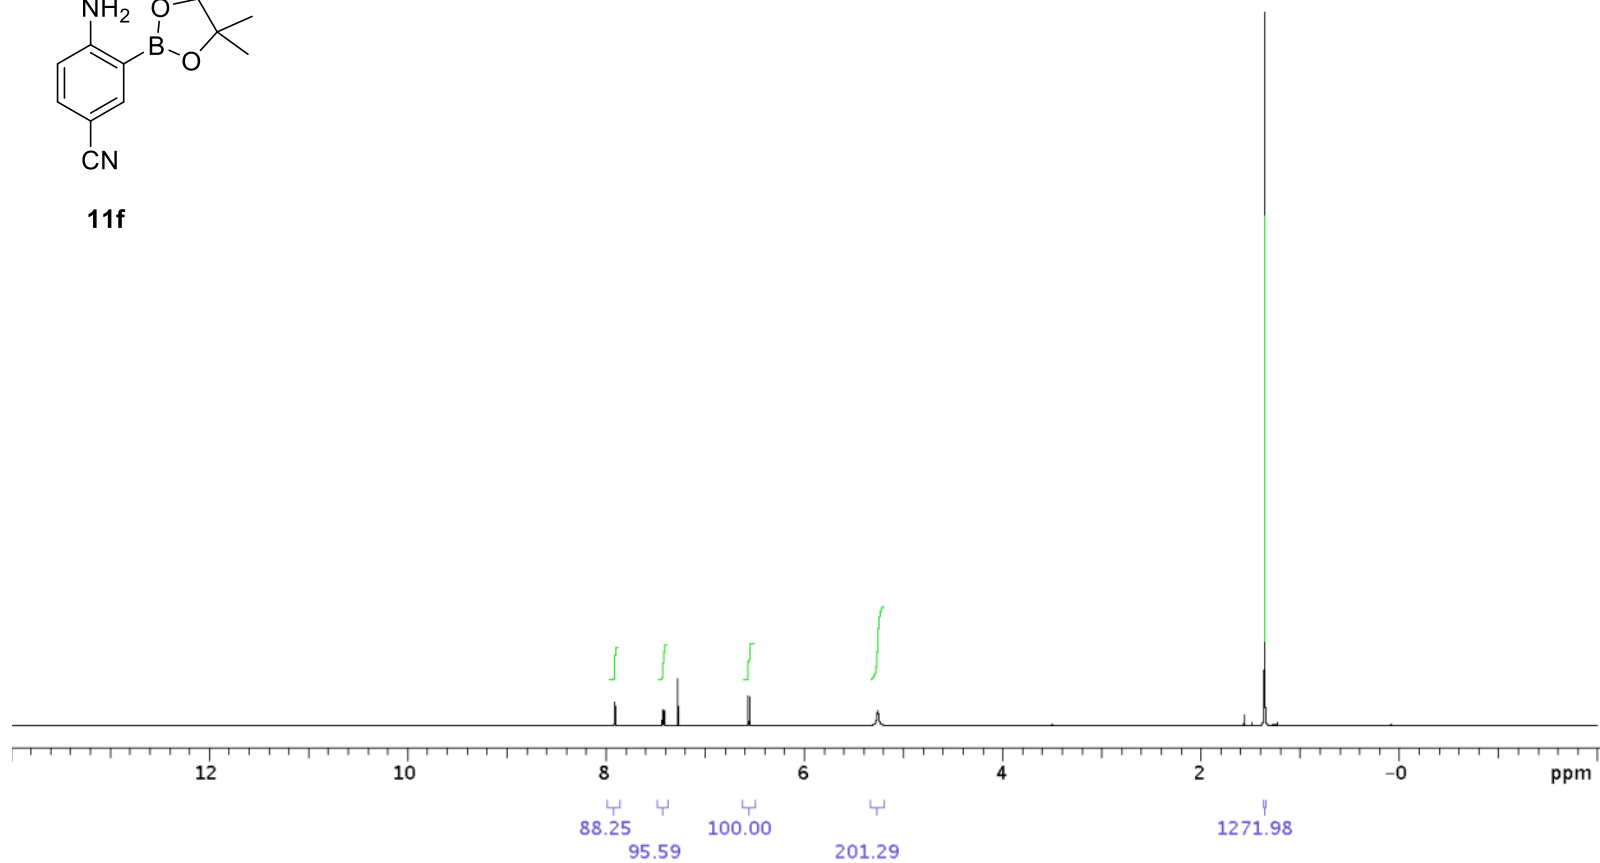



<sup>13</sup>C NMR (125 MHz, CDCl<sub>3</sub>) 4-amino-3-(4,4,5,5-tetramethyl-1,3,2-dioxaborolan-2-yl)benzonitrile

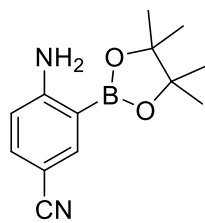

**11f**

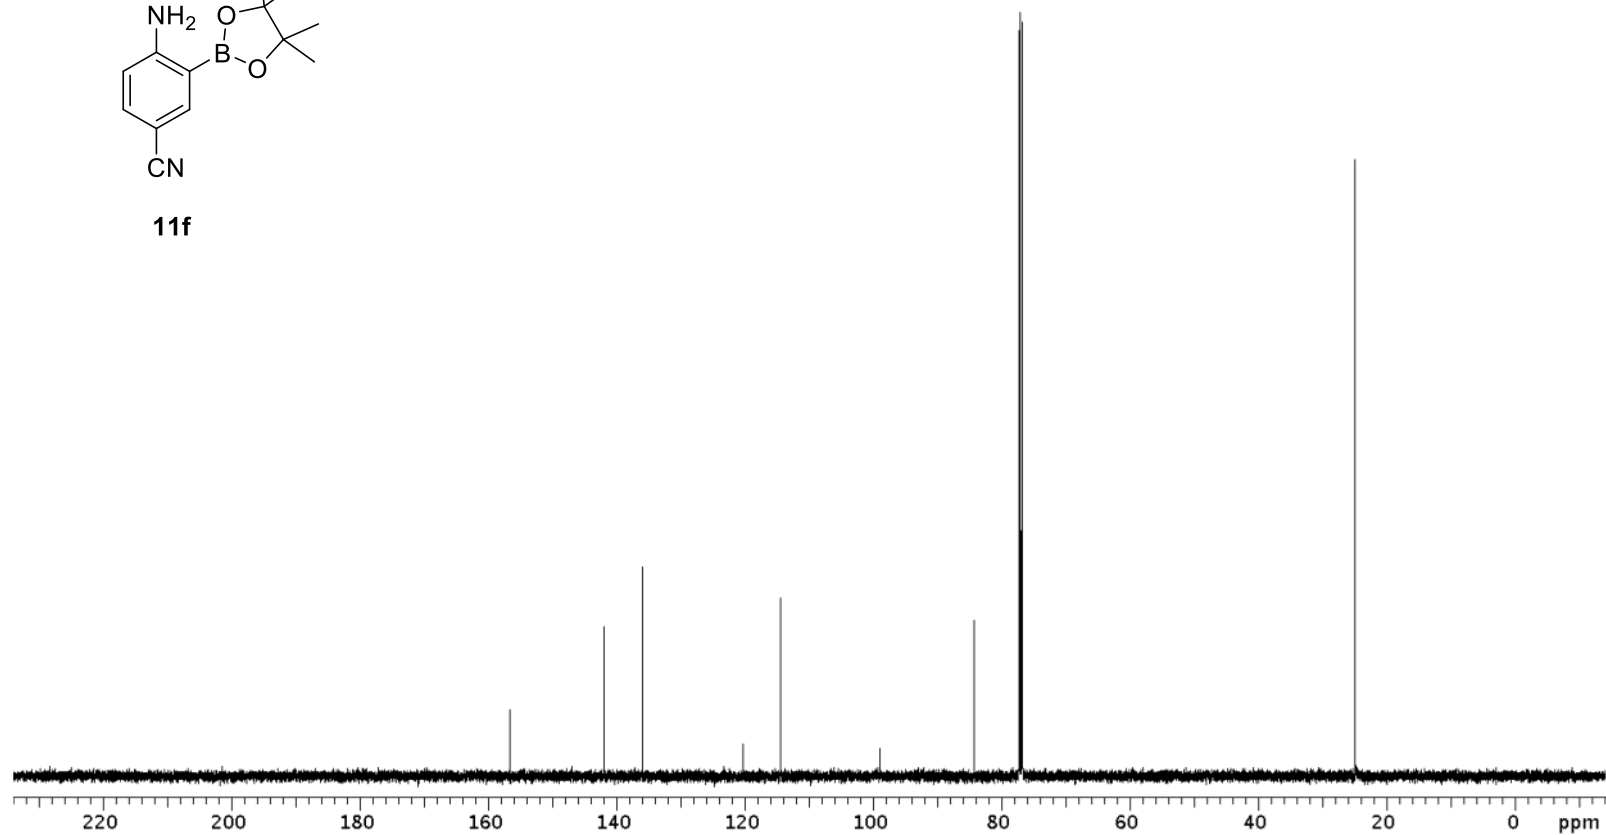

**<sup>1</sup>H NMR (500 MHz, CDCl<sub>3</sub>) 4-amino-3-(4,4,5,5-tetramethyl-1,3,2-dioxaborolan-2-yl)-phenol**

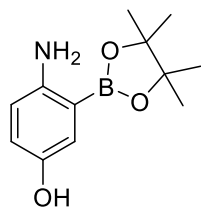

**11g**

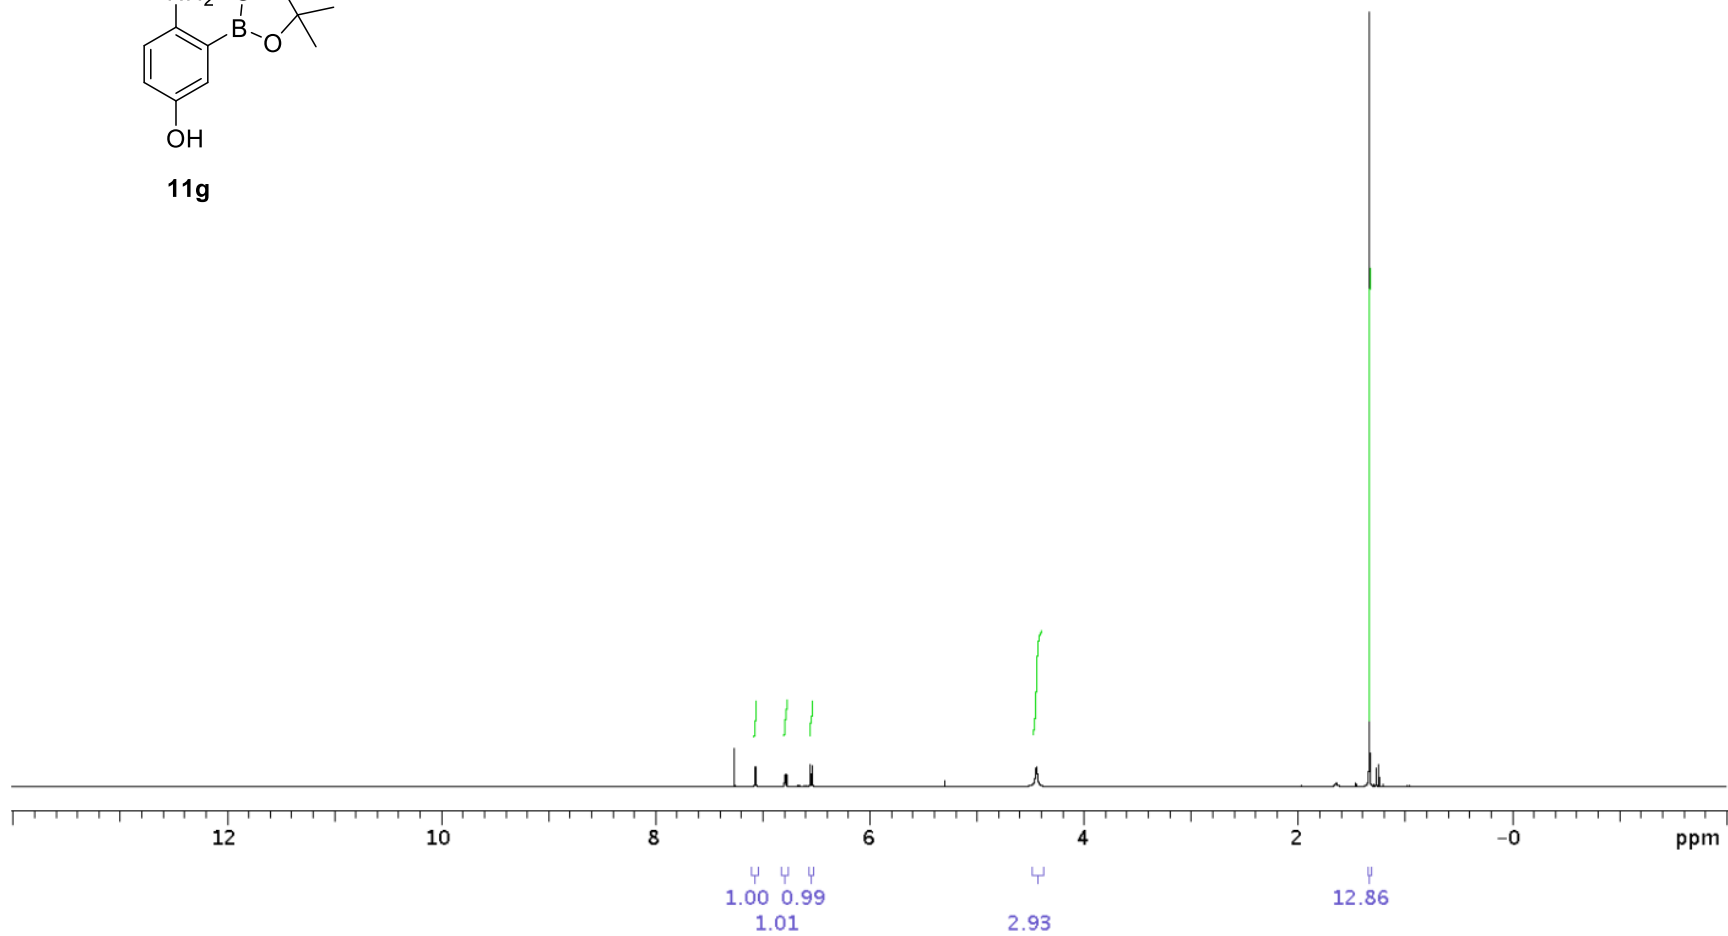

<sup>13</sup>C NMR (125 MHz, CDCl<sub>3</sub>) 4-amino-3-(4,4,5,5-tetramethyl-1,3,2-dioxaborolan-2-yl)-phenol

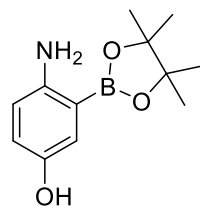

11g

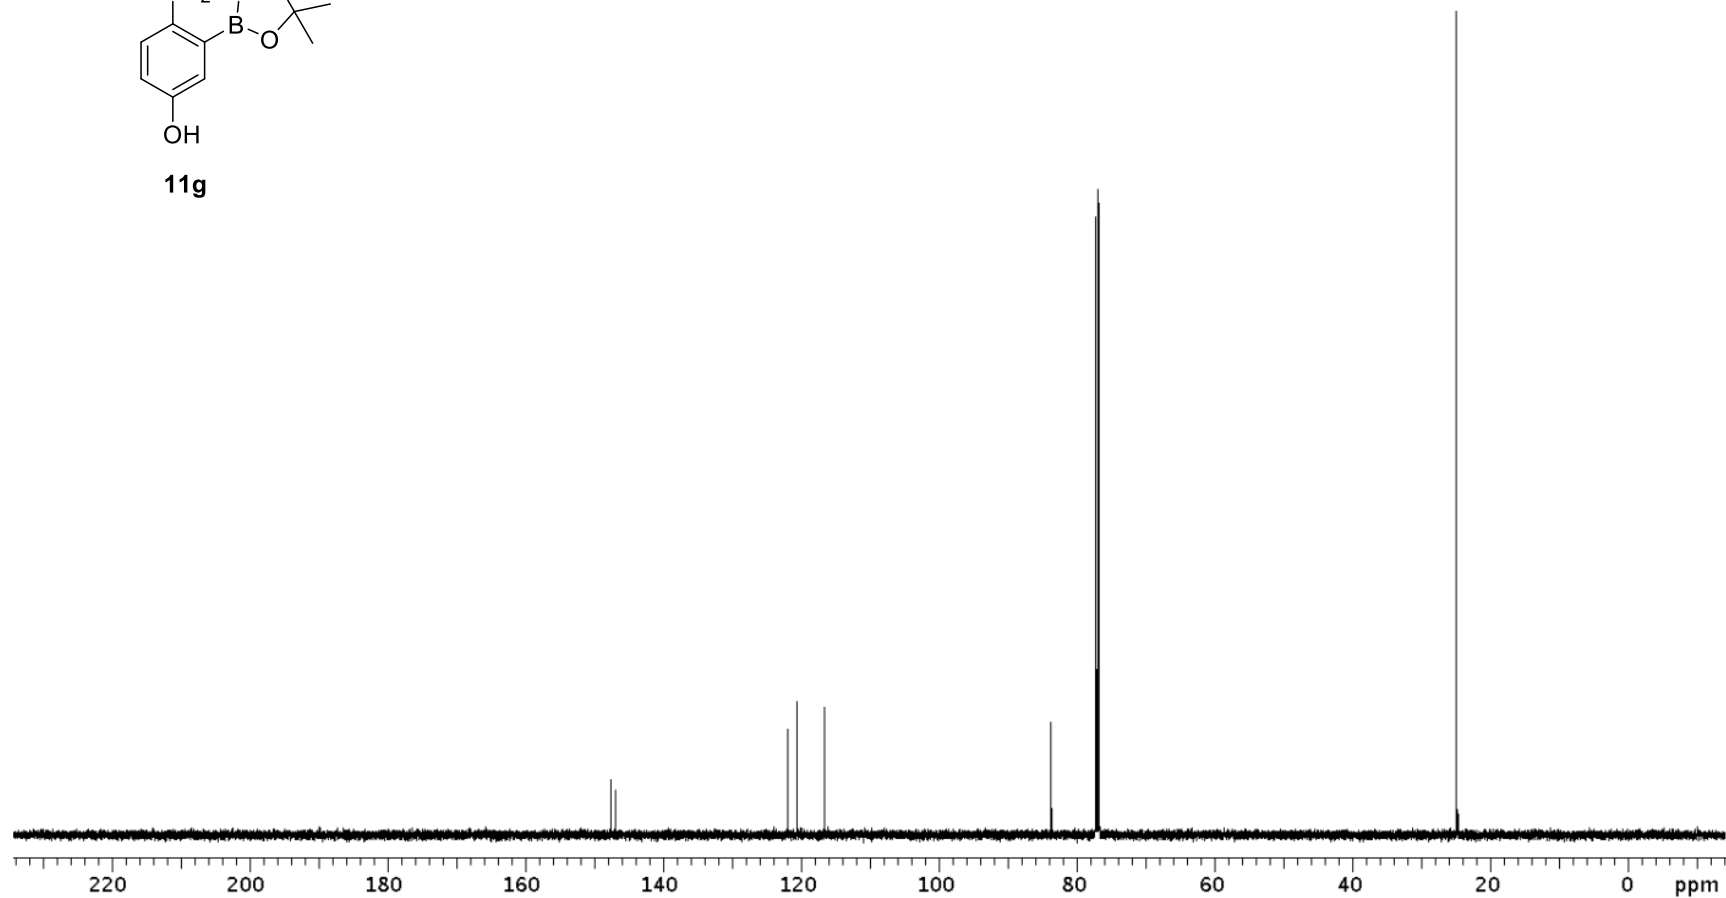

**<sup>1</sup>H NMR (500 MHz, C<sub>6</sub>D<sub>6</sub>) 4-methoxy-2-(4,4,5,5-tetramethyl-1,3,2-dioxaborolan-2-yl)-benzenamine**

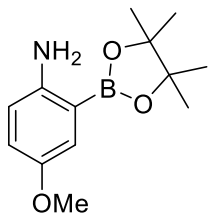

**11h**

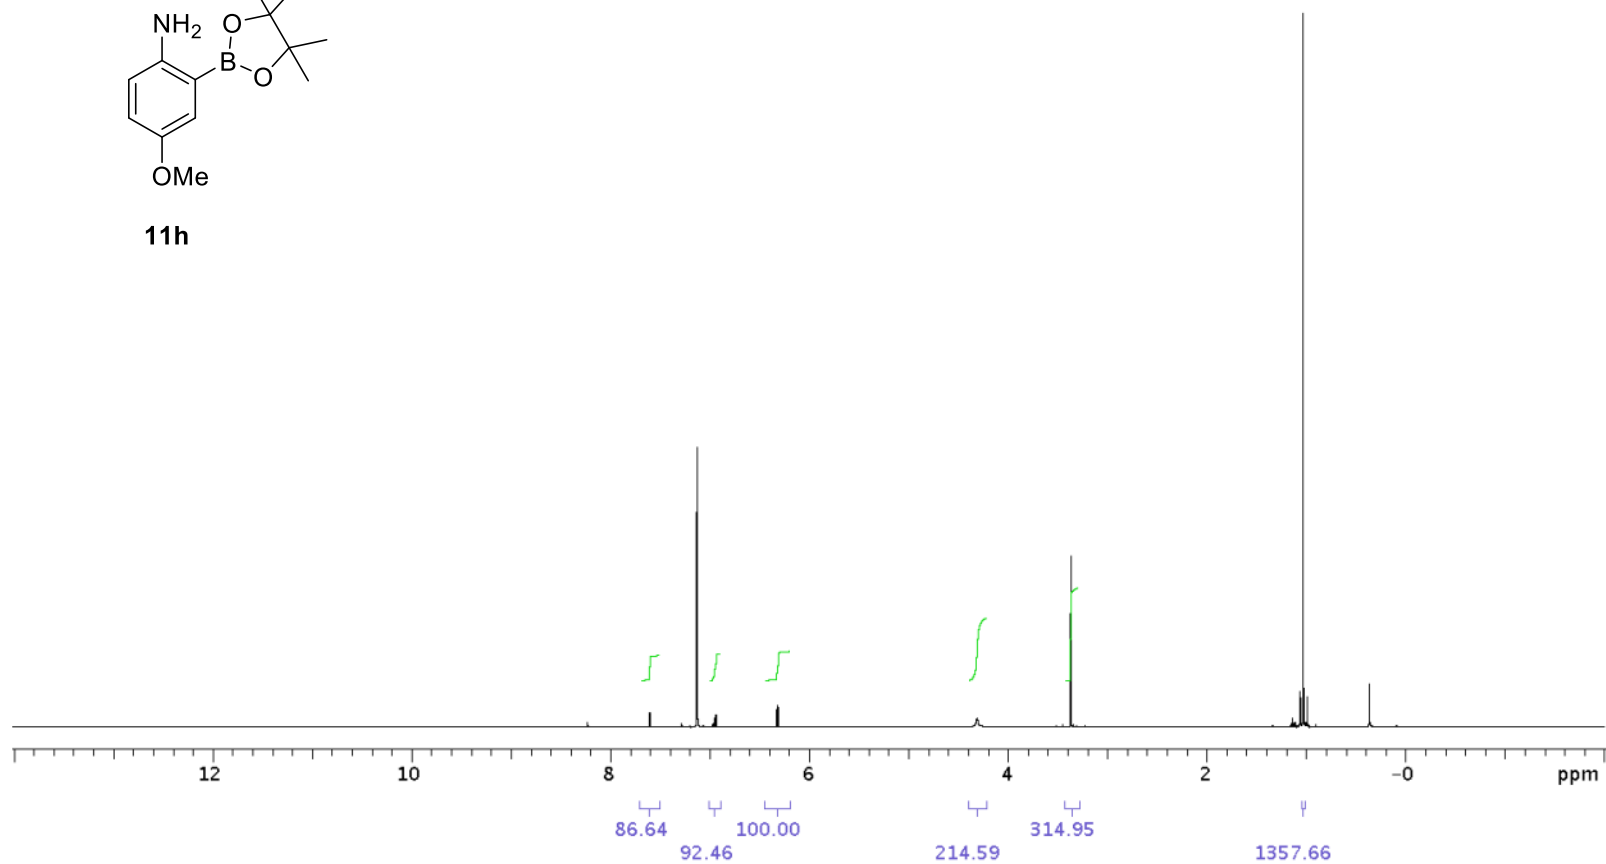

<sup>13</sup>C NMR (125 MHz, CDCl<sub>3</sub>) 4-methoxy-2-(4,4,5,5-tetramethyl-1,3,2-dioxaborolan-2-yl)-benzenamine

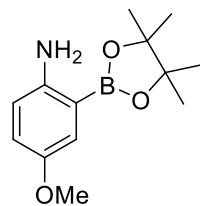

11h

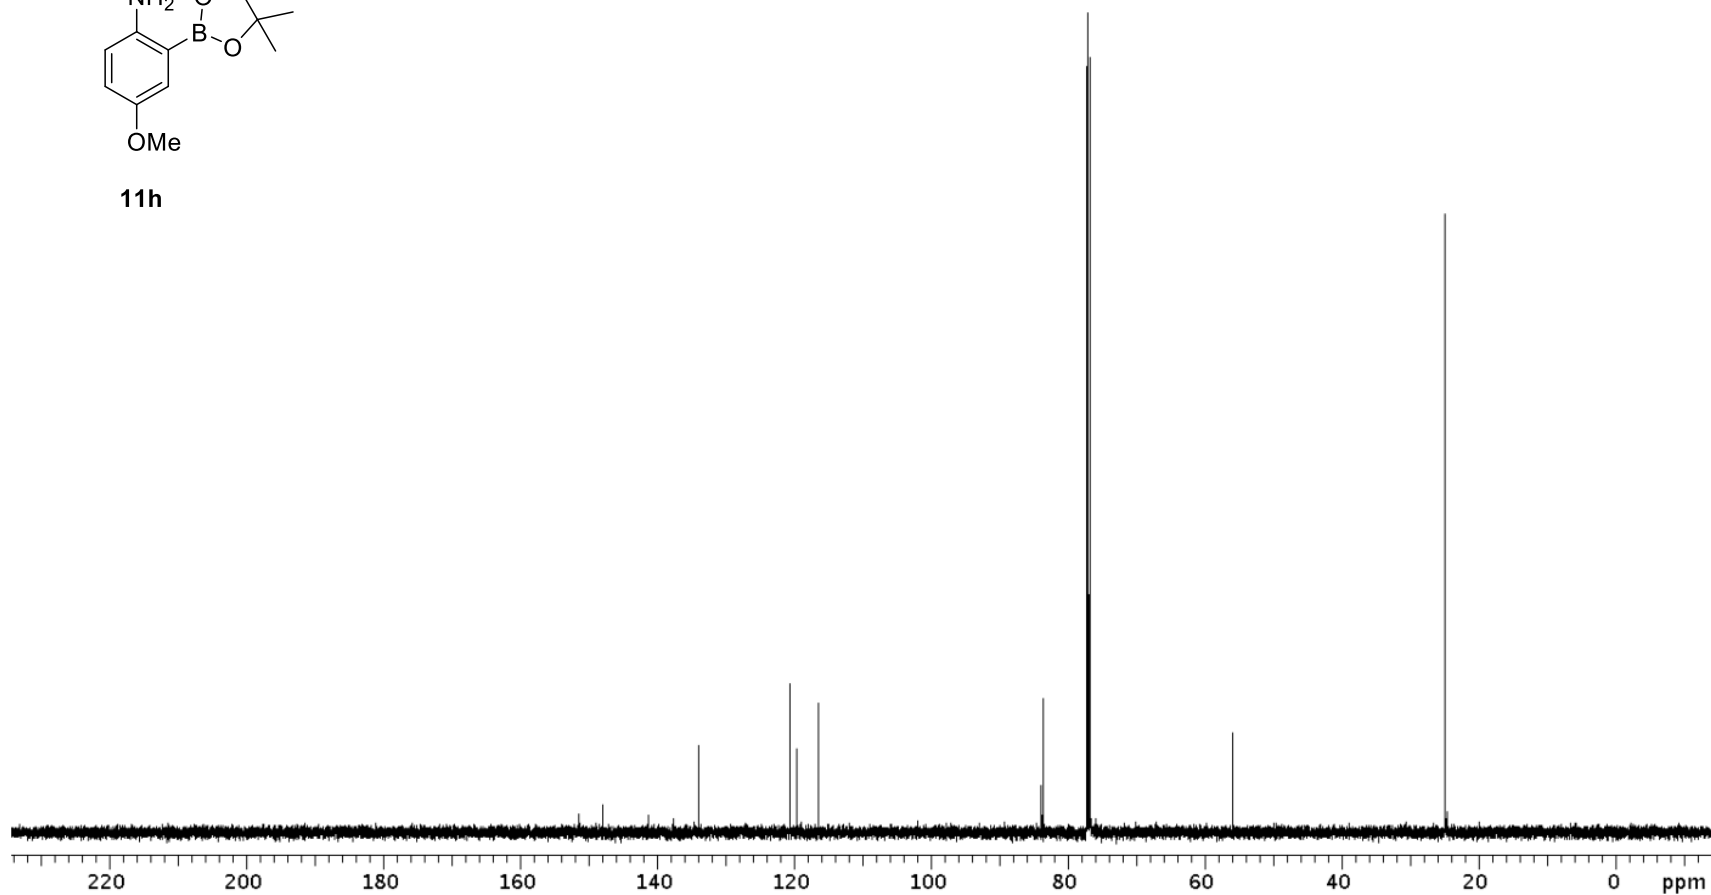

**<sup>1</sup>H NMR (500 MHz, CDCl<sub>3</sub>) 4-chloro-2-(4,4,5,5-tetramethyl-1,3,2-dioxaborolan-2-yl)-benzenamine**

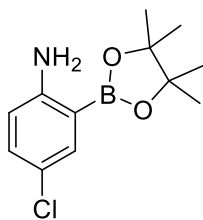

**11i**

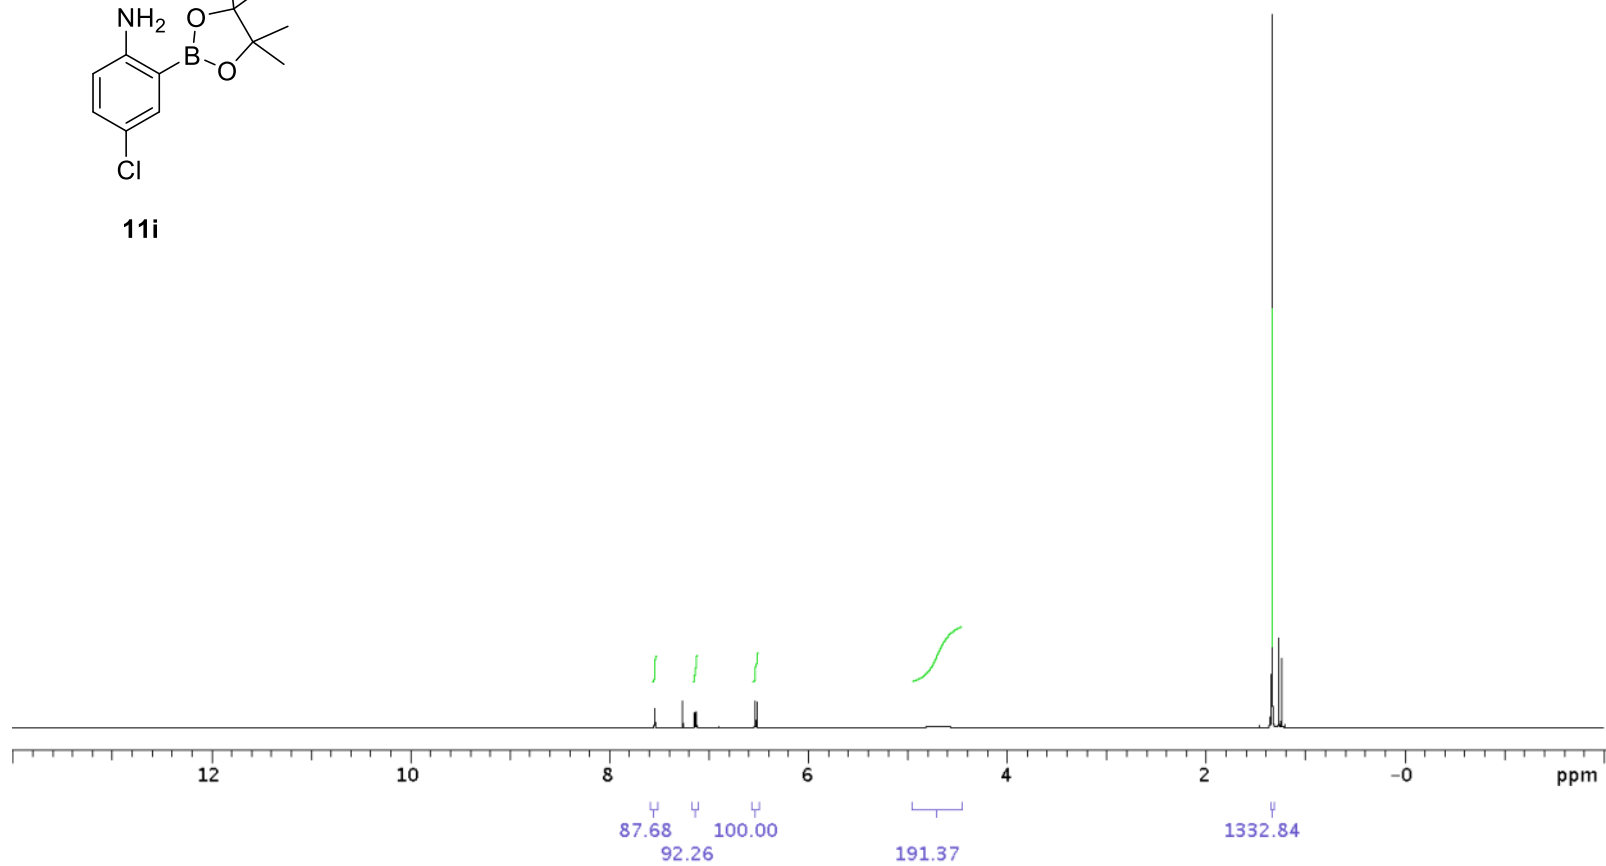

<sup>13</sup>C NMR (125 MHz, CDCl<sub>3</sub>) 4-chloro-2-(4,4,5,5-tetramethyl-1,3,2-dioxaborolan-2-yl)-benzenamine

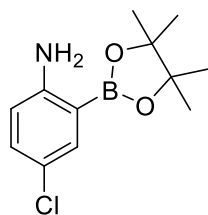

11i

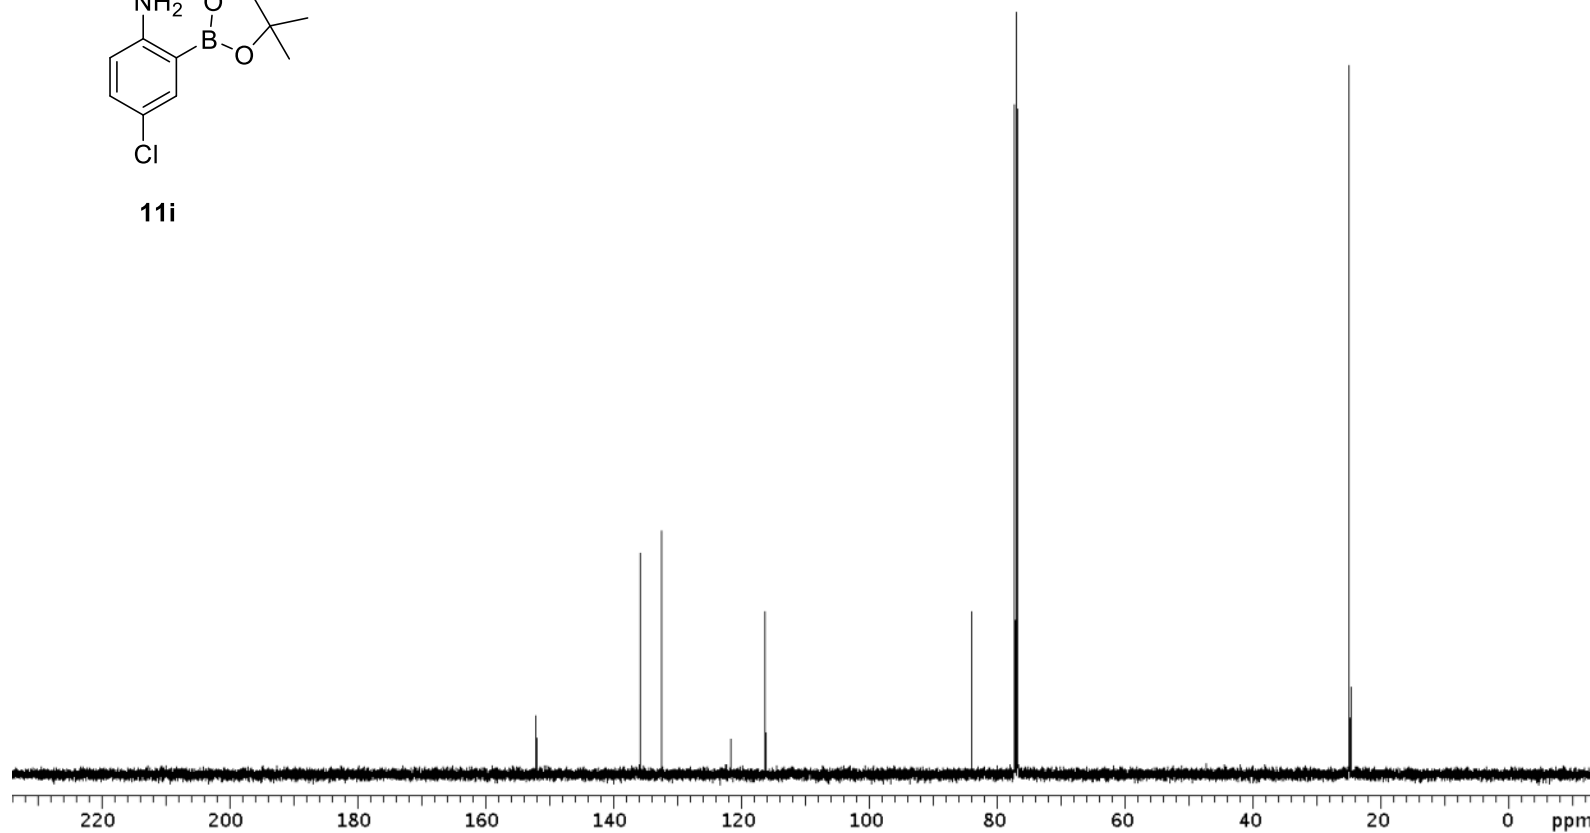

**<sup>1</sup>H NMR (500 MHz, CDCl<sub>3</sub>) 4-amino-2-chloro-5-(4,4,5,5-tetramethyl-1,3,2-dioxaborolan-2-yl)-benzonitrile**

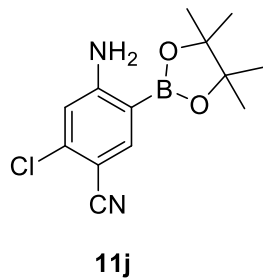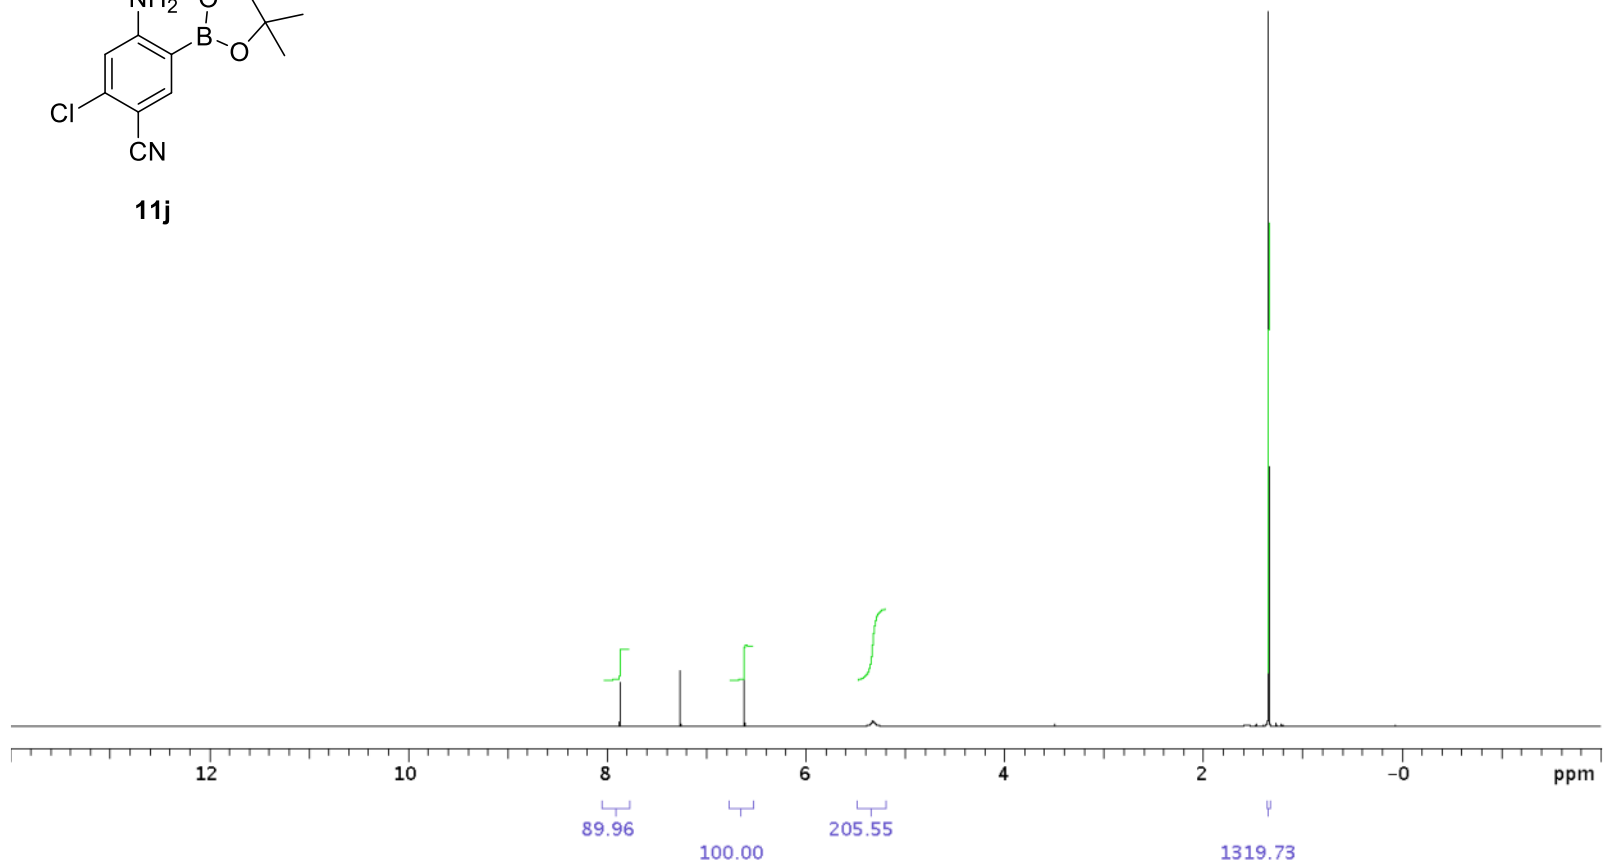



**$^{13}\text{C}$  NMR (125 MHz,  $\text{CDCl}_3$ ) 4-amino-2-chloro-5-(4,4,5,5-tetramethyl-1,3,2-dioxaborolan-2-yl)-benzonitrile**

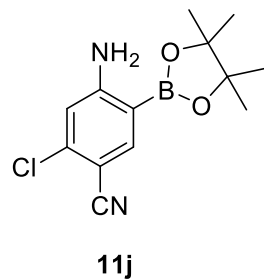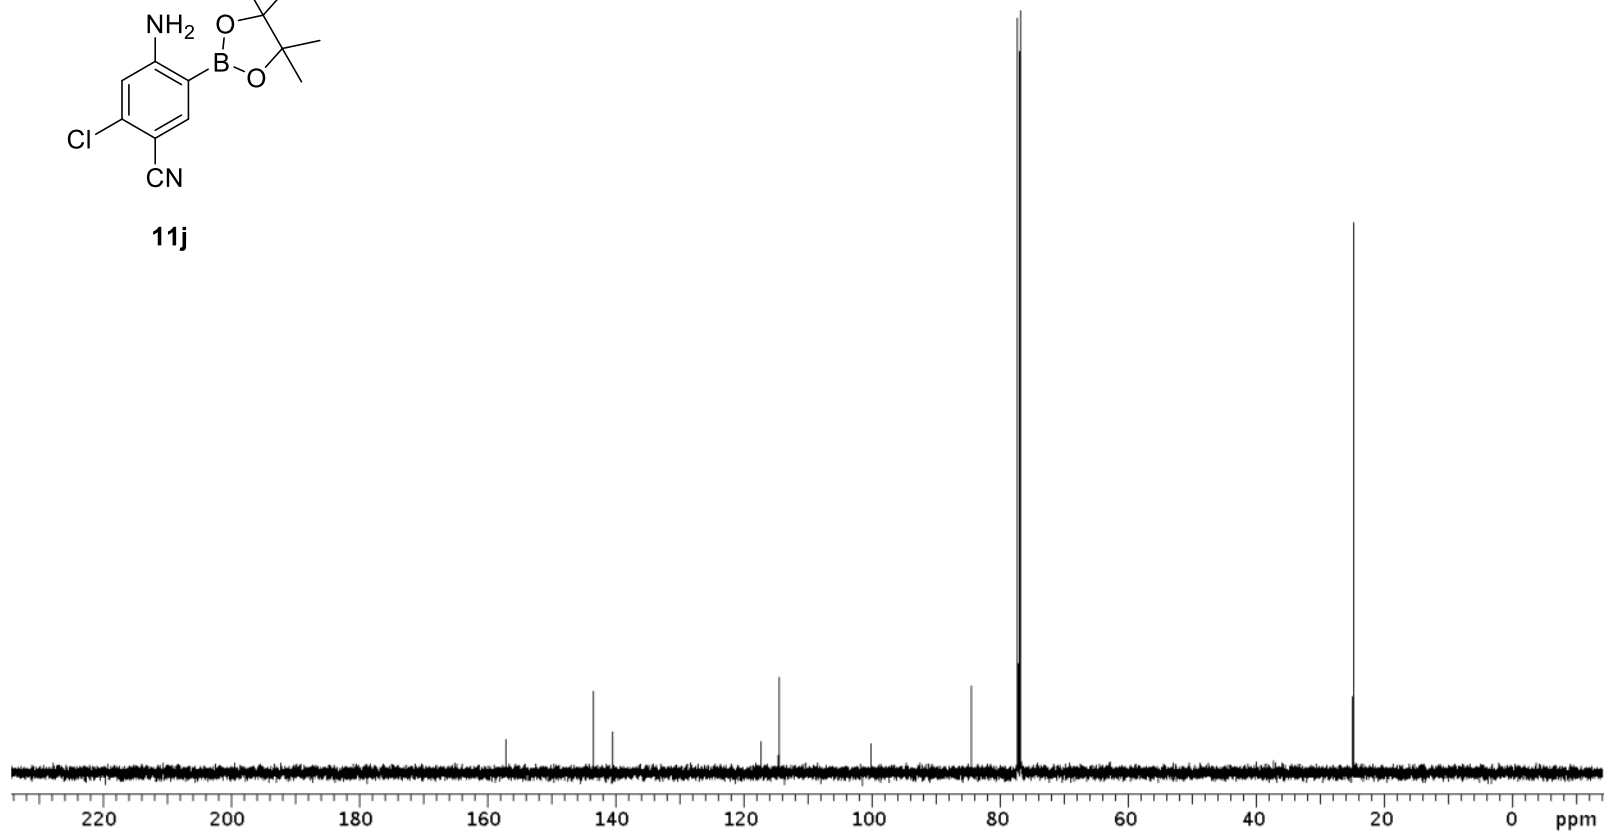

**<sup>1</sup>H NMR (500 MHz, CDCl<sub>3</sub>) 5-chloro-4-methoxy-2-(4,4,5,5-tetramethyl-1,3,2-dioxaborolan-2-yl)-benzamine**

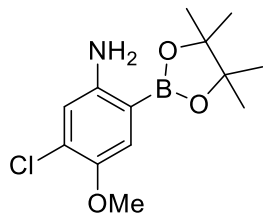

**11k**

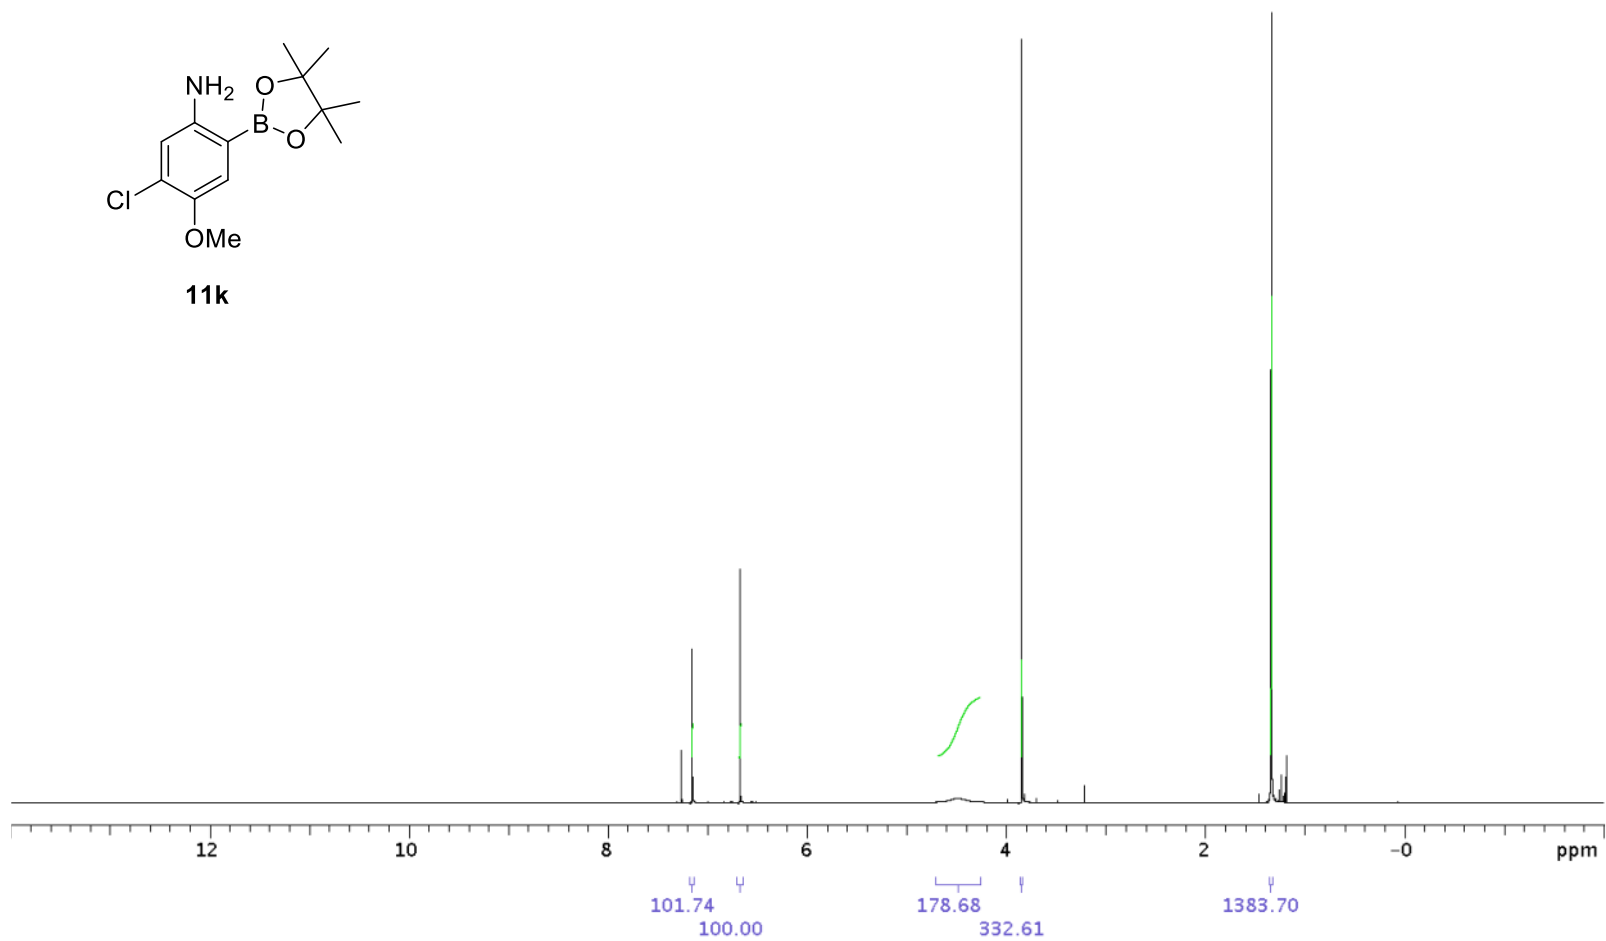

<sup>13</sup>C NMR (125 MHz, CDCl<sub>3</sub>) 5-chloro-4-methoxy-2-(4,4,5,5-tetramethyl-1,3,2-dioxaborolan-2-yl)-benzamine

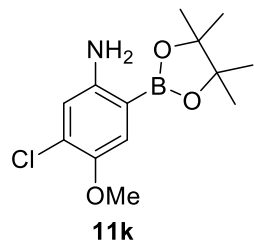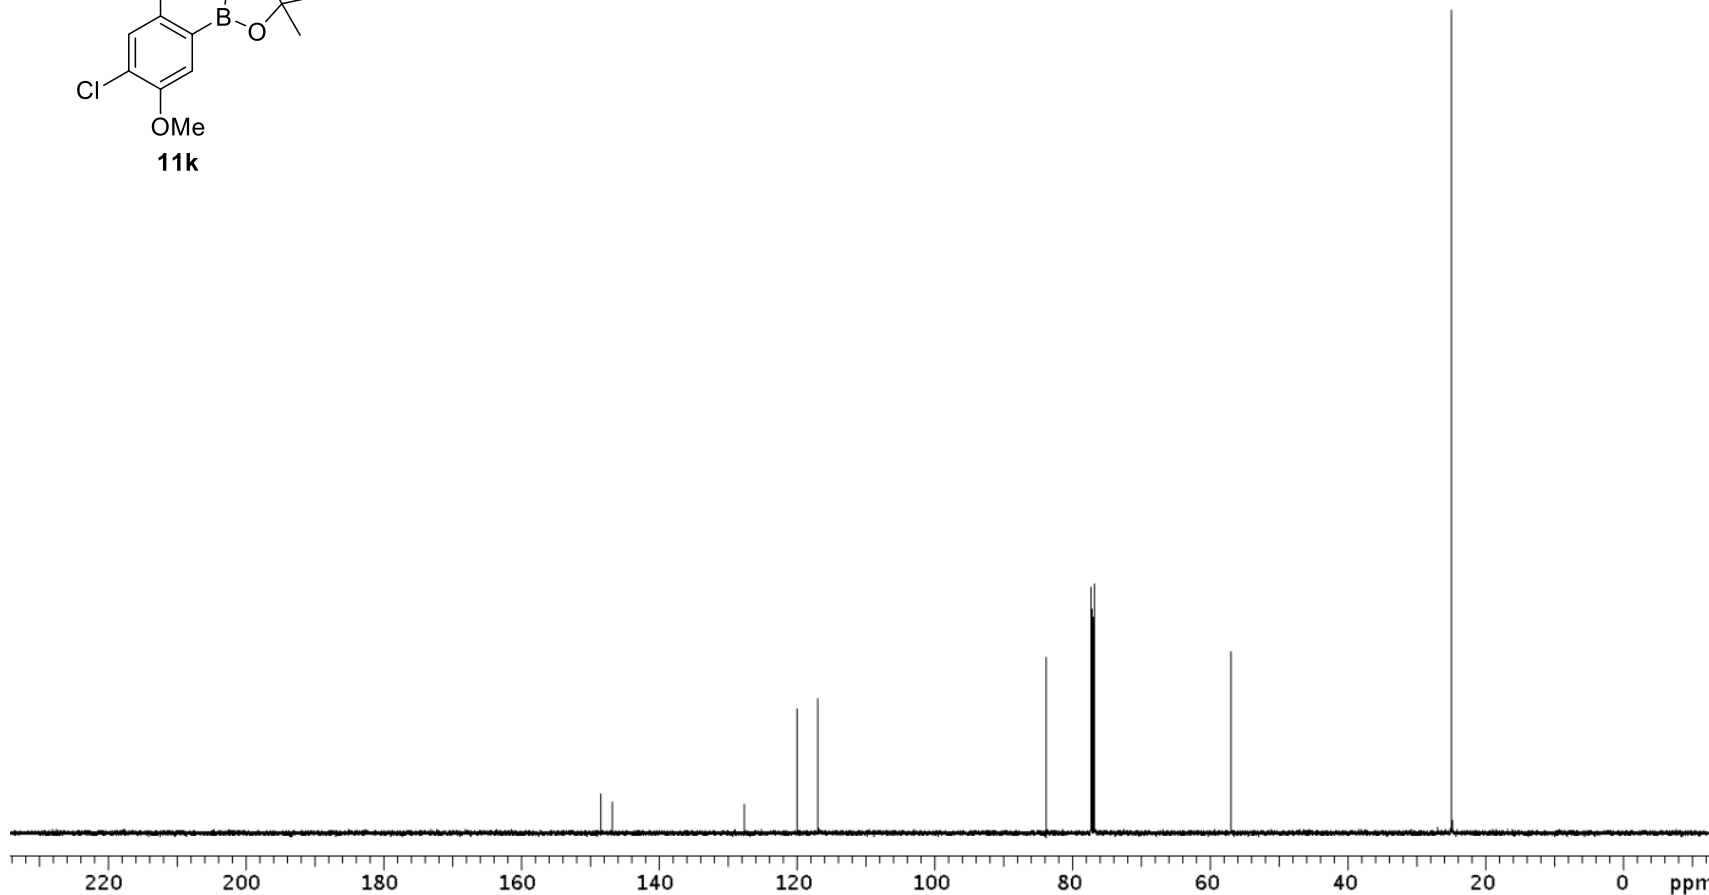

**<sup>1</sup>H NMR (500 MHz, CD<sub>2</sub>Cl<sub>2</sub>) 4-fluoro-2-(4,4,5,5-tetramethyl-1,3,2-dioxaborolan-2-yl)-benzamine**

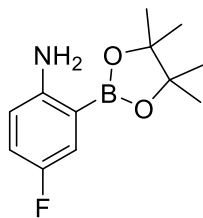

**111**

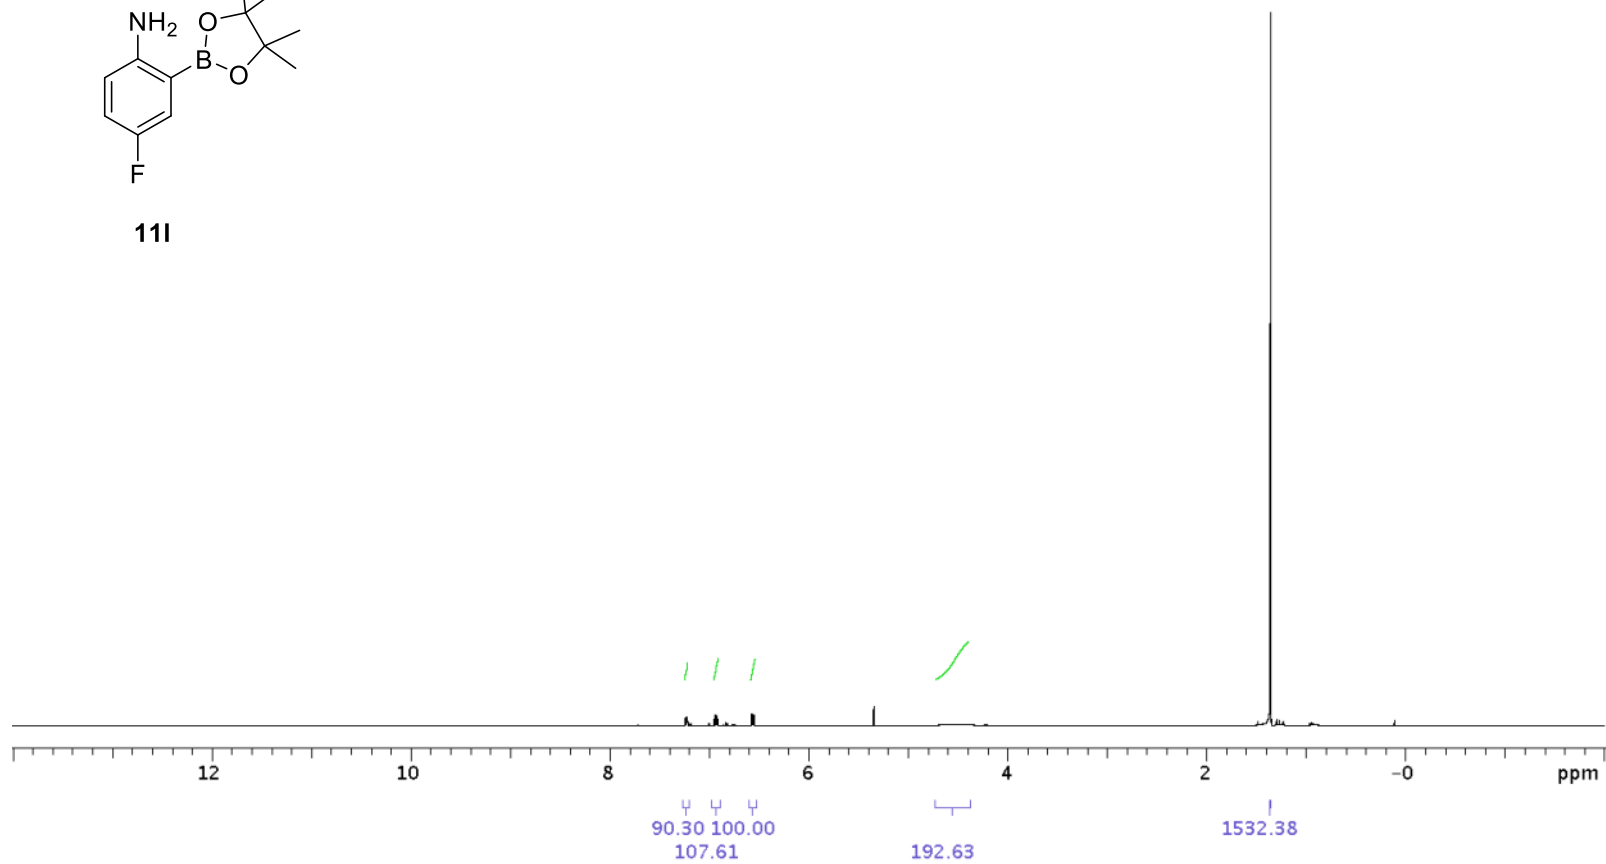

<sup>13</sup>C NMR (125 MHz, CD<sub>2</sub>Cl<sub>2</sub>) 4-fluoro-2-(4,4,5,5-tetramethyl-1,3,2-dioxaborolan-2-yl)-benzamine

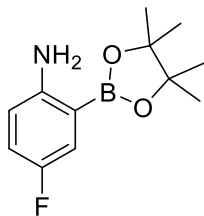

111

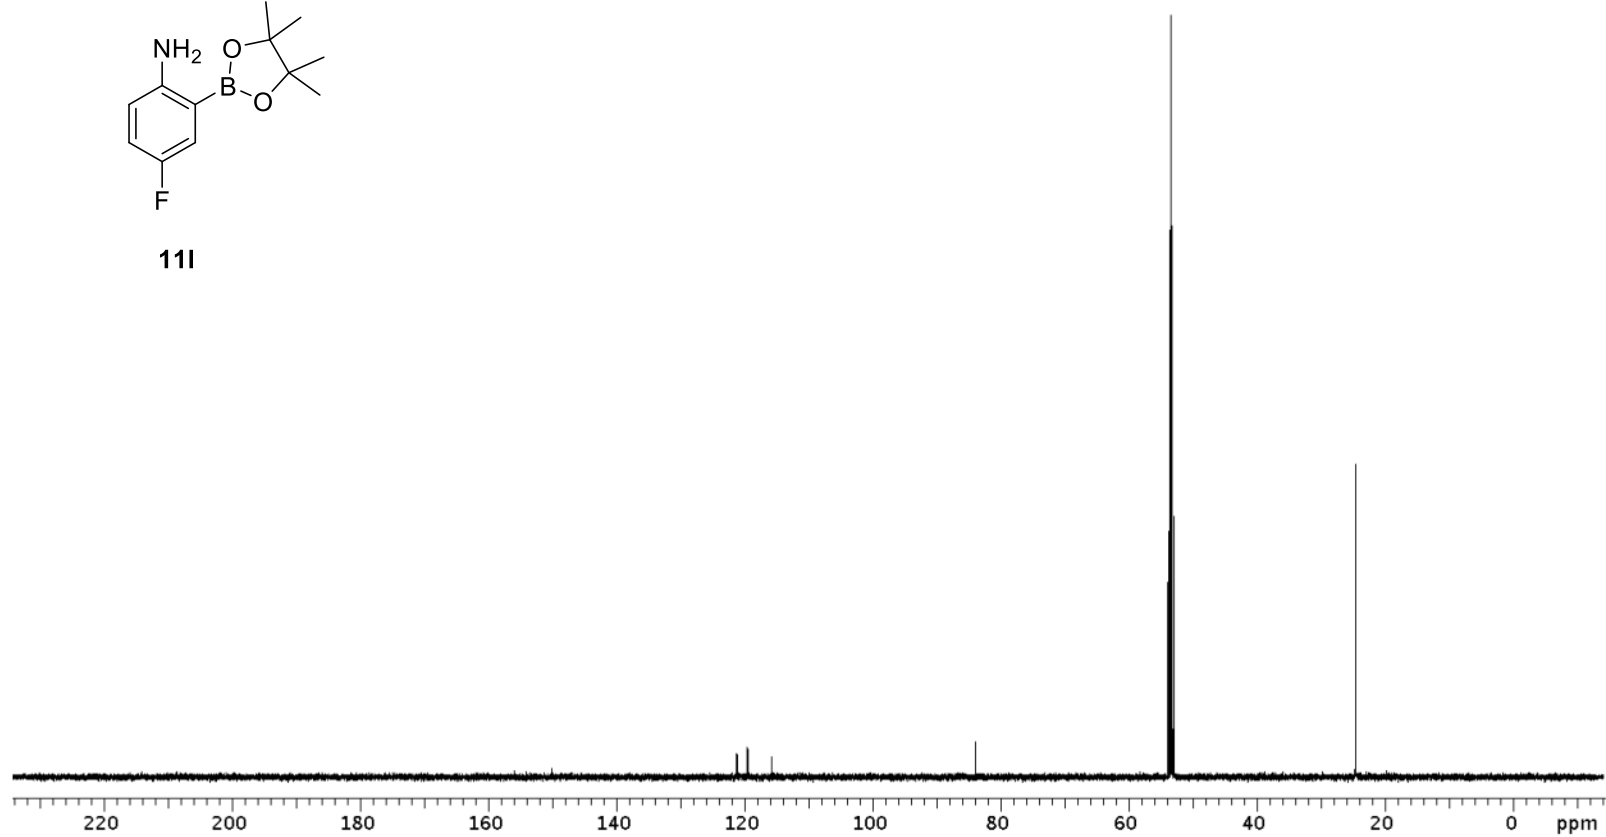

**<sup>1</sup>H NMR (500 MHz, CDCl<sub>3</sub>) 4-amino-2,5-bis(4,4,5,5-tetramethyl-1,3,2-dioxaborolan-2-yl)-benzonitrile**

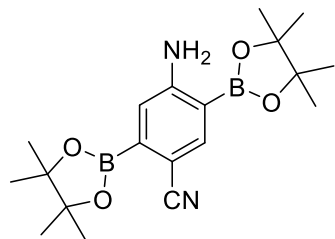

**11m**

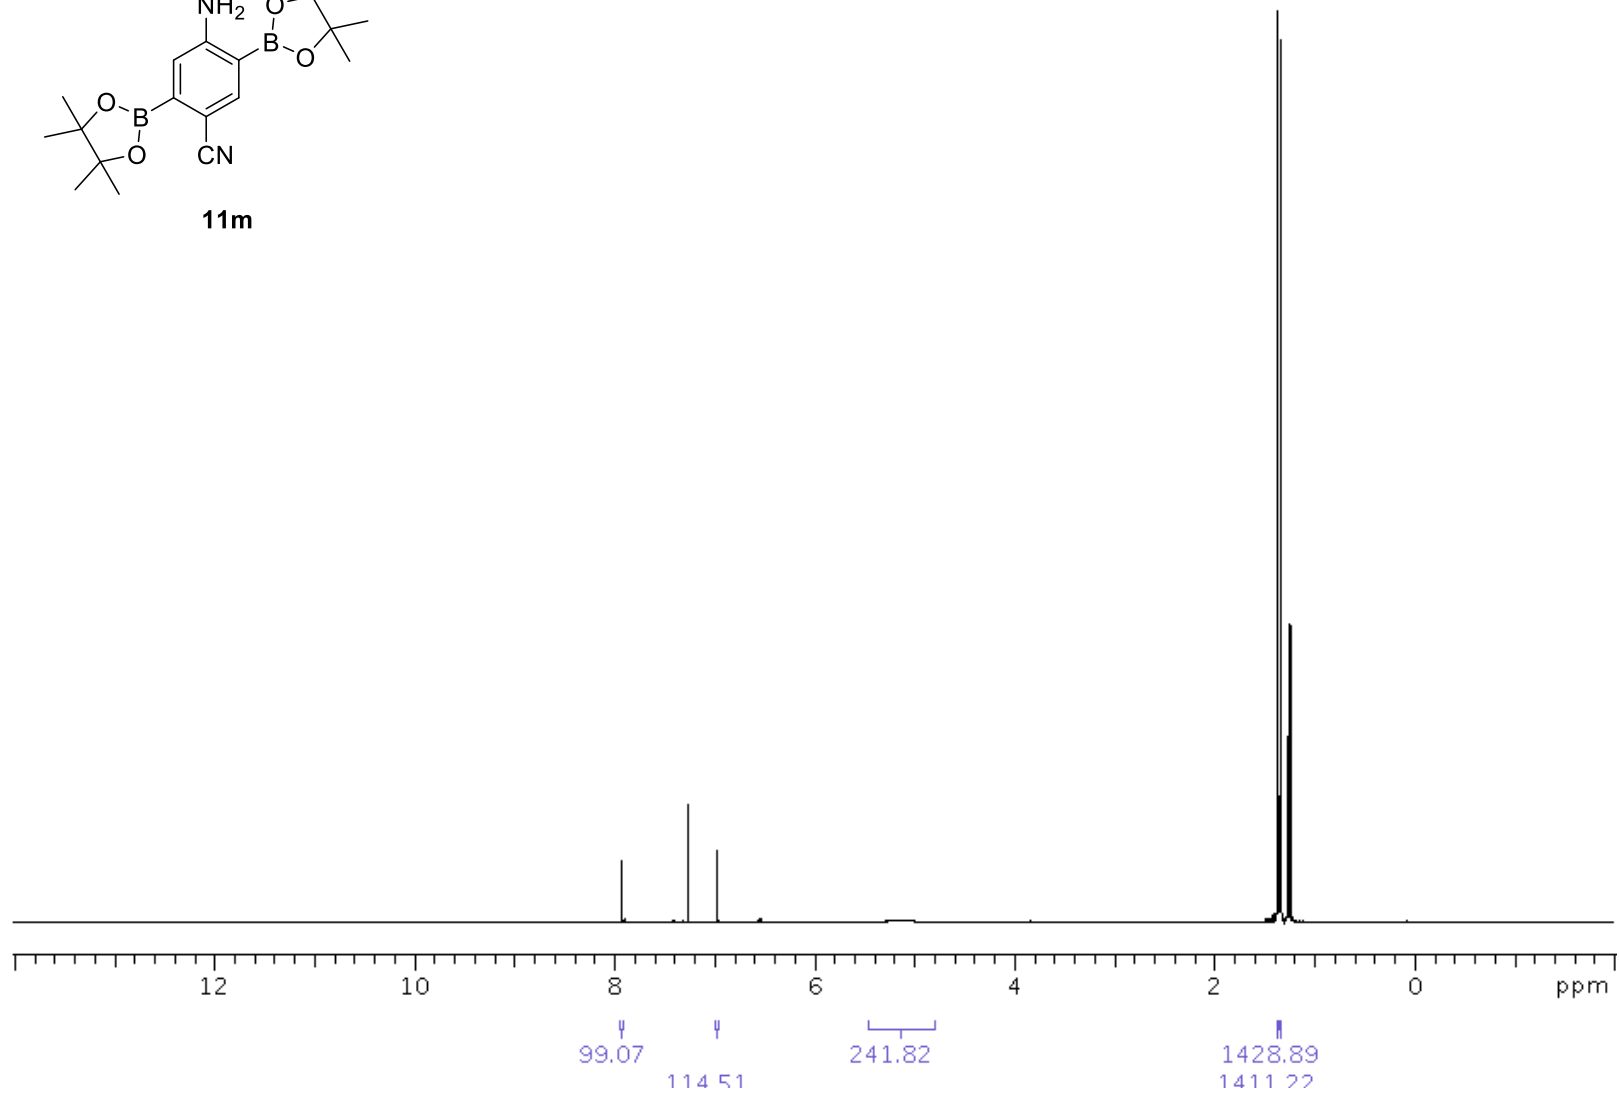

<sup>13</sup>C NMR (125 MHz, CDCl<sub>3</sub>) 4-amino-2,5-bis(4,4,5,5-tetramethyl-1,3,2-dioxaborolan-2-yl)-benzonitrile

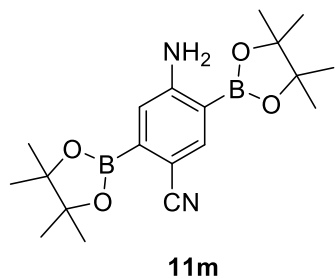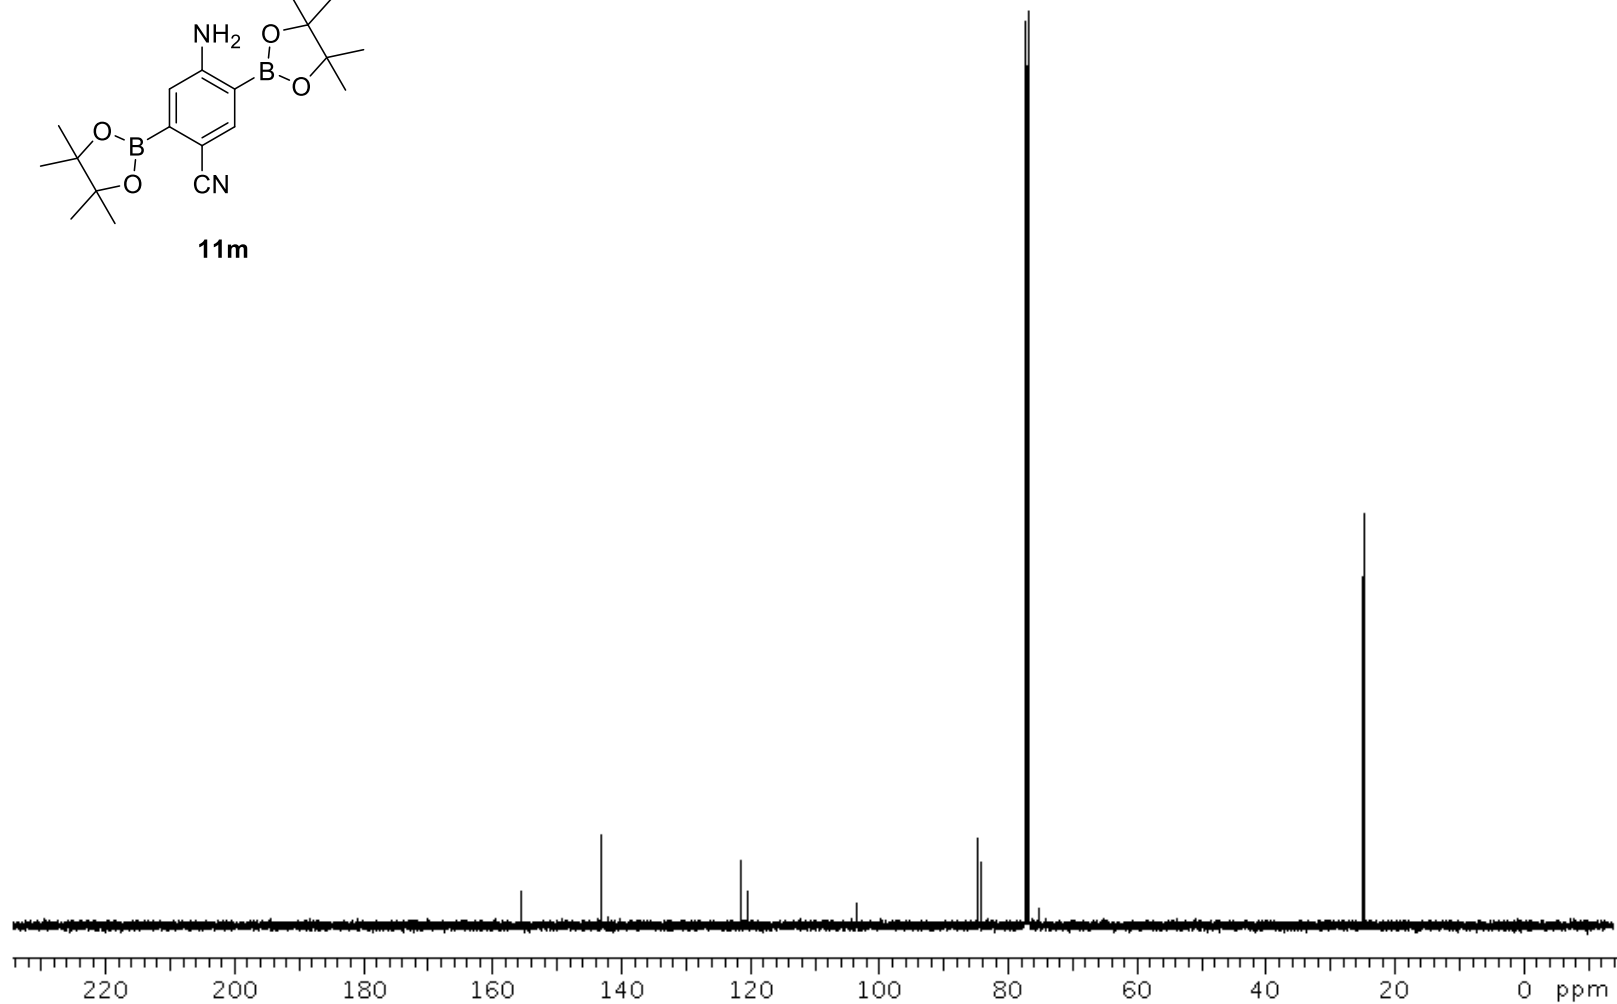

<sup>1</sup>H NMR (500 MHz, CDCl<sub>3</sub>) 5-methoxy-2-(4,4,5-trimethyl-1,3,2-dioxaborolan-2-yl)aniline

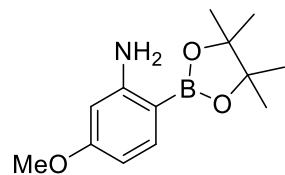

11n

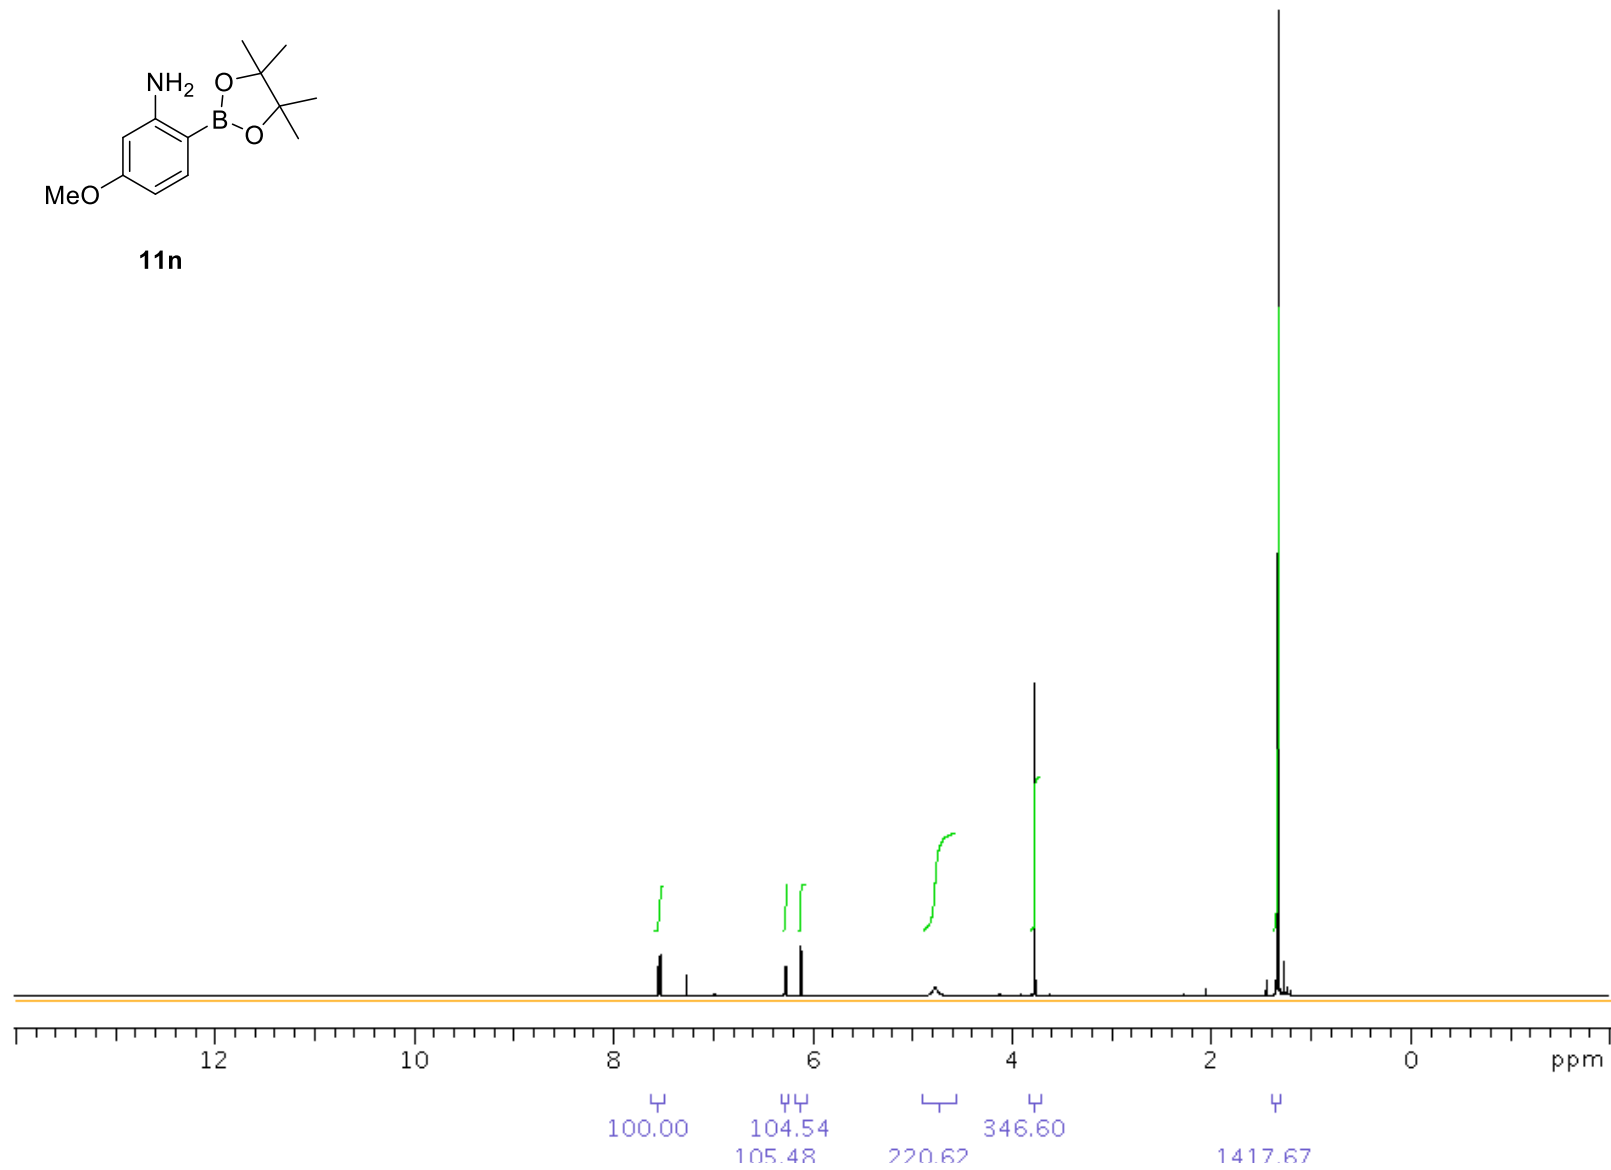



<sup>13</sup>C NMR (125 MHz, CDCl<sub>3</sub>) 5-methoxy-2-(4,4,5-trimethyl-1,3,2-dioxaborolan-2-yl)aniline

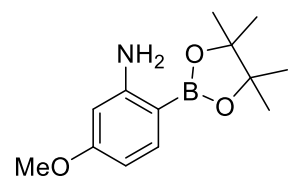

**11n**

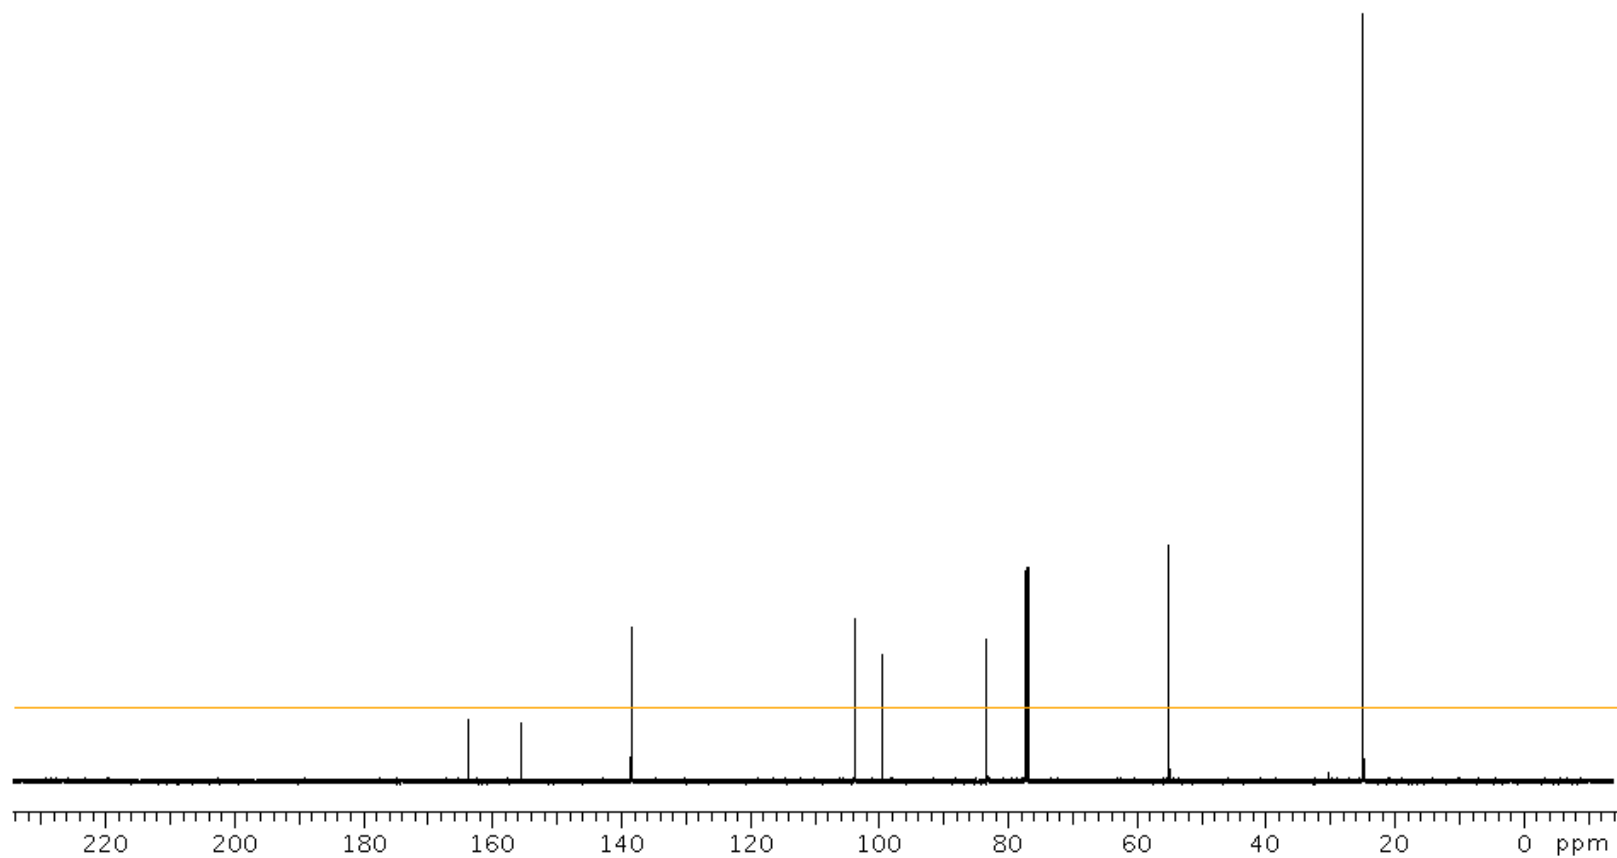

**<sup>1</sup>H NMR (500 MHz, CD<sub>3</sub>CN) 3-methoxy-5-(4,4,5,5-tetramethyl-1,3,2-dioxaborolan-2-yl)aniline**

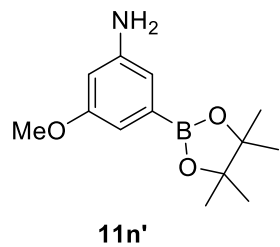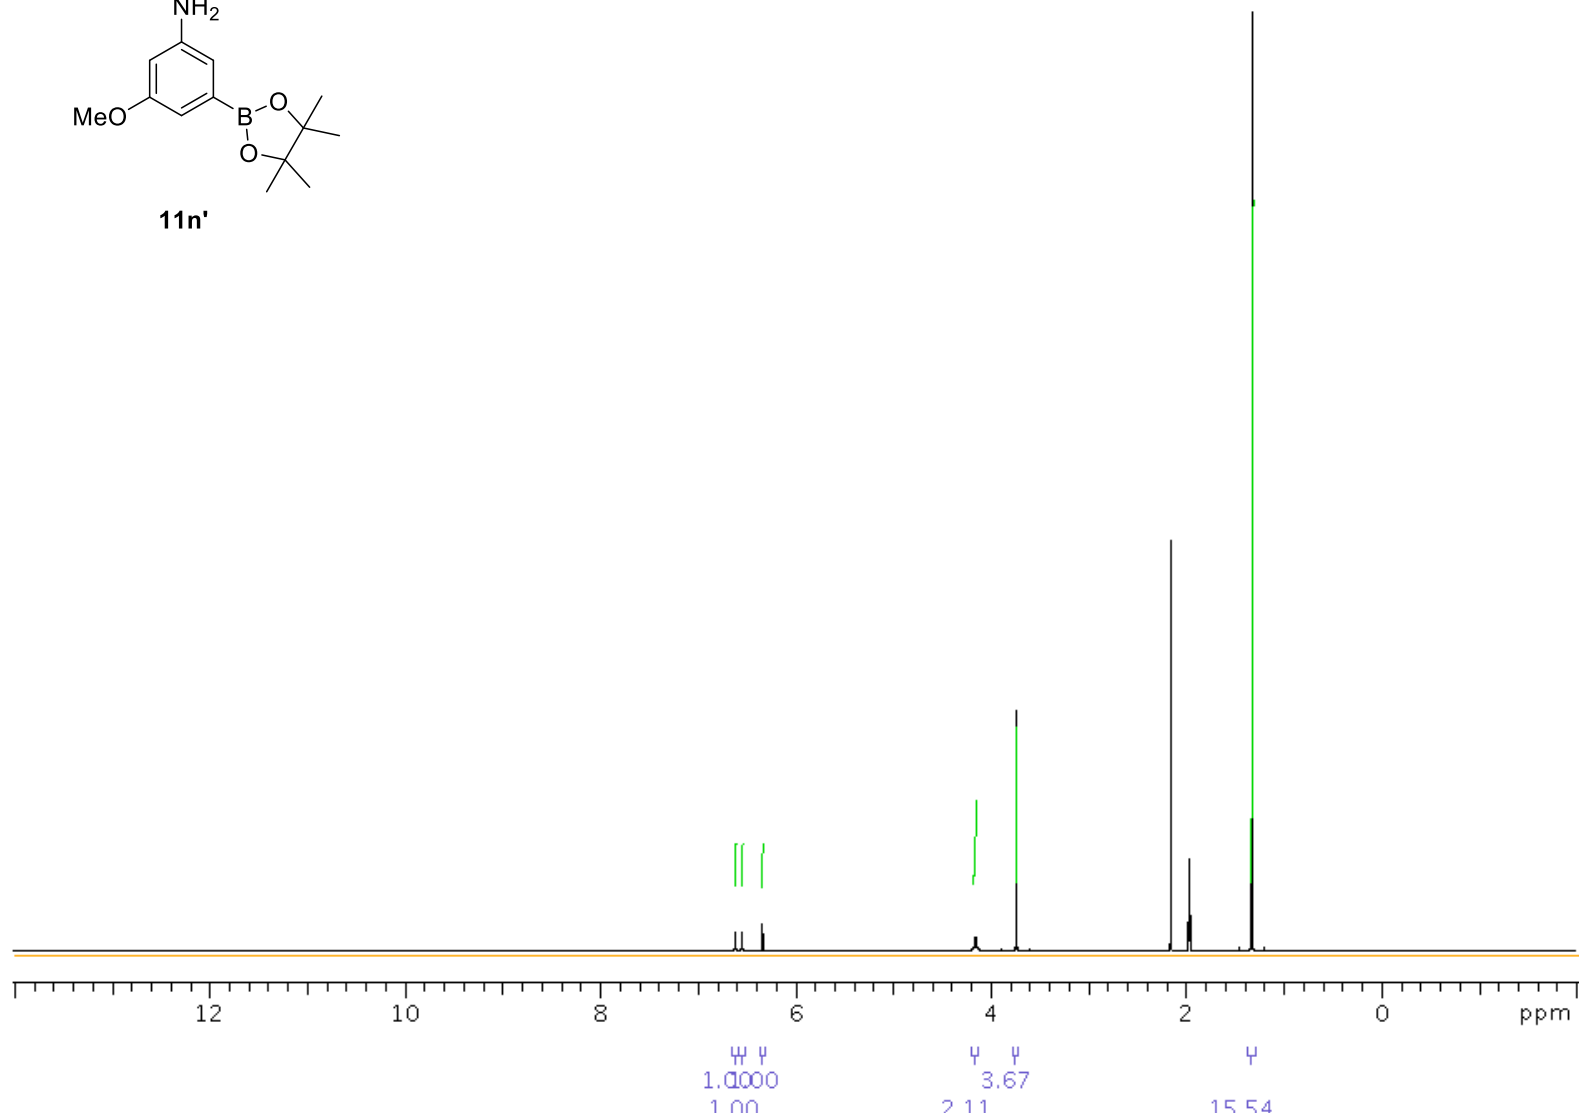

<sup>13</sup>C NMR (125 MHz, CD<sub>3</sub>CN) 3-methoxy-5-(4,4,5,5-tetramethyl-1,3,2-dioxaborolan-2-yl)aniline

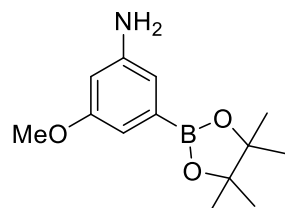

11n'

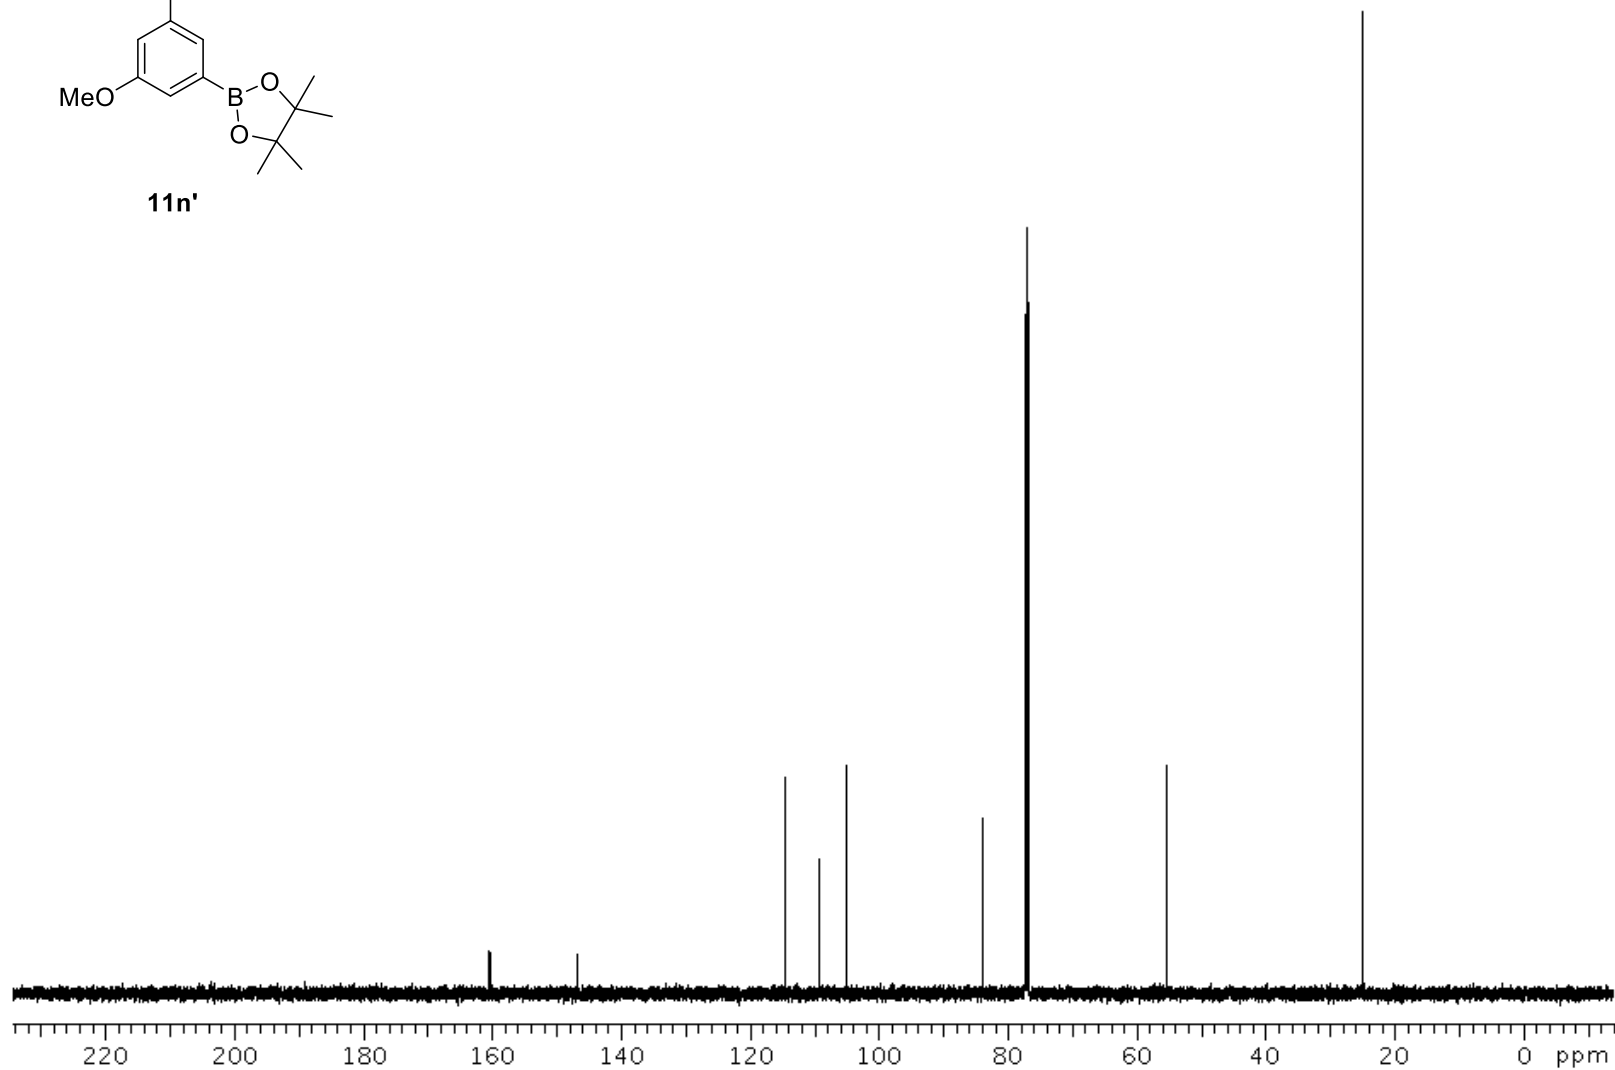

**<sup>1</sup>H NMR (500 MHz, CDCl<sub>3</sub>) 2-(4,4,5,5-tetramethyl-1,3,2-dioxaborolan-2-yl)-5-(trifluoromethyl)-benzenamine**

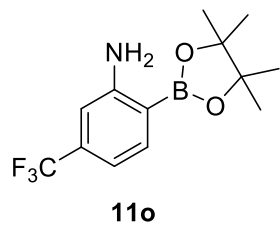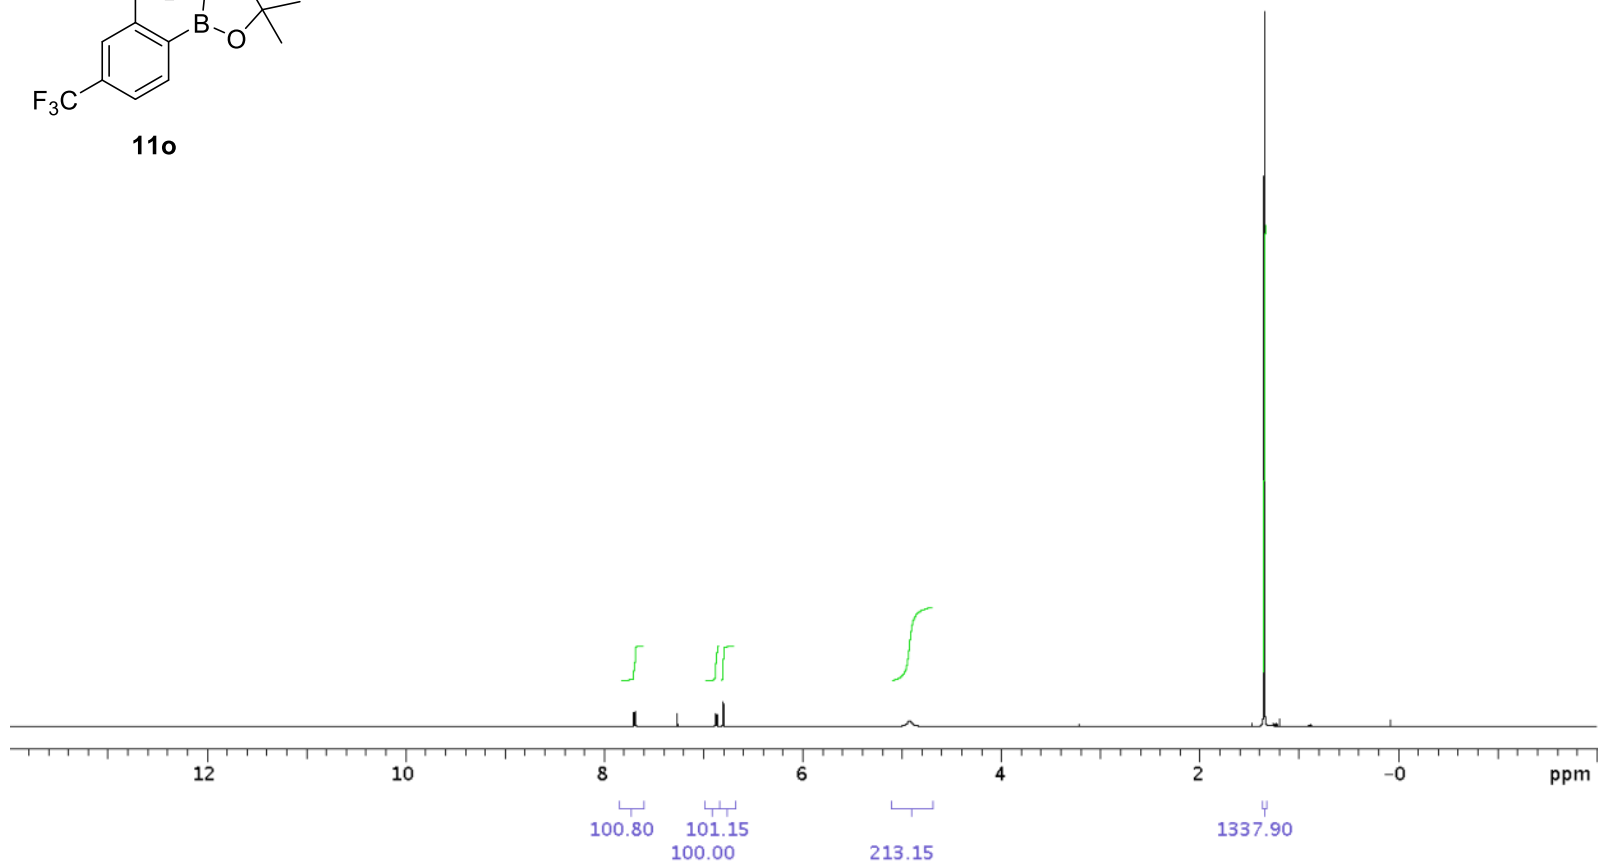

<sup>13</sup>C NMR (125 MHz, CDCl<sub>3</sub>) 2-(4,4,5,5-tetramethyl-1,3,2-dioxaborolan-2-yl)-5-(trifluoromethyl)-benzenamine

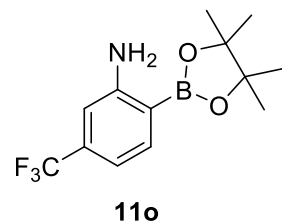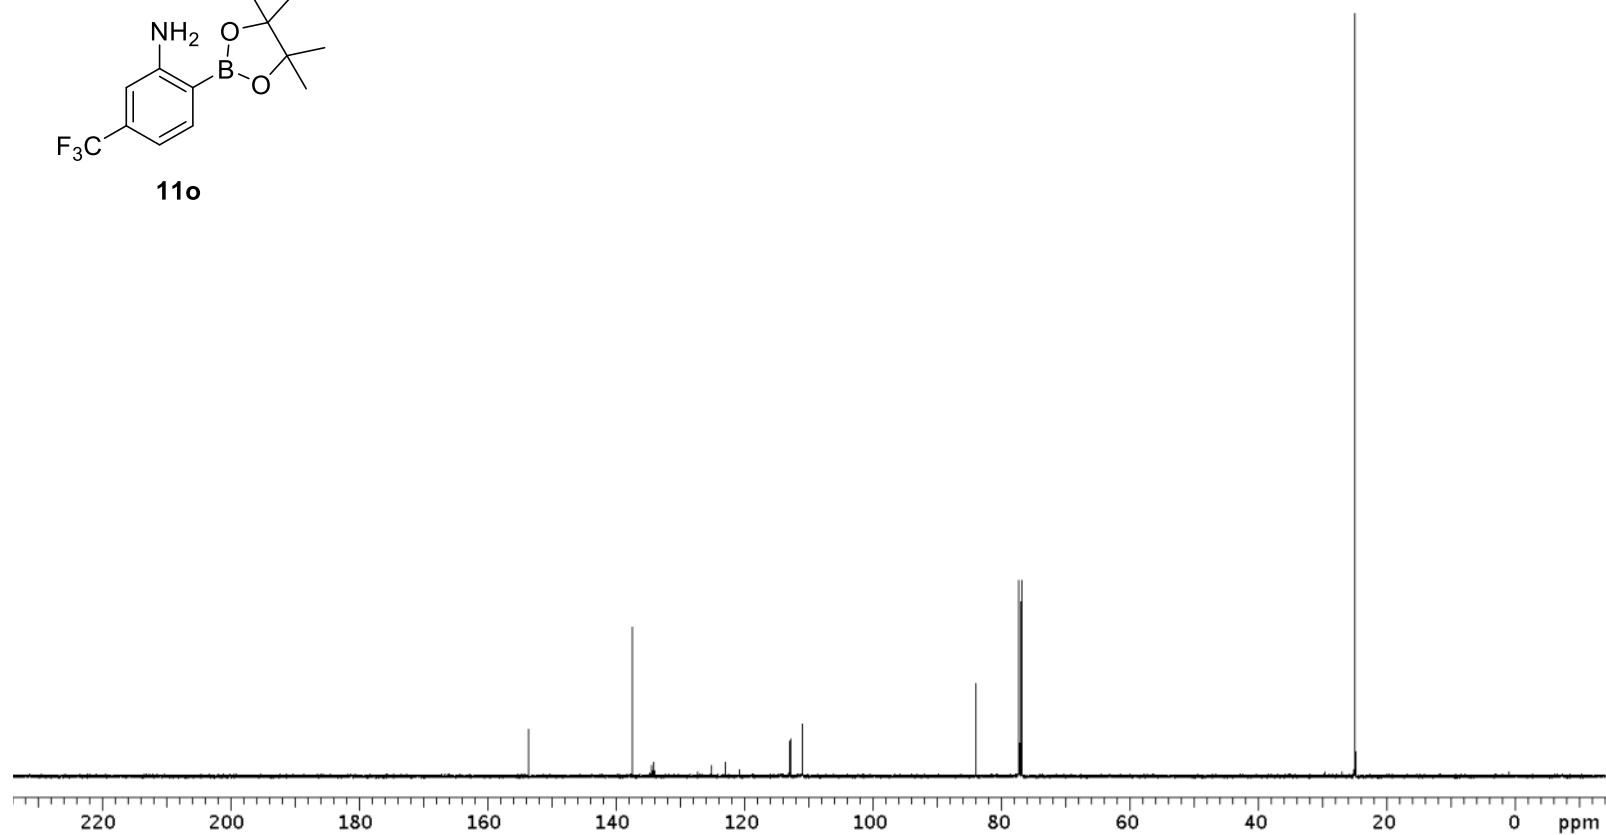

**<sup>1</sup>H NMR (500 MHz, CDCl<sub>3</sub>) 3-(4,4,5,5-tetramethyl-1,3,2-dioxaborolan-2-yl)-5-(trifluoromethyl)-benzenamine**

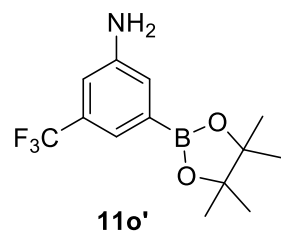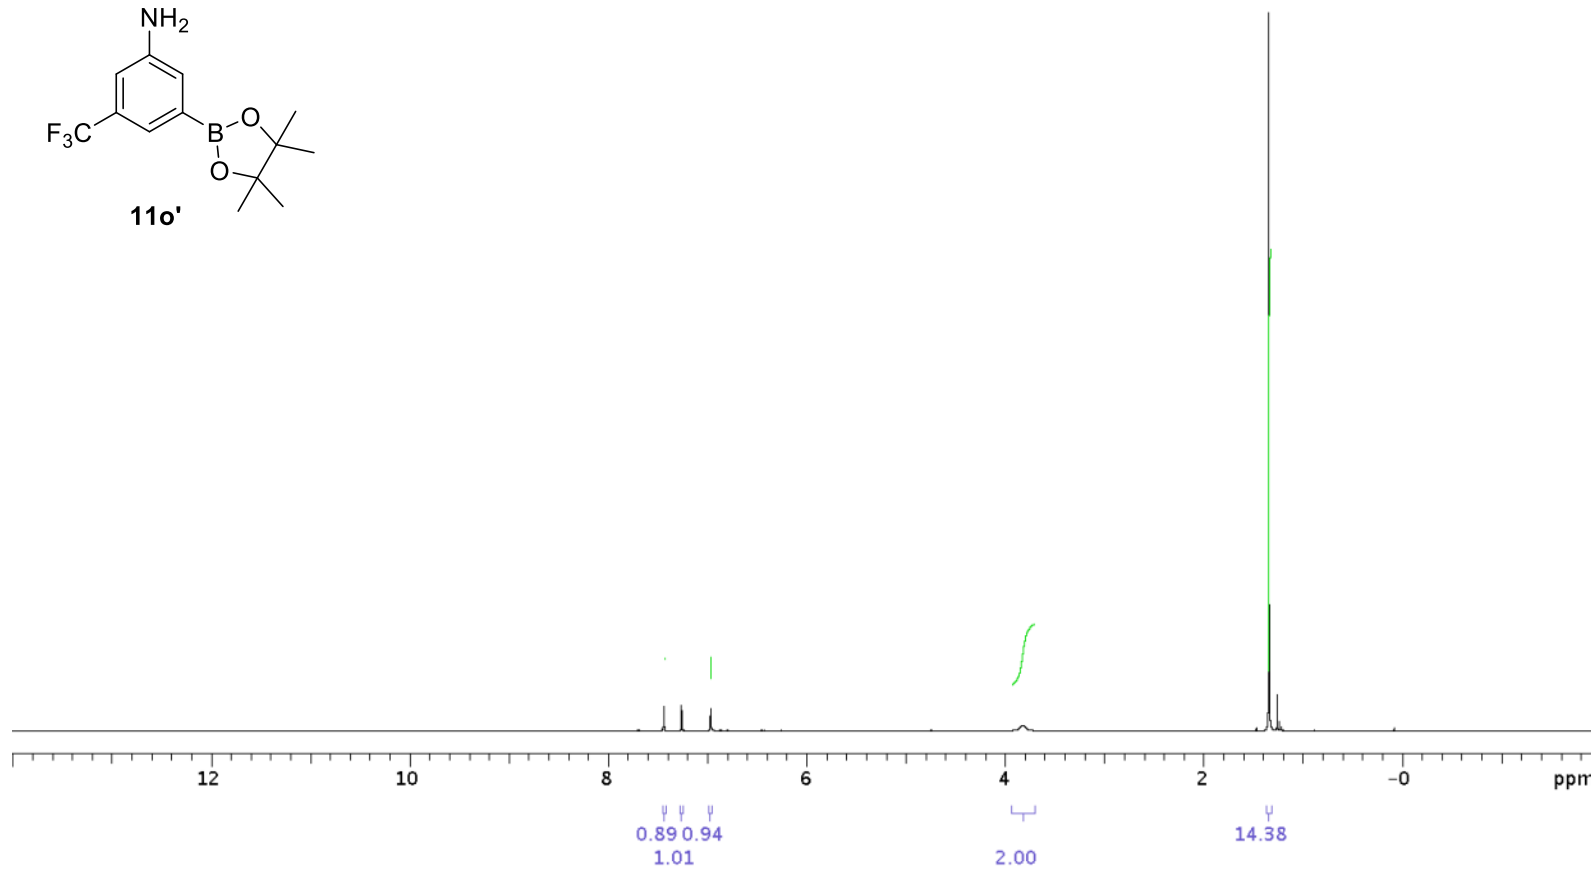

<sup>13</sup>C NMR (125 MHz, CDCl<sub>3</sub>) 3-(4,4,5,5-tetramethyl-1,3,2-dioxaborolan-2-yl)-5-(trifluoromethyl)-benzenamine

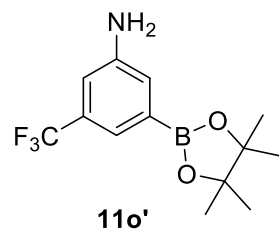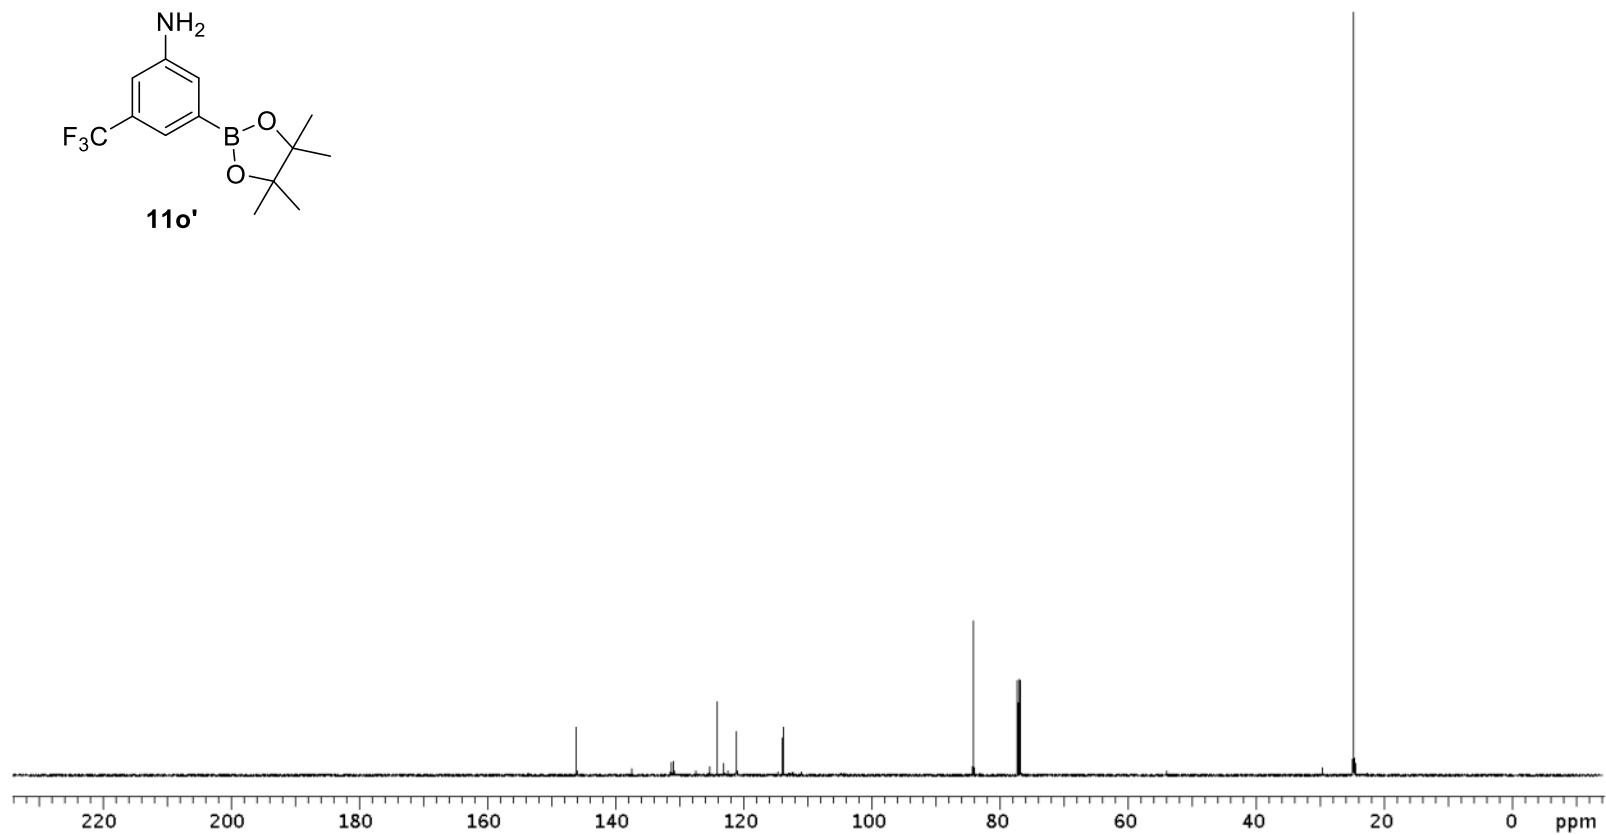

**<sup>1</sup>H NMR (500 MHz, CDCl<sub>3</sub>) 5-chloro-2-(4,4,5,5-tetramethyl-1,3,2-dioxaborolan-2-yl)-benzenamine**

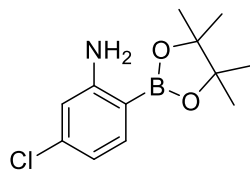

**11p**

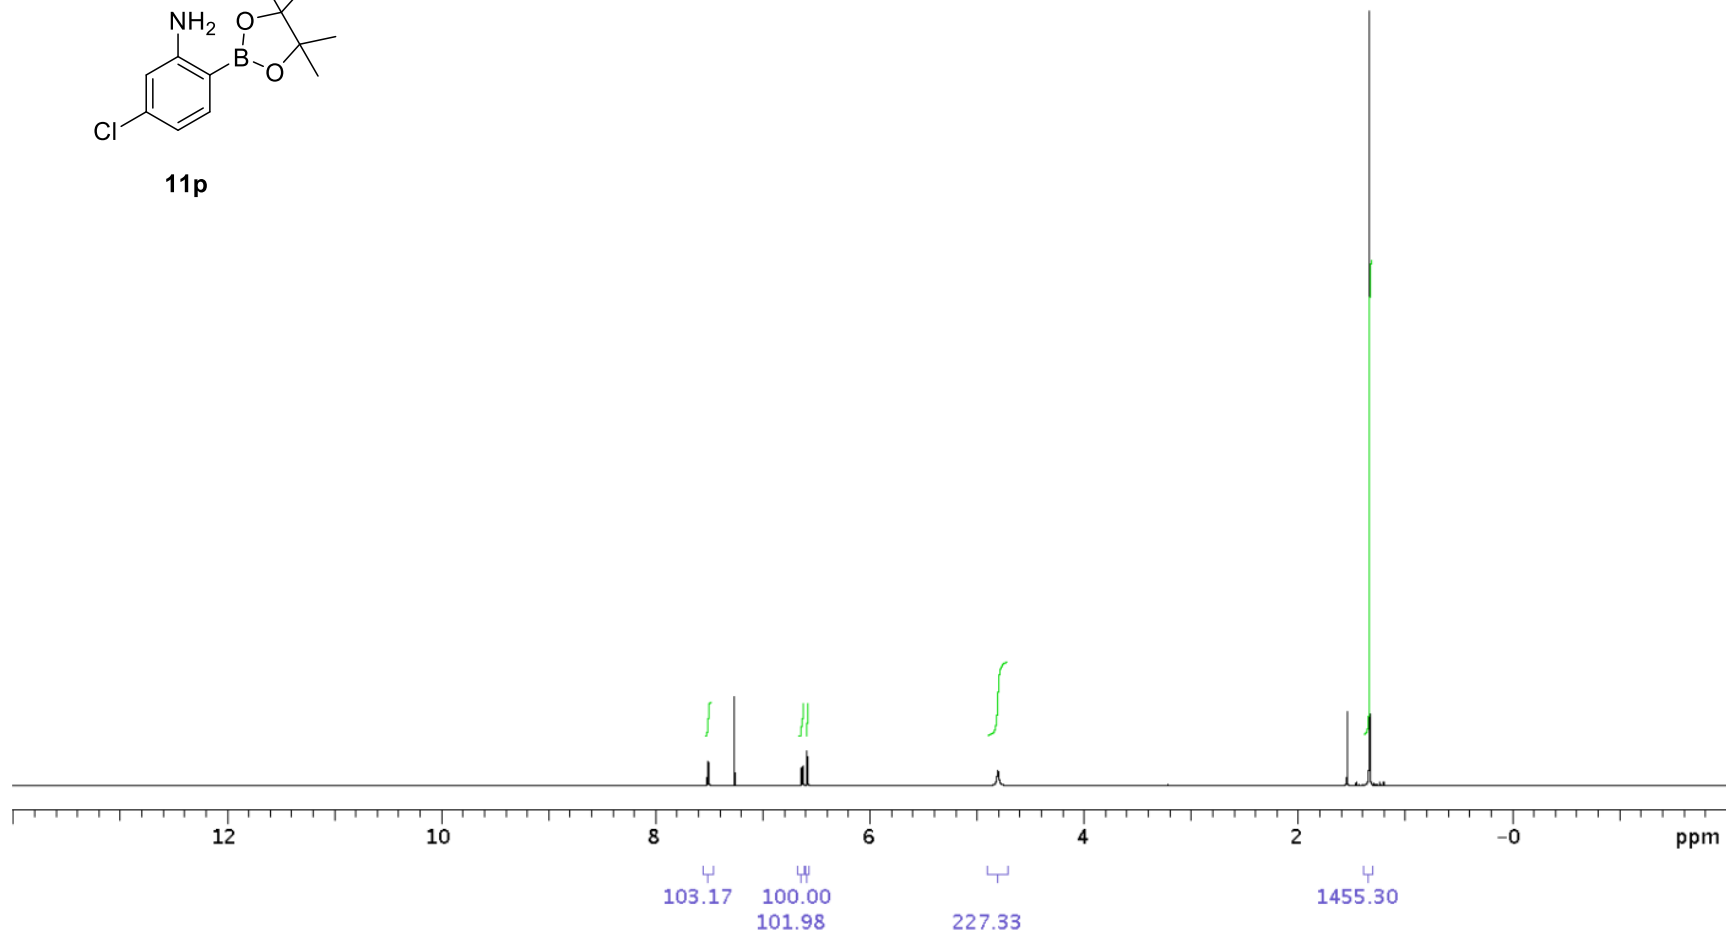



<sup>13</sup>C NMR (125 MHz, CDCl<sub>3</sub>) 5-chloro-2-(4,4,5,5-tetramethyl-1,3,2-dioxaborolan-2-yl)-benzenamine

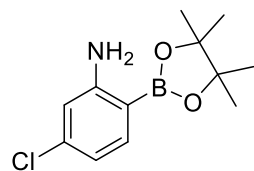

11p

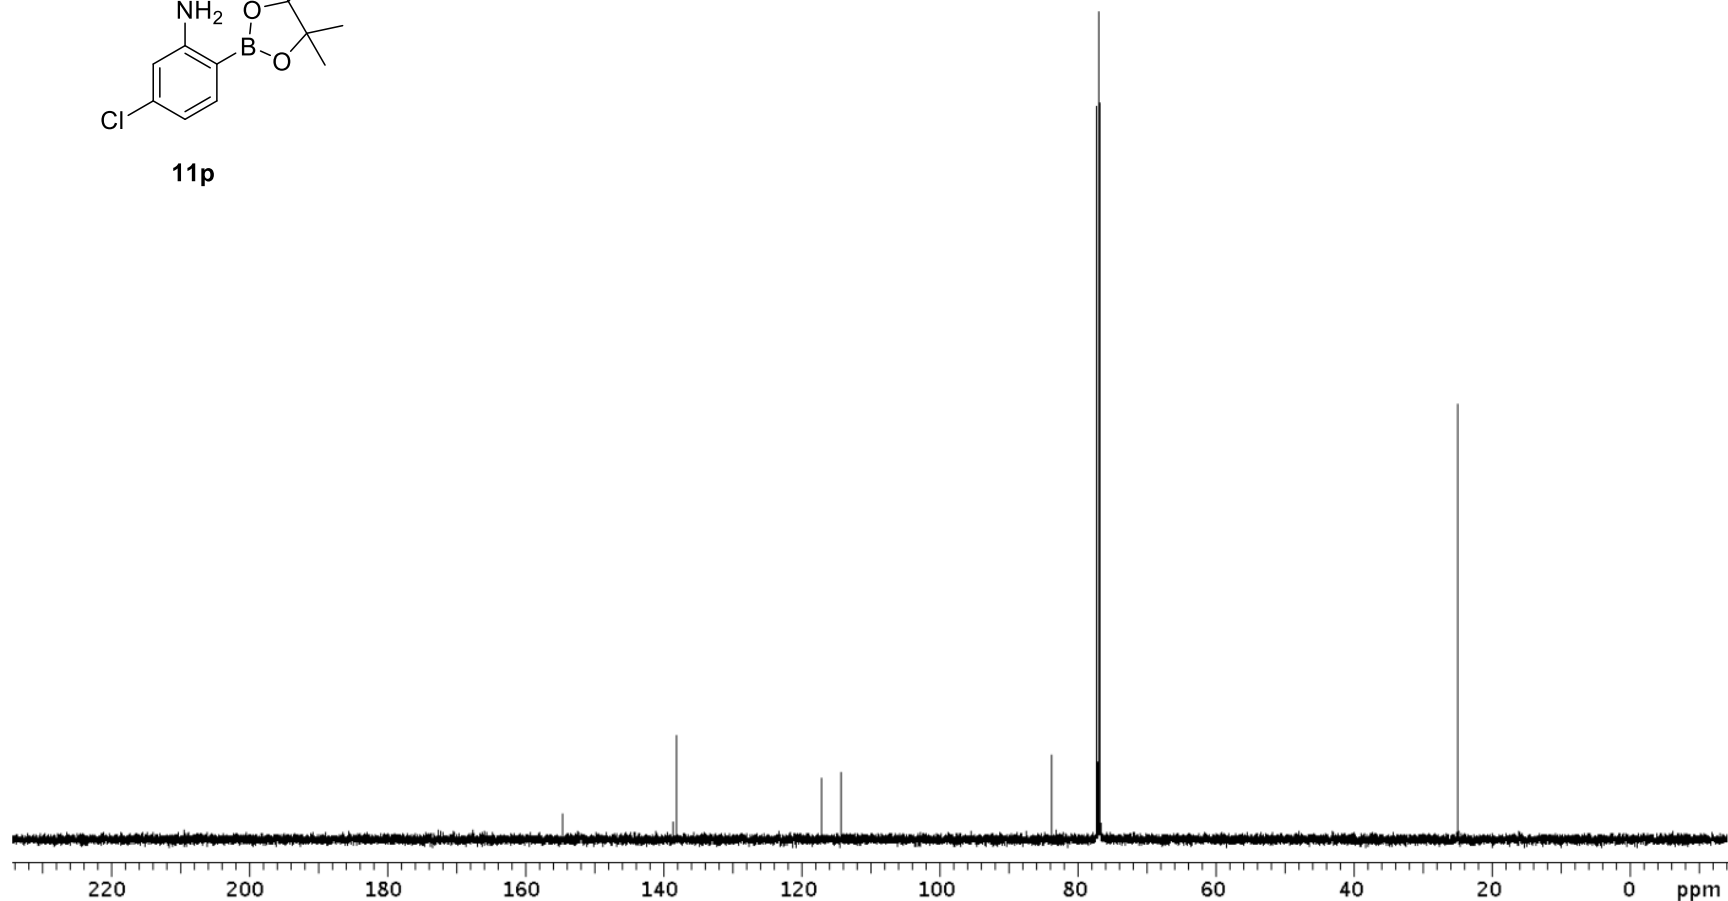

**<sup>1</sup>H NMR (500 MHz, CDCl<sub>3</sub>) 3-chloro-5-(4,4,5,5-tetramethyl-1,3,2-dioxaborolan-2-yl)aniline**

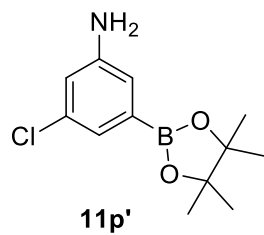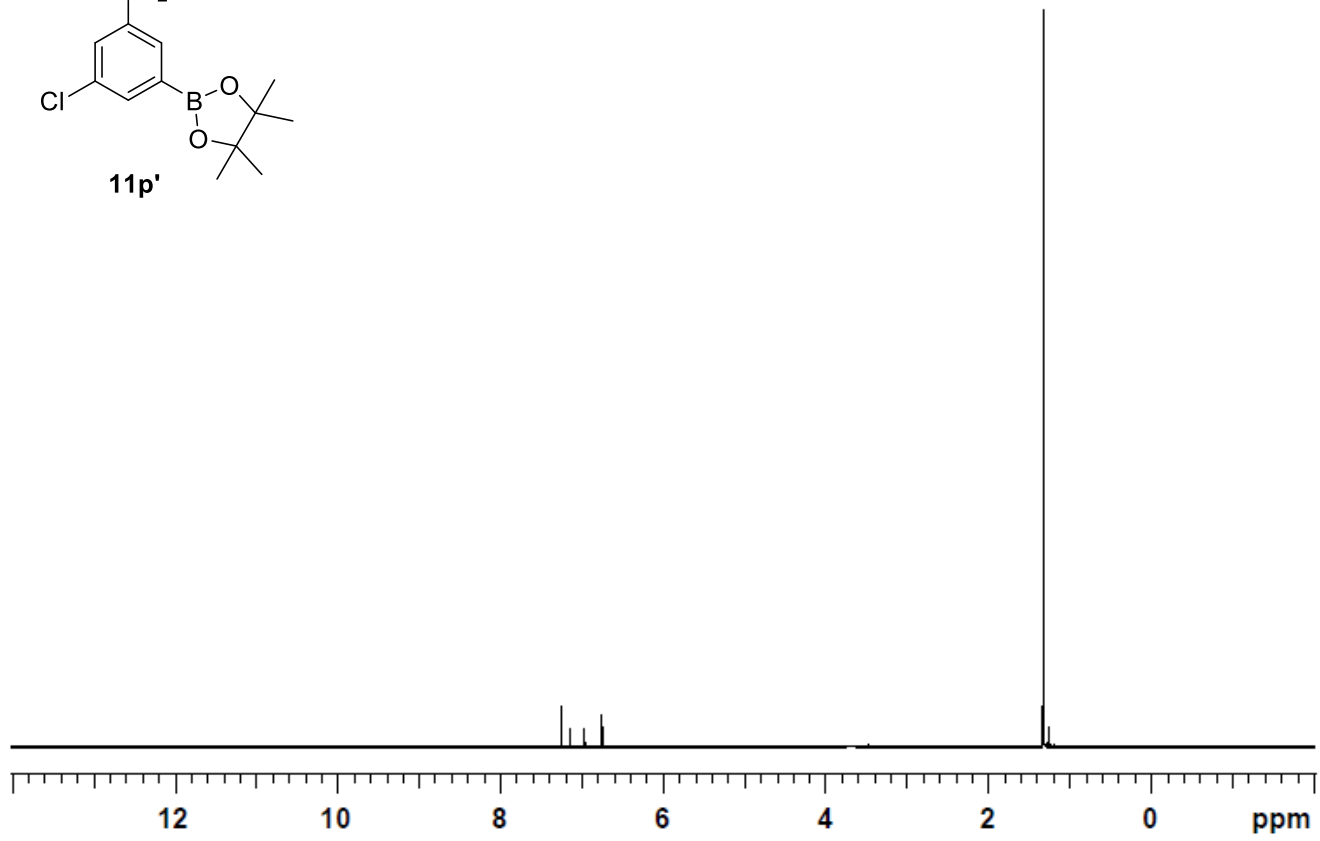

$^{13}\text{C}$  NMR (125 MHz,  $\text{CDCl}_3$ ) 3-chloro-5-(4,4,5,5-tetramethyl-1,3,2-dioxaborolan-2-yl)aniline

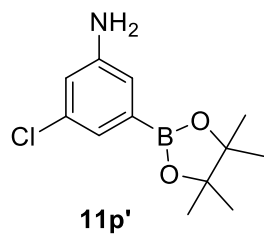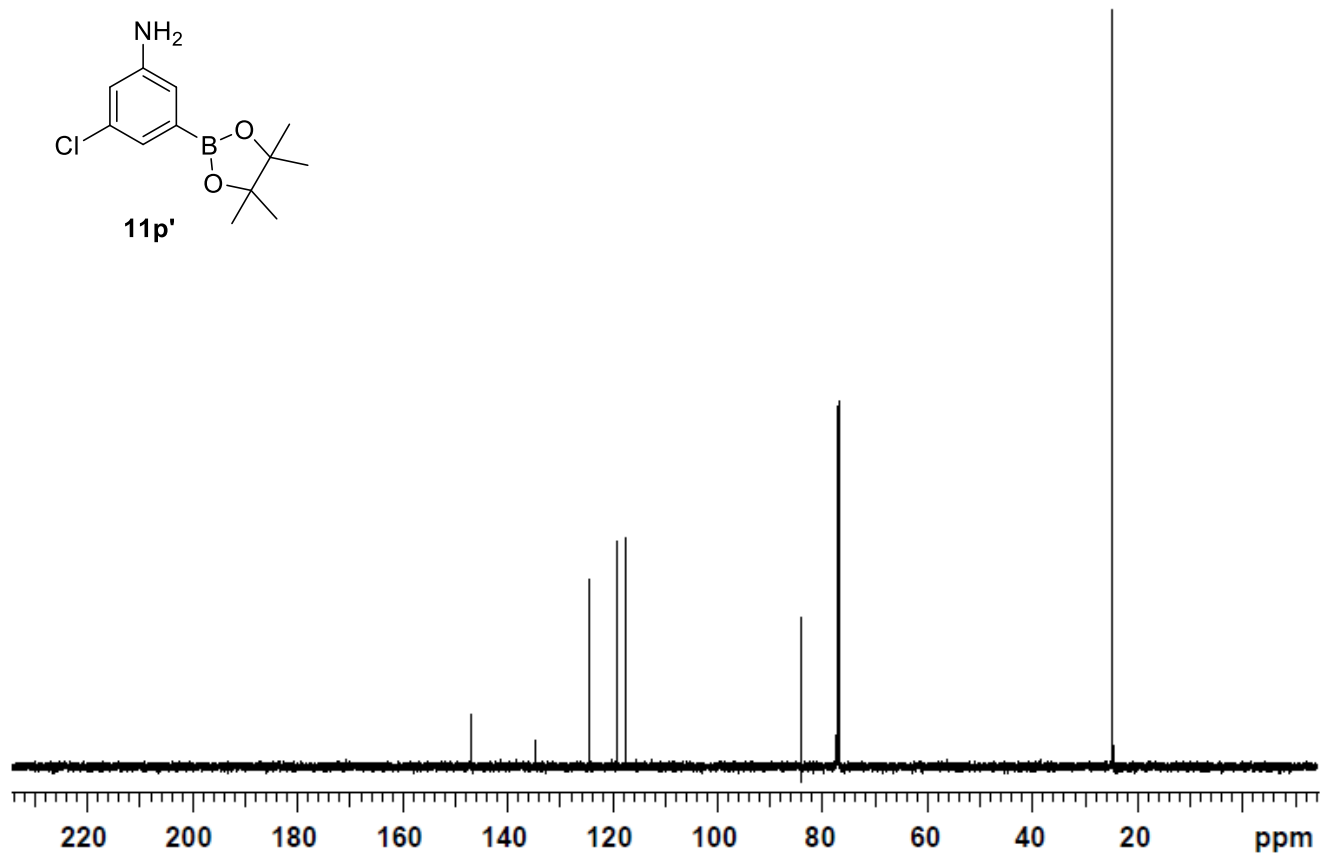

<sup>1</sup>H NMR (500 MHz, CDCl<sub>3</sub>) N-methyl-3-chloro-5-(4,4,5,5-tetramethyl-1,3,2-dioxaborolan-2-yl)-benzenamine

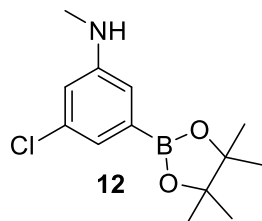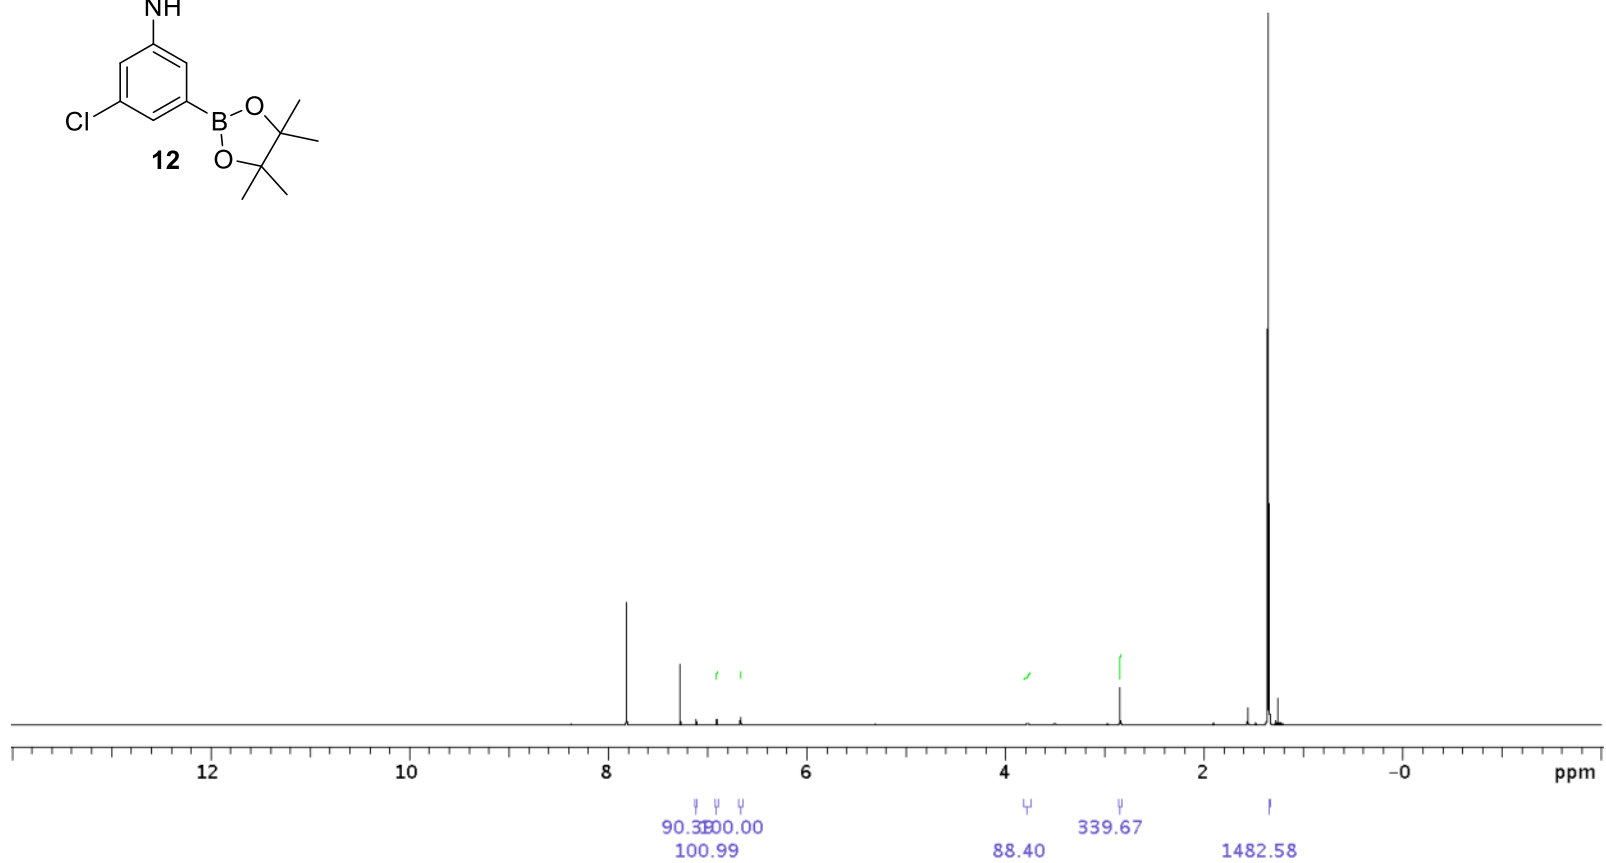

<sup>13</sup>C NMR (125 MHz, CDCl<sub>3</sub>) N-methyl-3-chloro-5-(4,4,5,5-tetramethyl-1,3,2-dioxaborolan-2-yl)-benzenamine

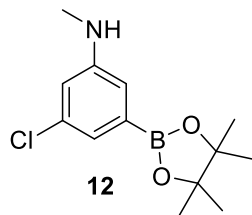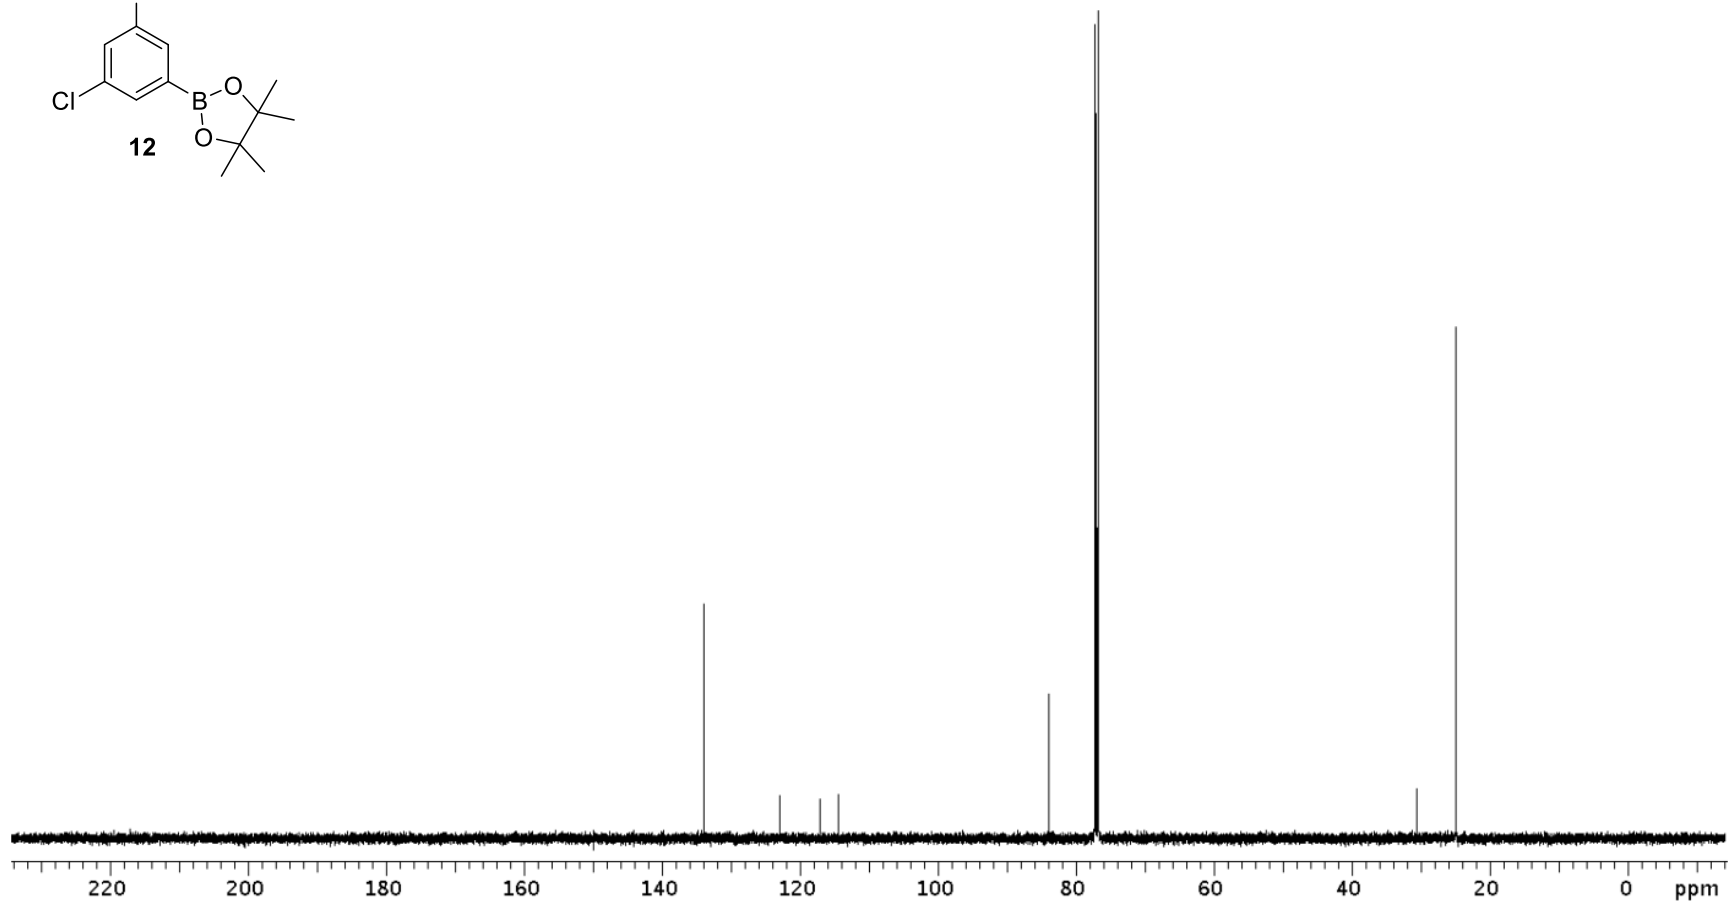

**<sup>1</sup>H NMR (500 MHz, CDCl<sub>3</sub>) 2-methoxy-4-(4,4,5,5-tetramethyl-1,3,2-dioxaborolan-2-yl)-benzenamine**

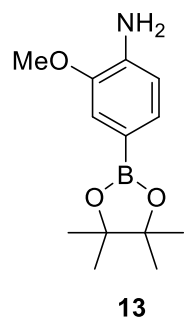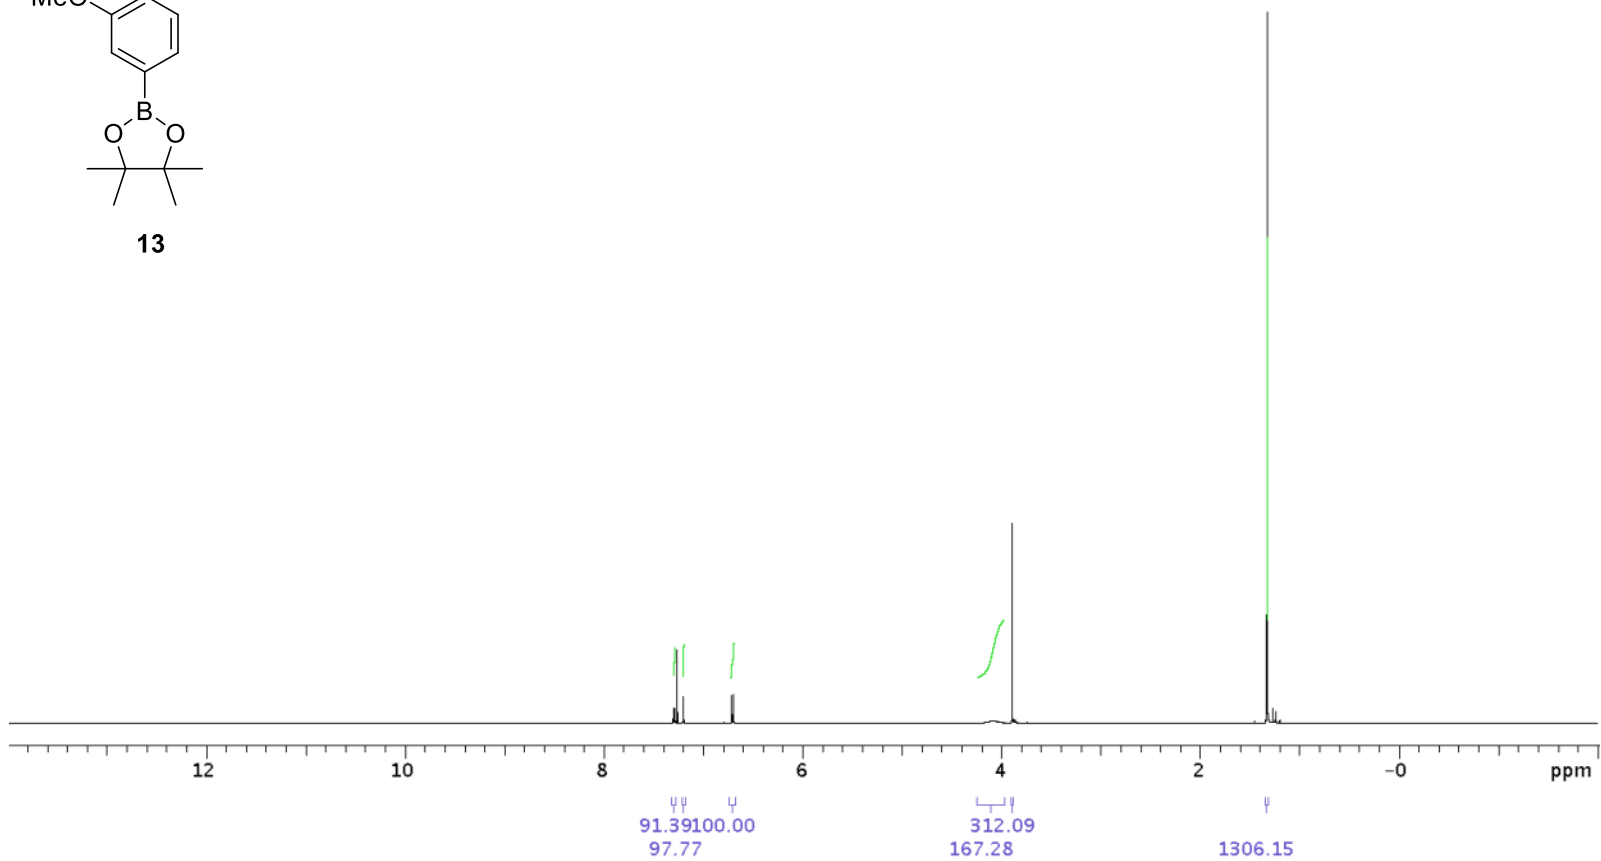

$^{13}\text{C}$  NMR (125 MHz,  $\text{CDCl}_3$ ) 2-methoxy-4-(4,4,5,5-tetramethyl-1,3,2-dioxaborolan-2-yl)-benzenamine

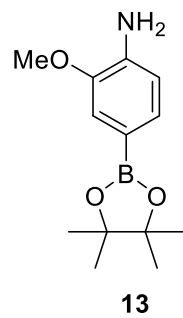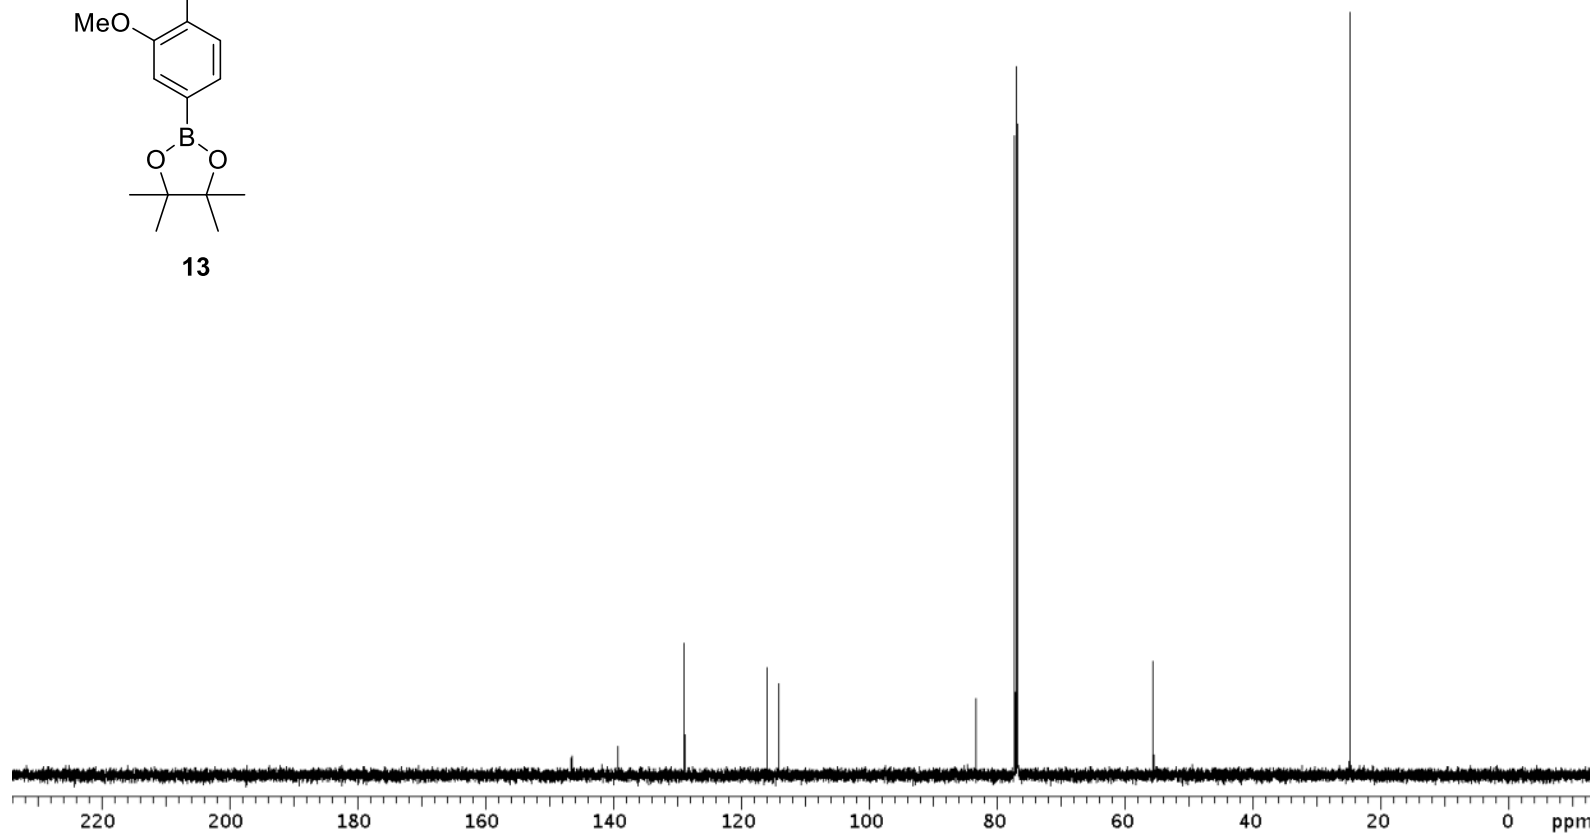

**<sup>1</sup>H NMR (500 MHz, CDCl<sub>3</sub>) 5-amino-2-chloro-4-(4,4,5,5-tetramethyl-1,3,2-dioxaborolan-2-yl)-pyridine**

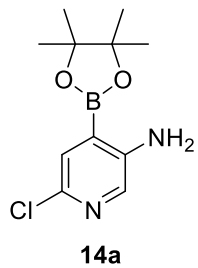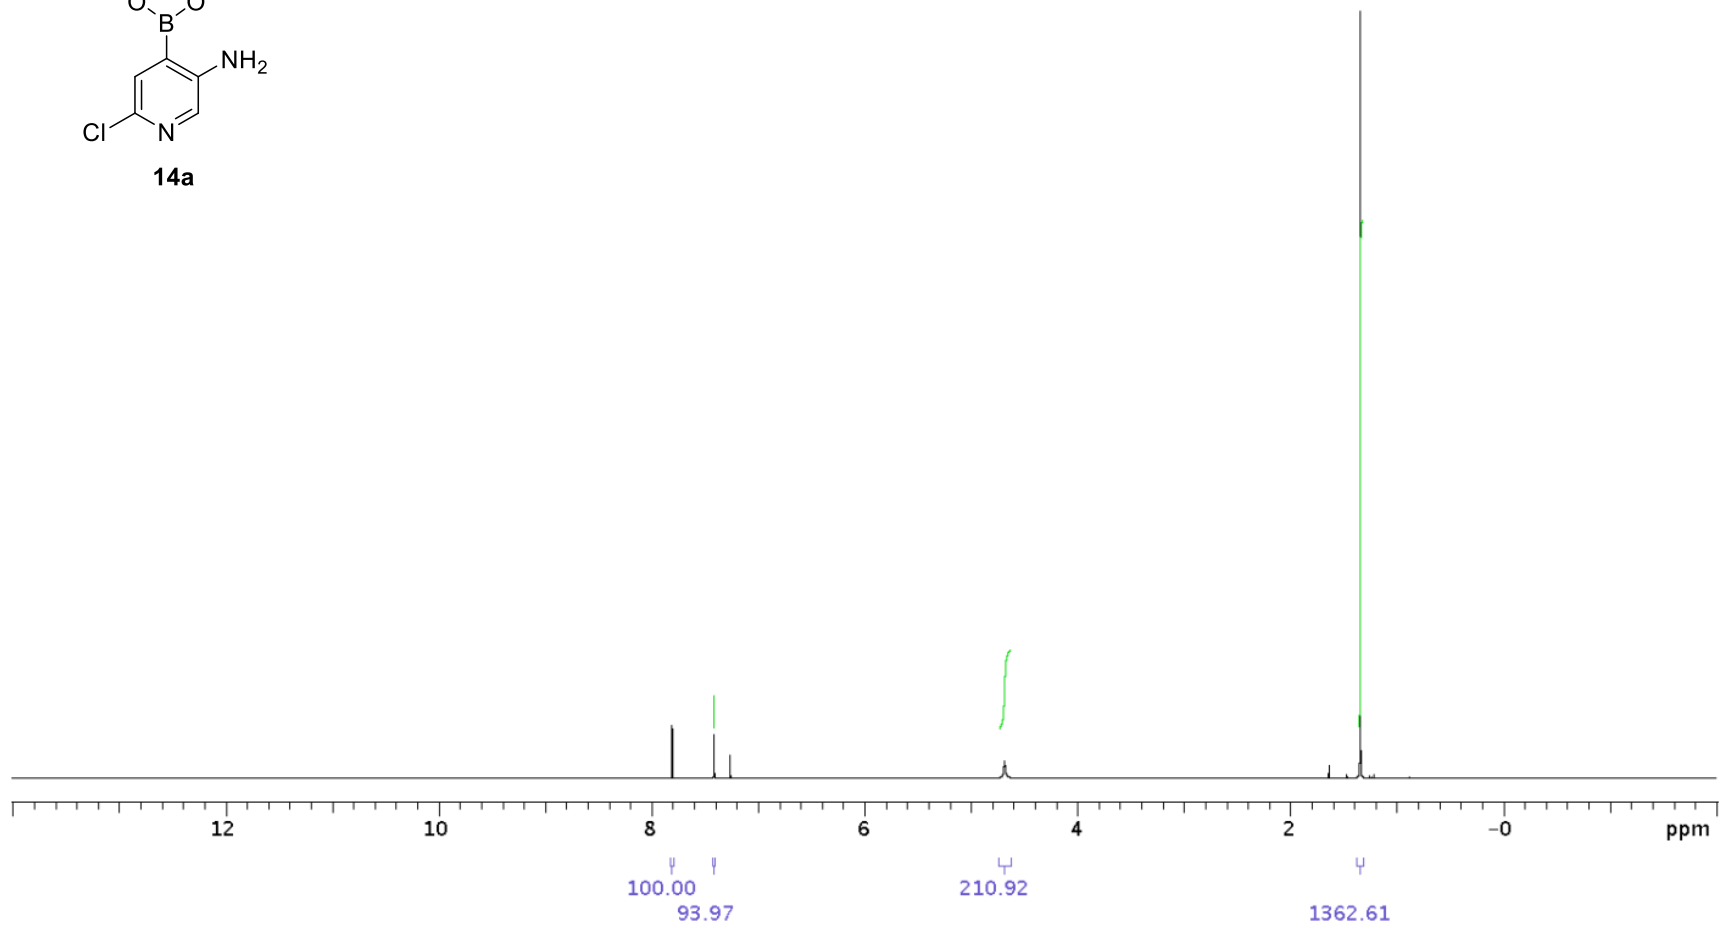



**<sup>13</sup>C NMR (125 MHz, CDCl<sub>3</sub>) 5-amino-2-chloro-4-(4,4,5,5-tetramethyl-1,3,2-dioxaborolan-2-yl)-pyridine**

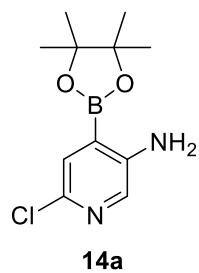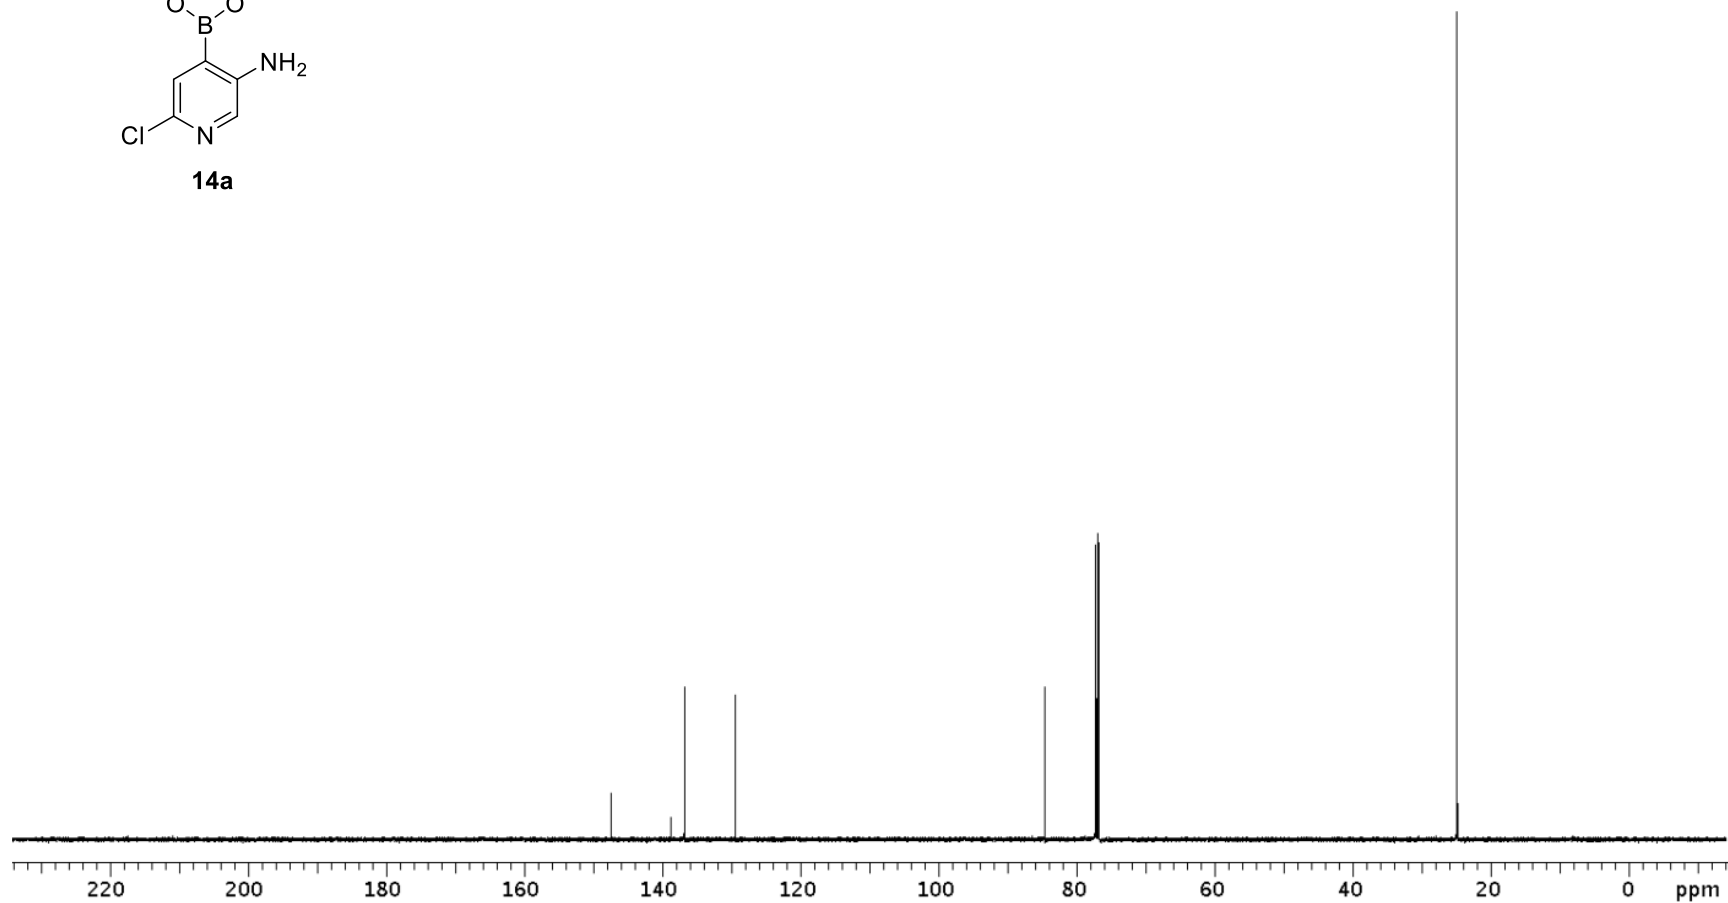

**<sup>1</sup>H NMR (500 MHz, CD<sub>2</sub>Cl<sub>2</sub>) 5-amino-4-(4,4,5,5-tetramethyl-1,3,2-dioxaborolan-2-yl)-2-methyl pyridine**

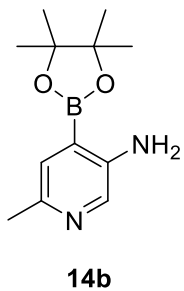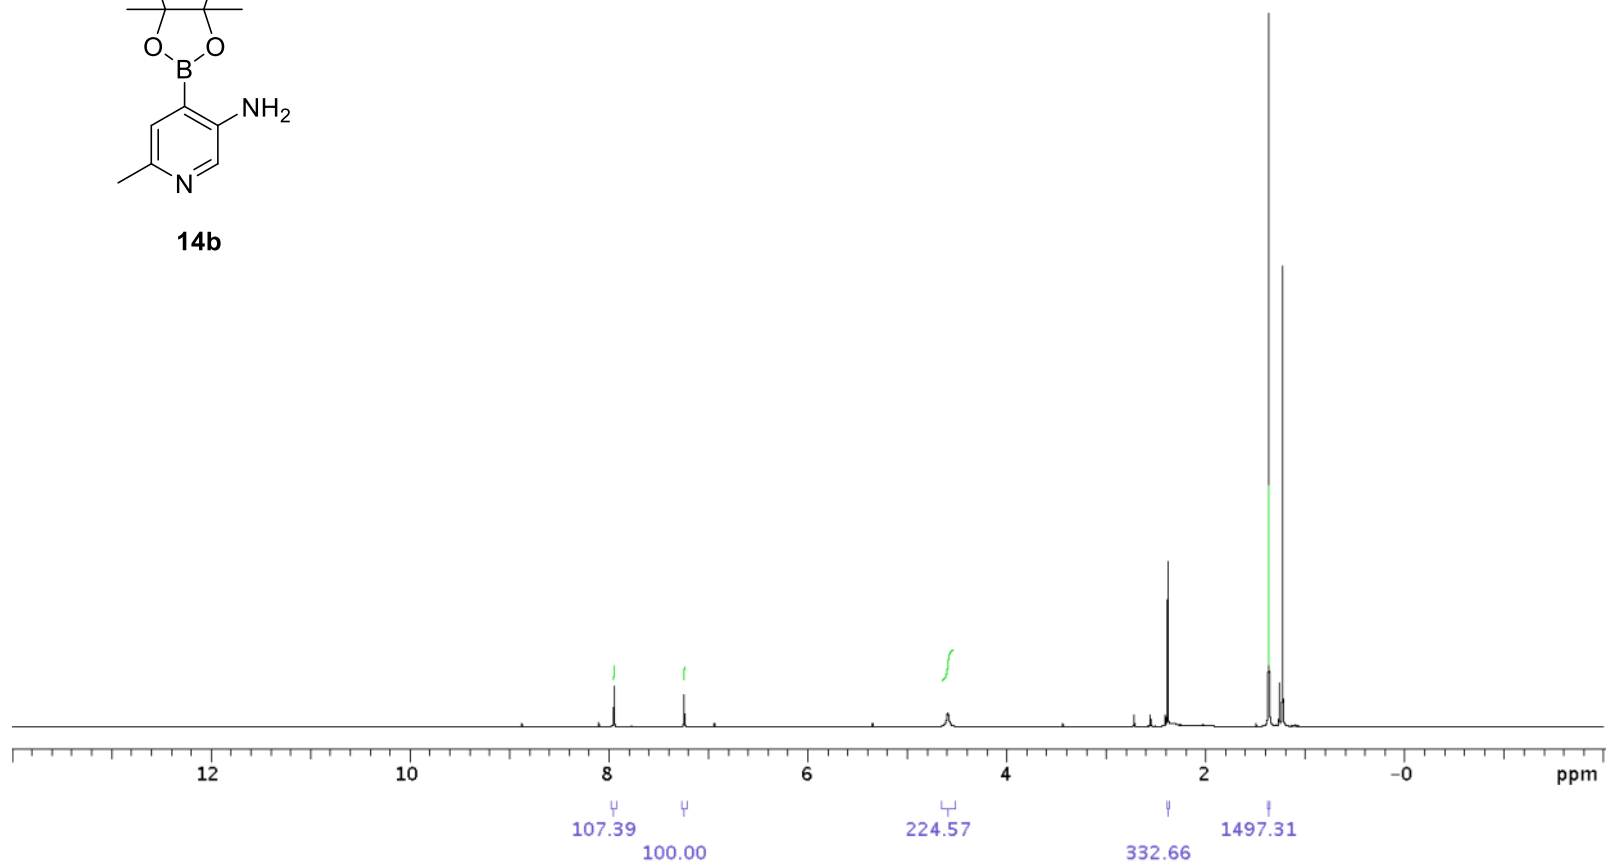

<sup>13</sup>C NMR (125 MHz, CD<sub>2</sub>Cl<sub>2</sub>) 5-amino-4-(4,4,5,5-tetramethyl-1,3,2-dioxaborolan-2-yl)-2-methyl pyridine

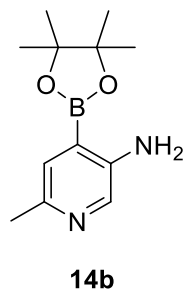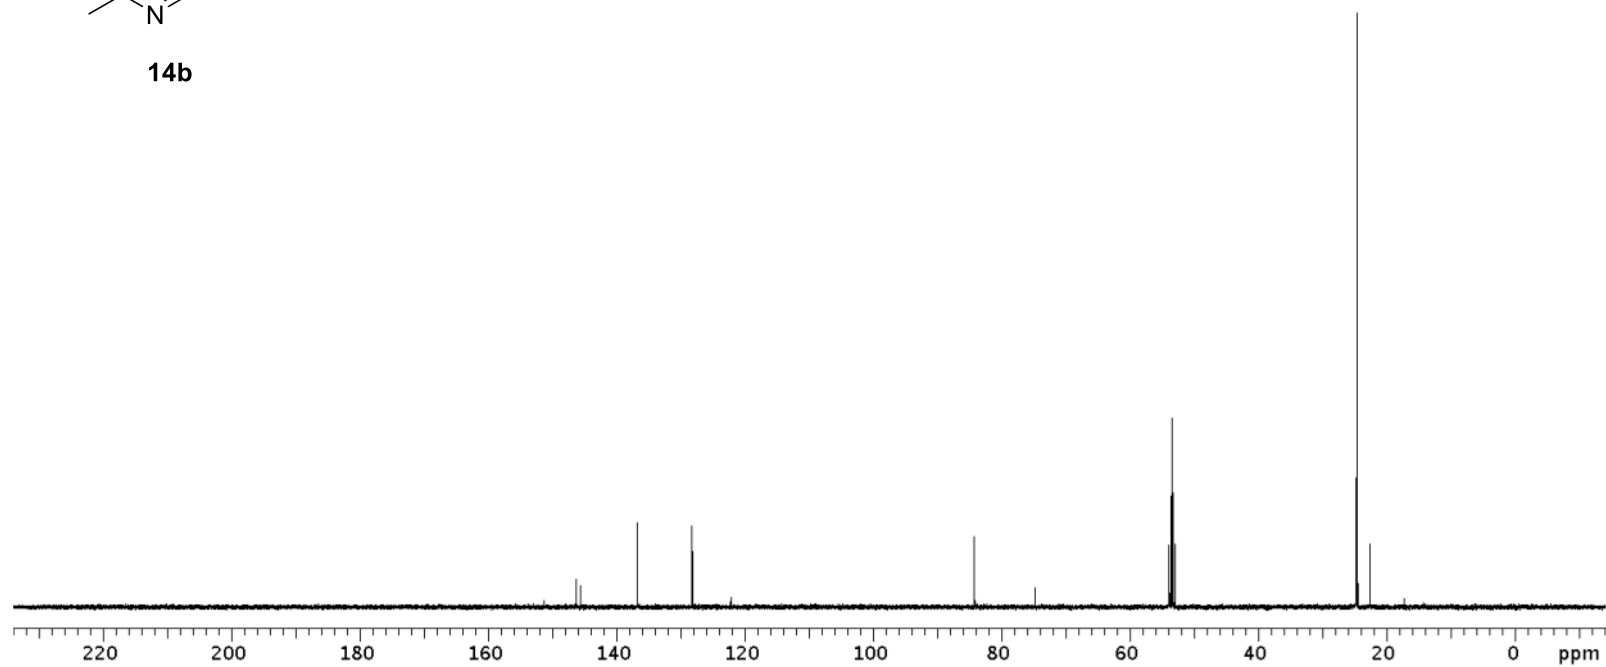

**<sup>1</sup>H NMR (500 MHz, CDCl<sub>3</sub>) 2-chloro-5-(4,4,5,5-tetramethyl-1,3,2-dioxaborolan-2-yl)pyridin-4-amine**

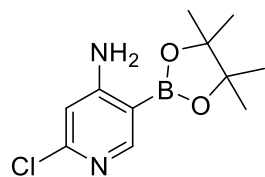

**14c**

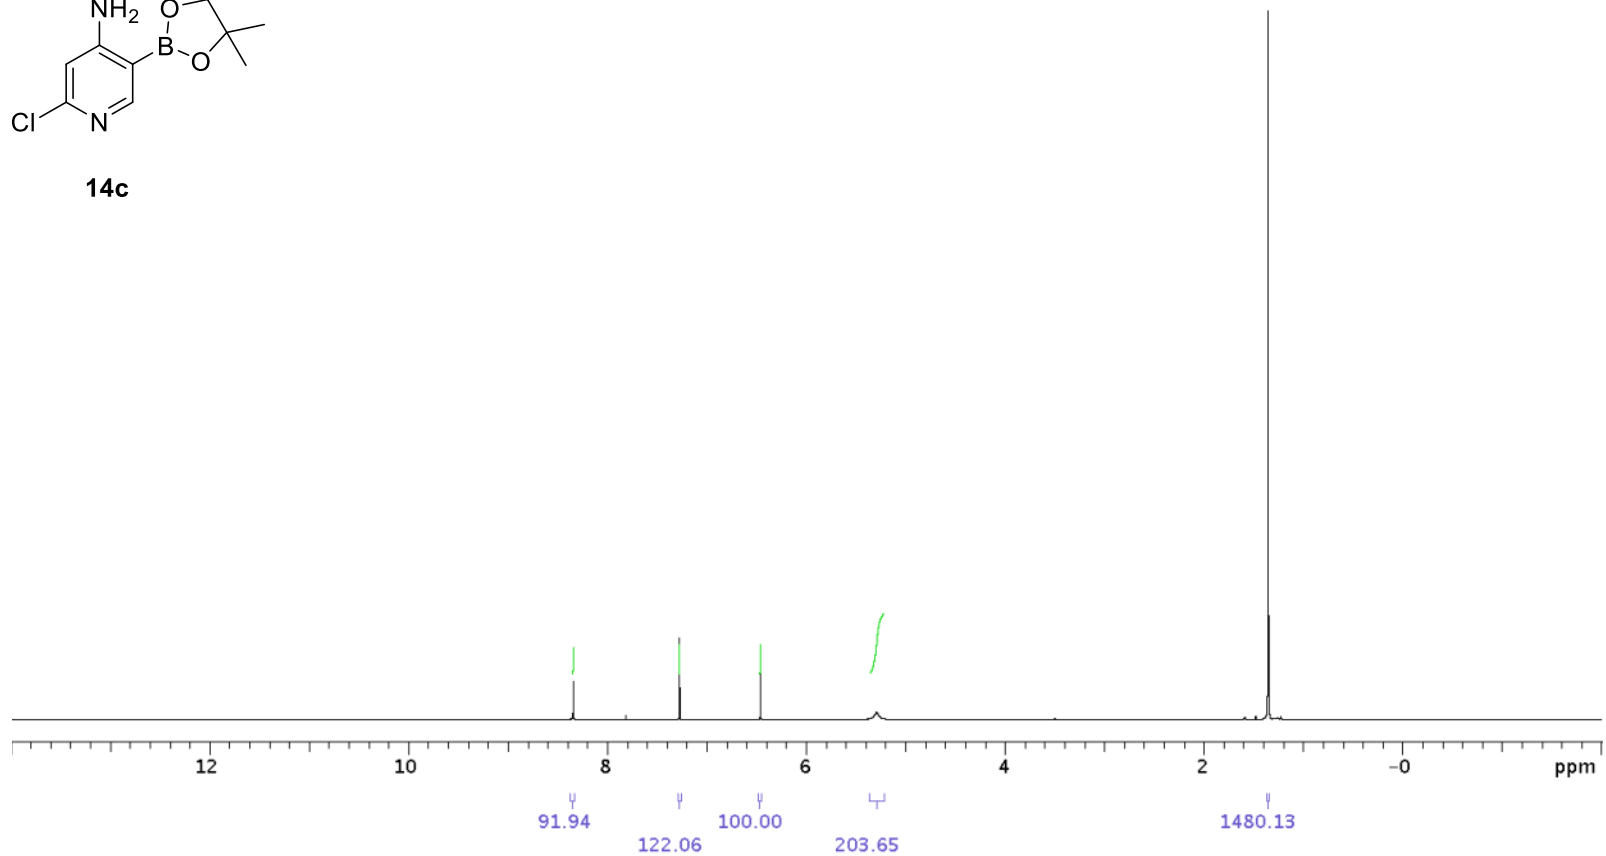

<sup>13</sup>C NMR (125 MHz, CDCl<sub>3</sub>) 2-chloro-5-(4,4,5,5-tetramethyl-1,3,2-dioxaborolan-2-yl)pyridin-4-amine

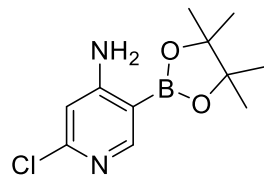

**14c**

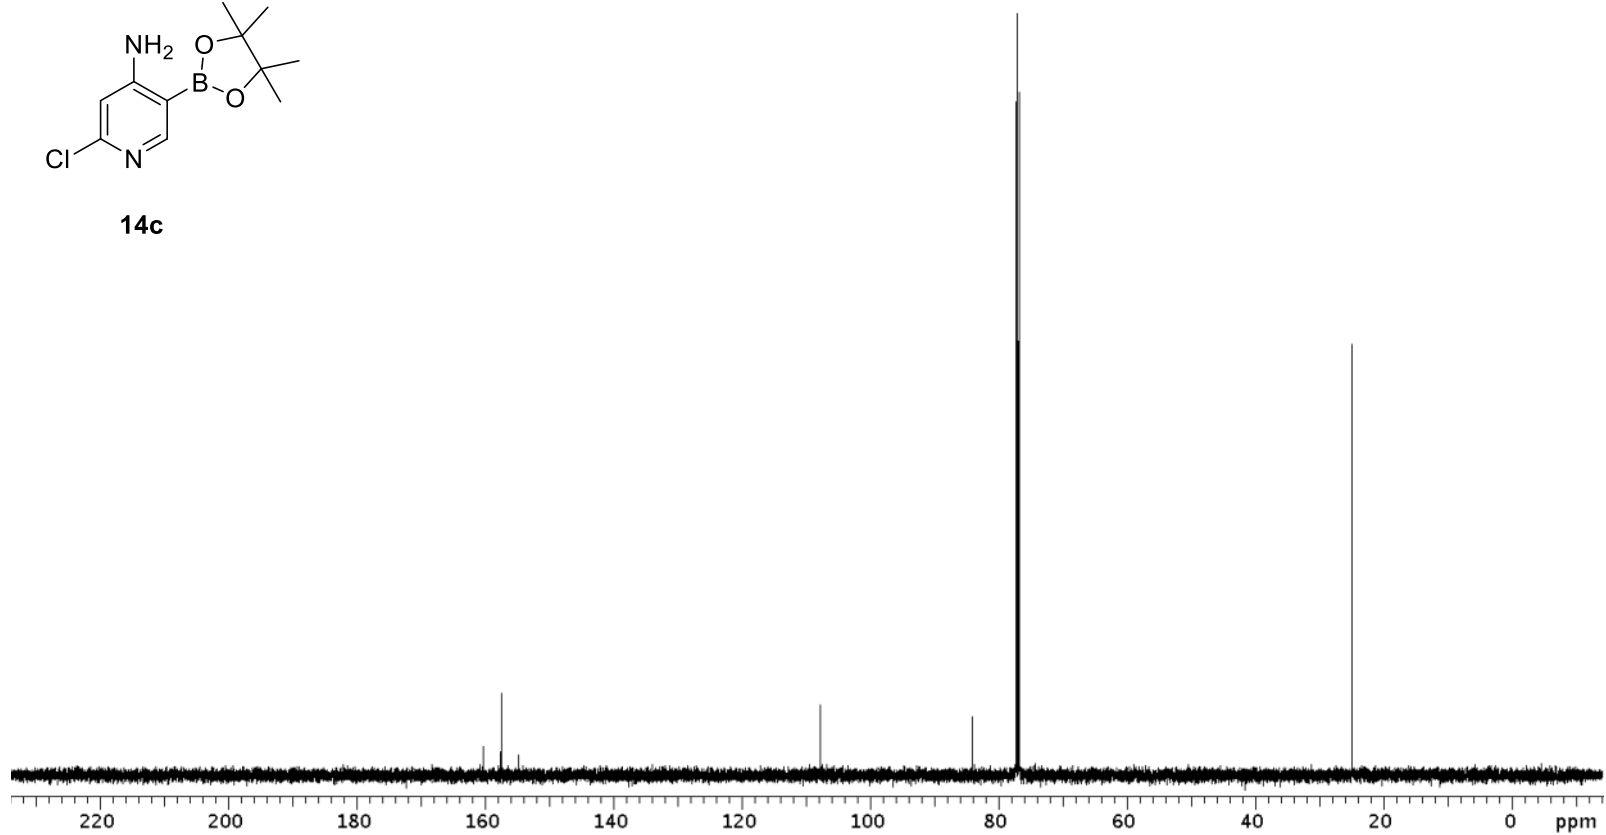

**<sup>1</sup>H NMR (500 MHz, CDCl<sub>3</sub>) 2-methoxy-5-(4,4,5,5-tetramethyl-1,3,2-dioxaborolan-2-yl)pyridin-4-amine**

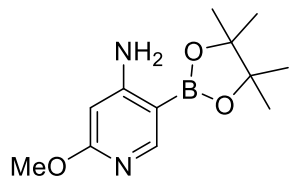

**14d**

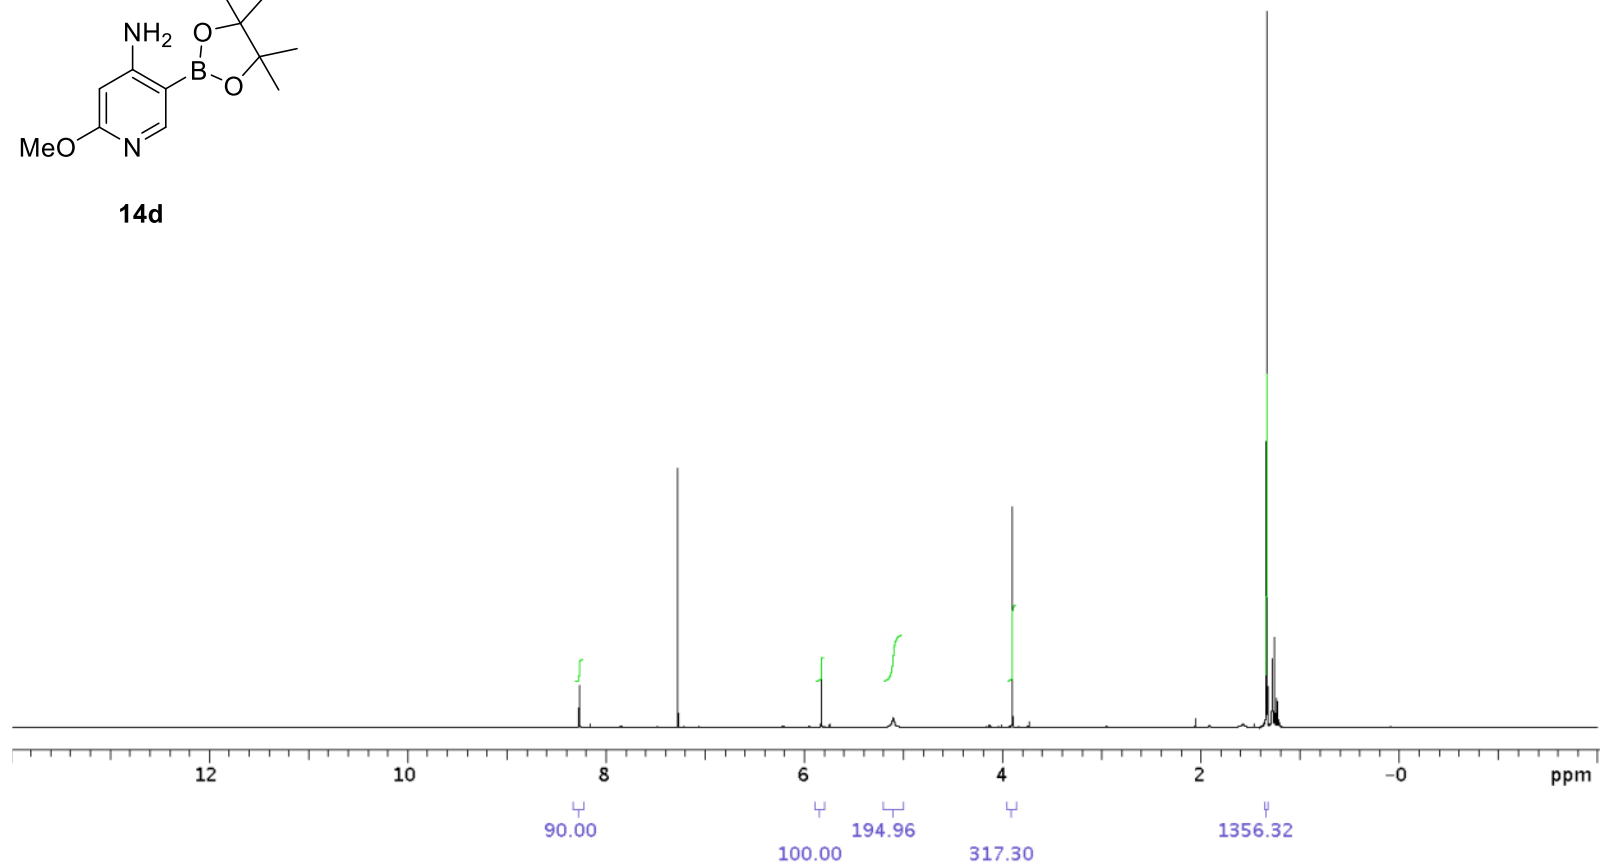

<sup>13</sup>C NMR (125 MHz, CDCl<sub>3</sub>) 2-methoxy-5-(4,4,5,5-tetramethyl-1,3,2-dioxaborolan-2-yl)pyridin-4-amine

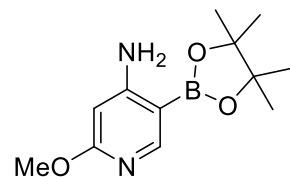

14d

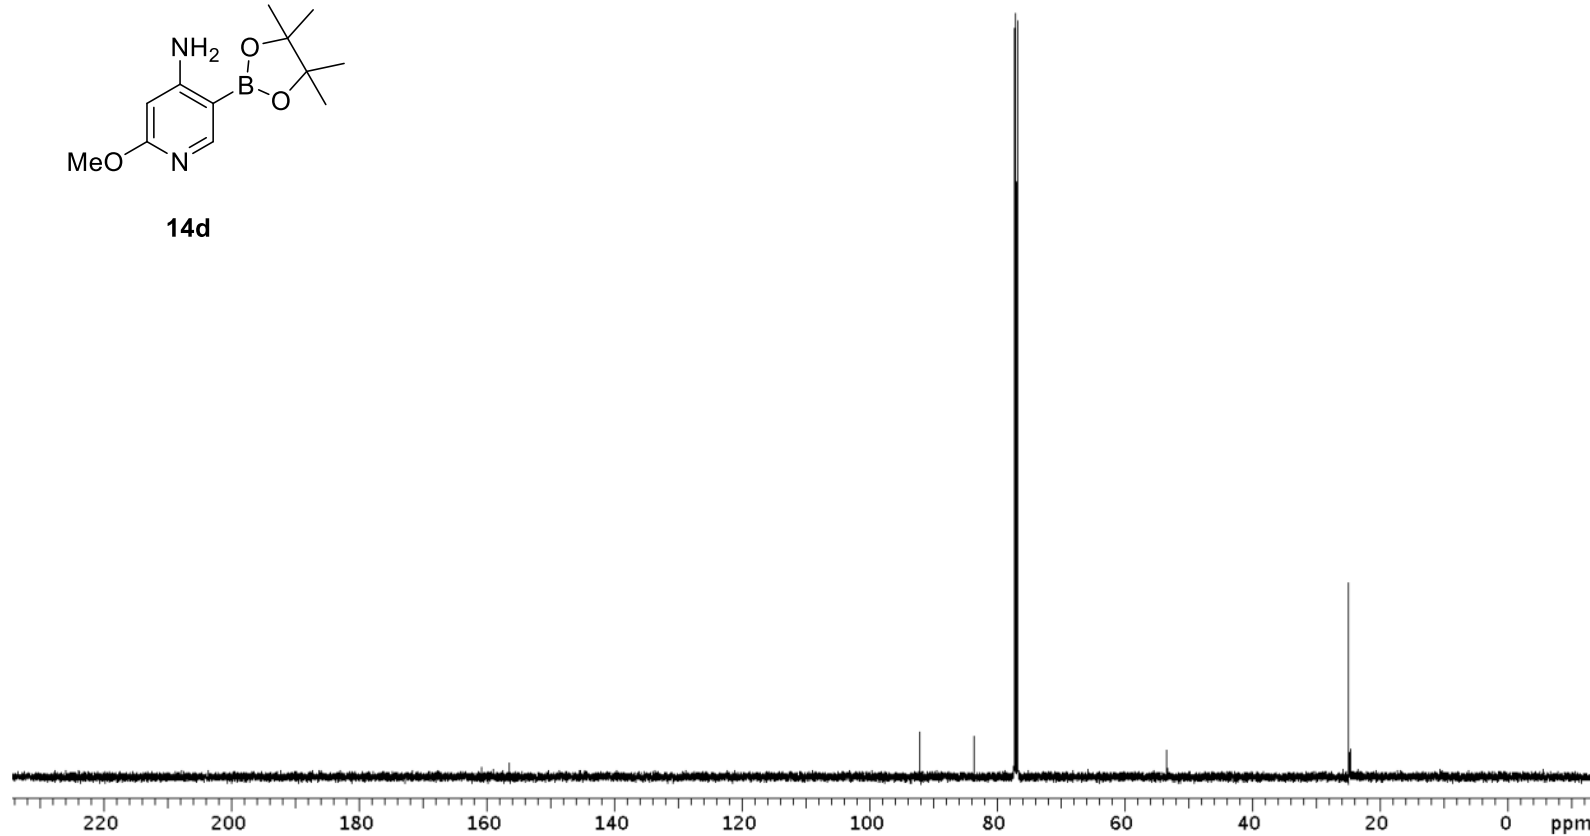

**<sup>1</sup>H NMR (500 MHz, CDCl<sub>3</sub>) 4-(4,4,5,5-tetramethyl-1,3,2-dioxaborolan-2-yl)-6-(trifluoromethyl)pyridin-2-amine**

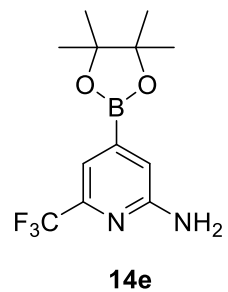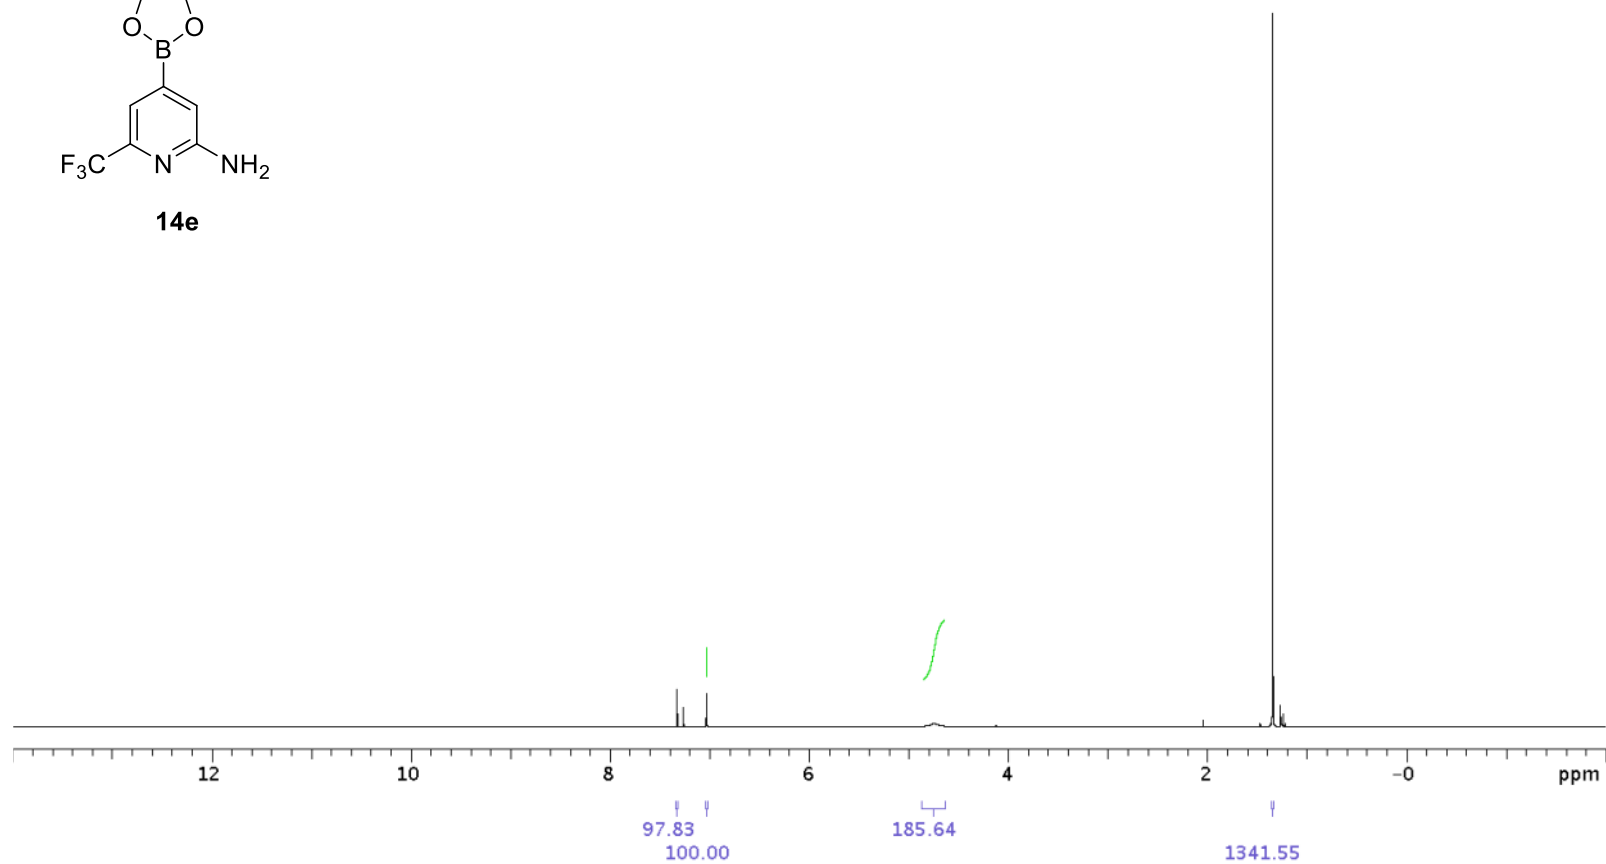



**<sup>13</sup>C NMR (125 MHz, CDCl<sub>3</sub>) 4-(4,4,5,5-tetramethyl-1,3,2-dioxaborolan-2-yl)-6-(trifluoromethyl)pyridin-2-amine**

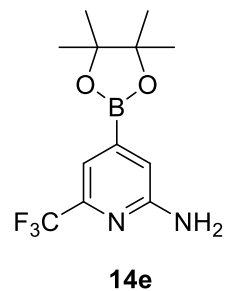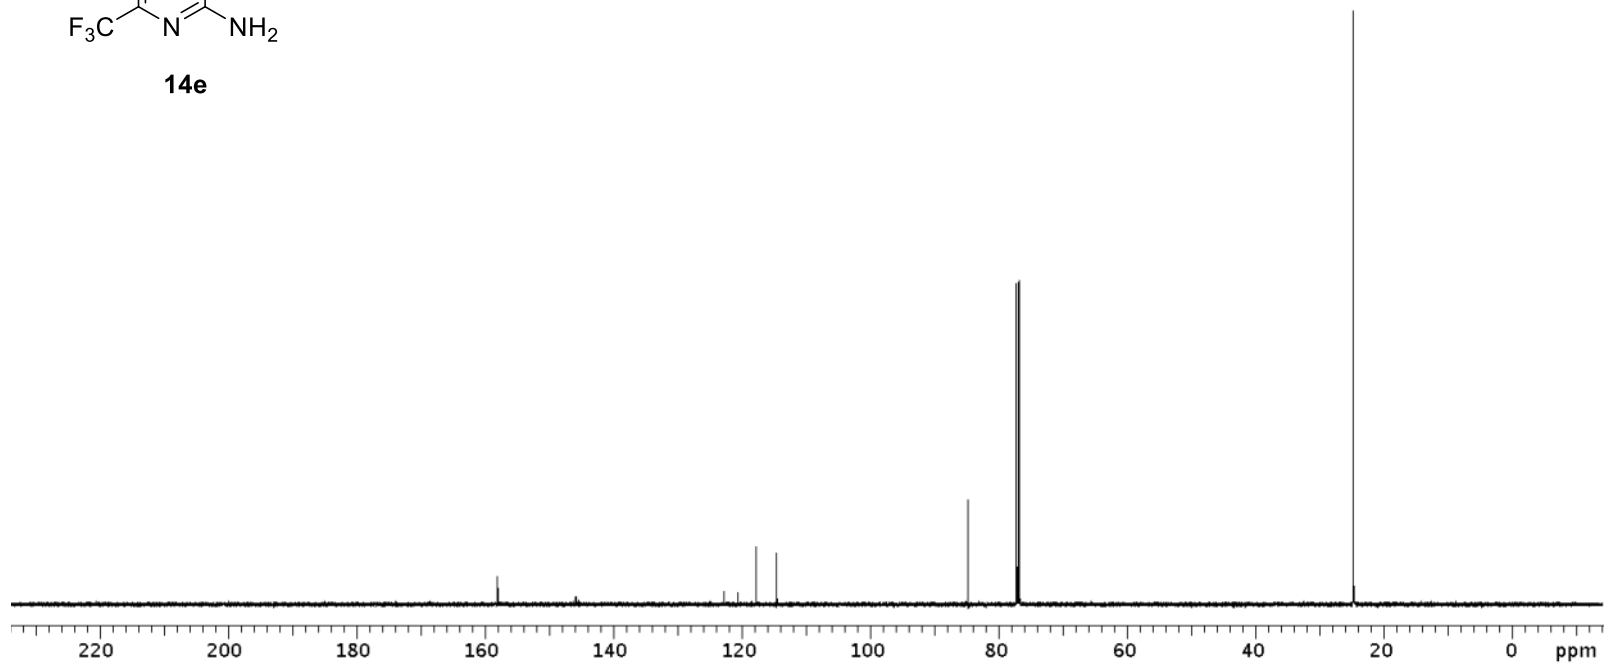

**<sup>1</sup>H NMR (500 MHz, CDCl<sub>3</sub>) 6-chloro-4-(4,4,5,5-tetramethyl-1,3,2-dioxaborolan-2-yl)pyridin-2-amine**

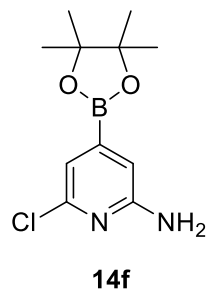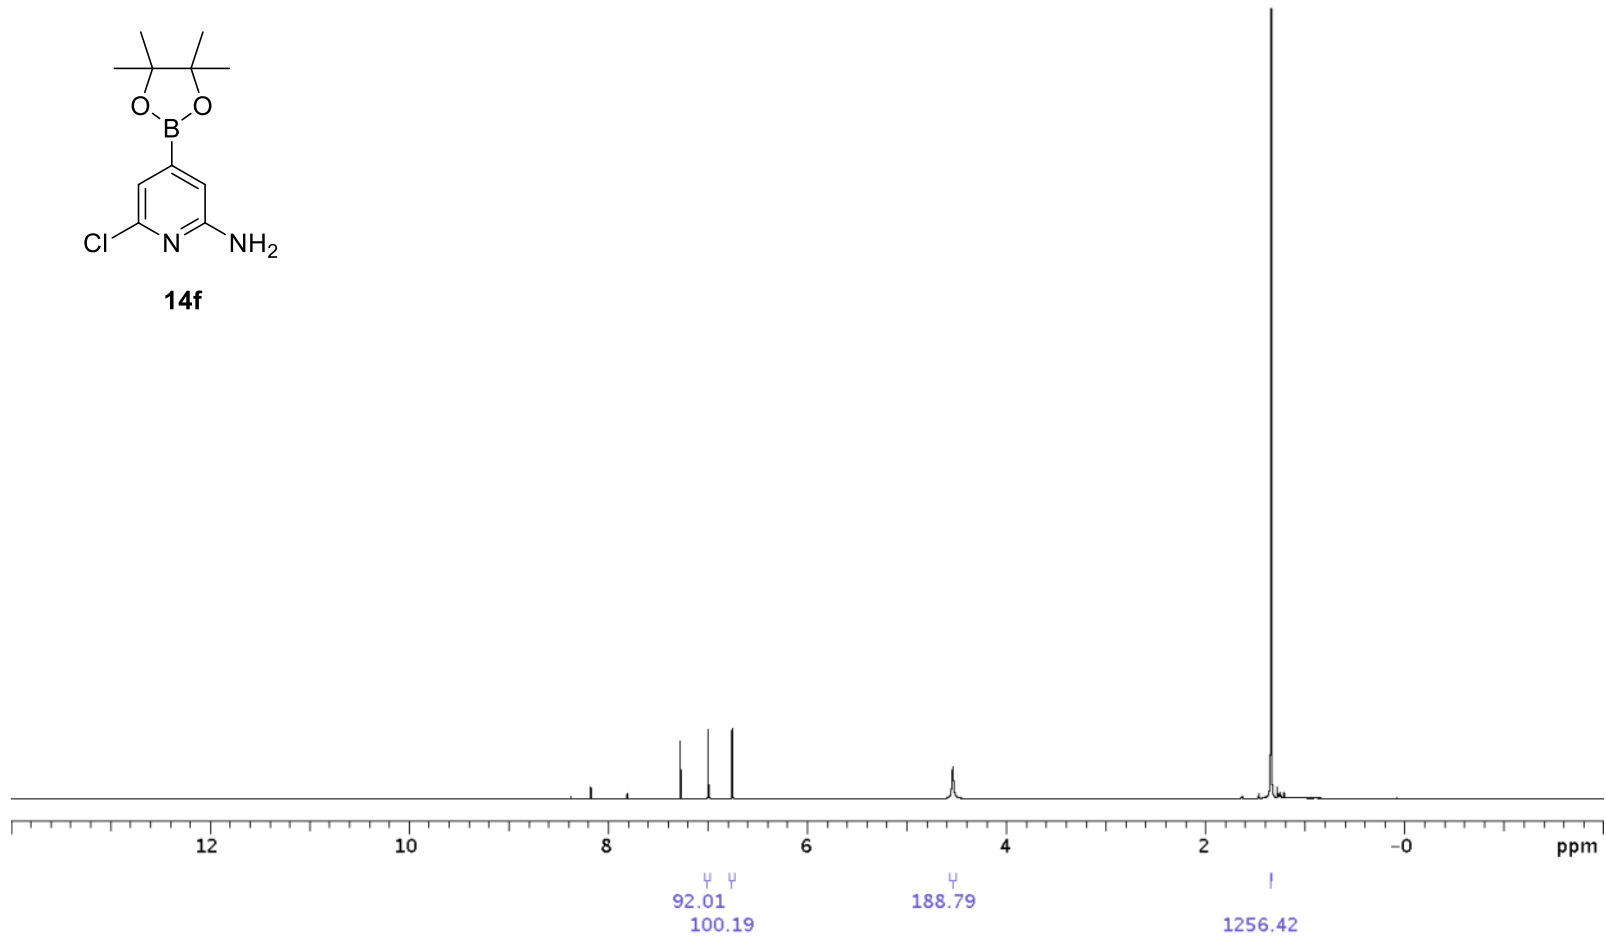

<sup>13</sup>C NMR (125 MHz, CDCl<sub>3</sub>) 6-chloro-4-(4,4,5,5-tetramethyl-1,3,2-dioxaborolan-2-yl)pyridin-2-amine

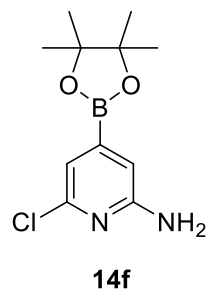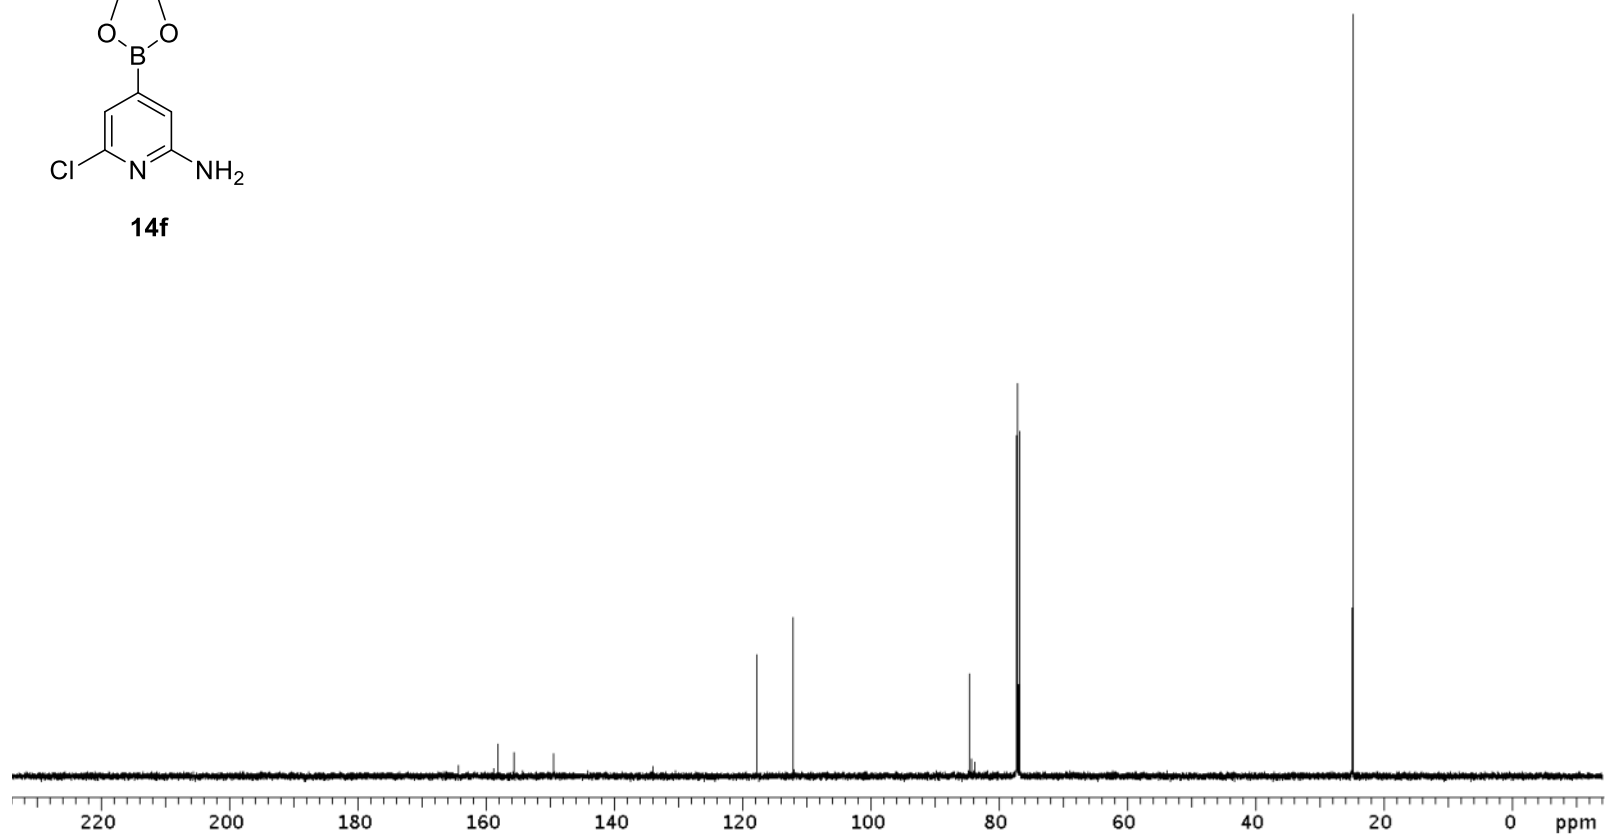

**<sup>1</sup>H NMR (500 MHz, CDCl<sub>3</sub>) 2,4-bis(4,4,5,5-tetramethyl-1,3,2-dioxaborolan-2-yl)aniline**

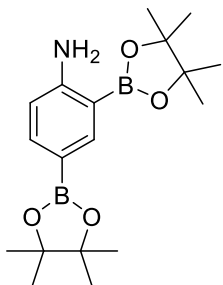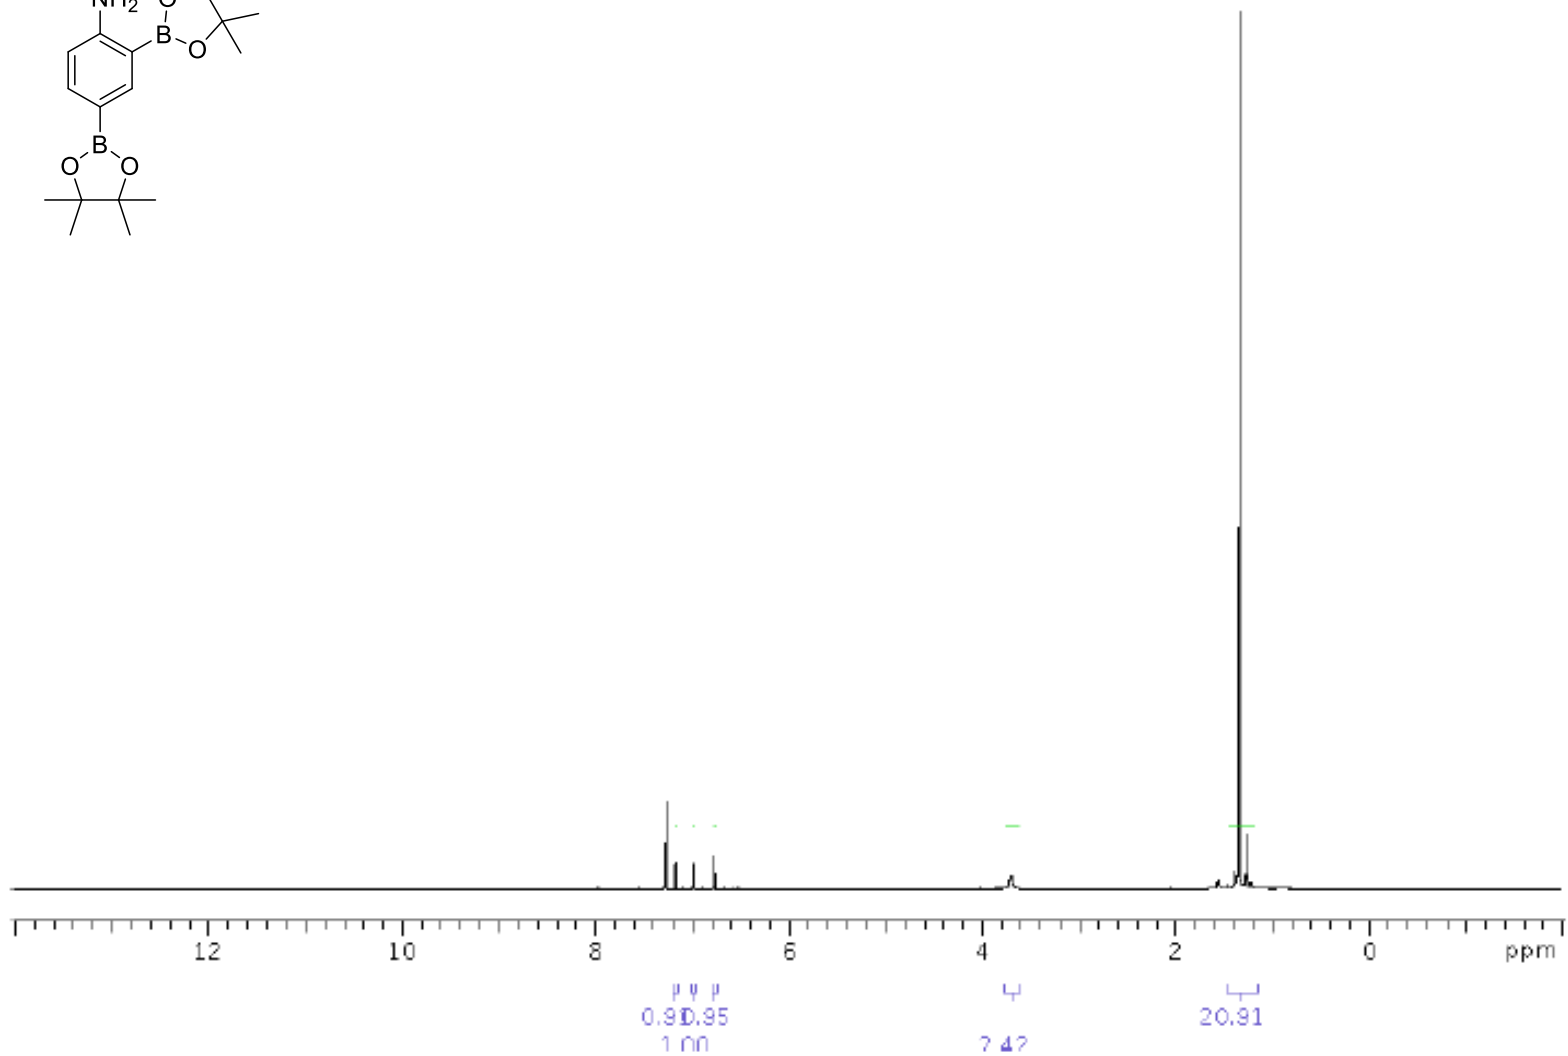

<sup>13</sup>C NMR (125 MHz, CDCl<sub>3</sub>) 2,4-bis(4,4,5,5-tetramethyl-1,3,2-dioxaborolan-2-yl)aniline

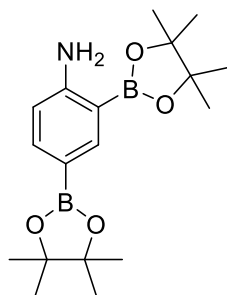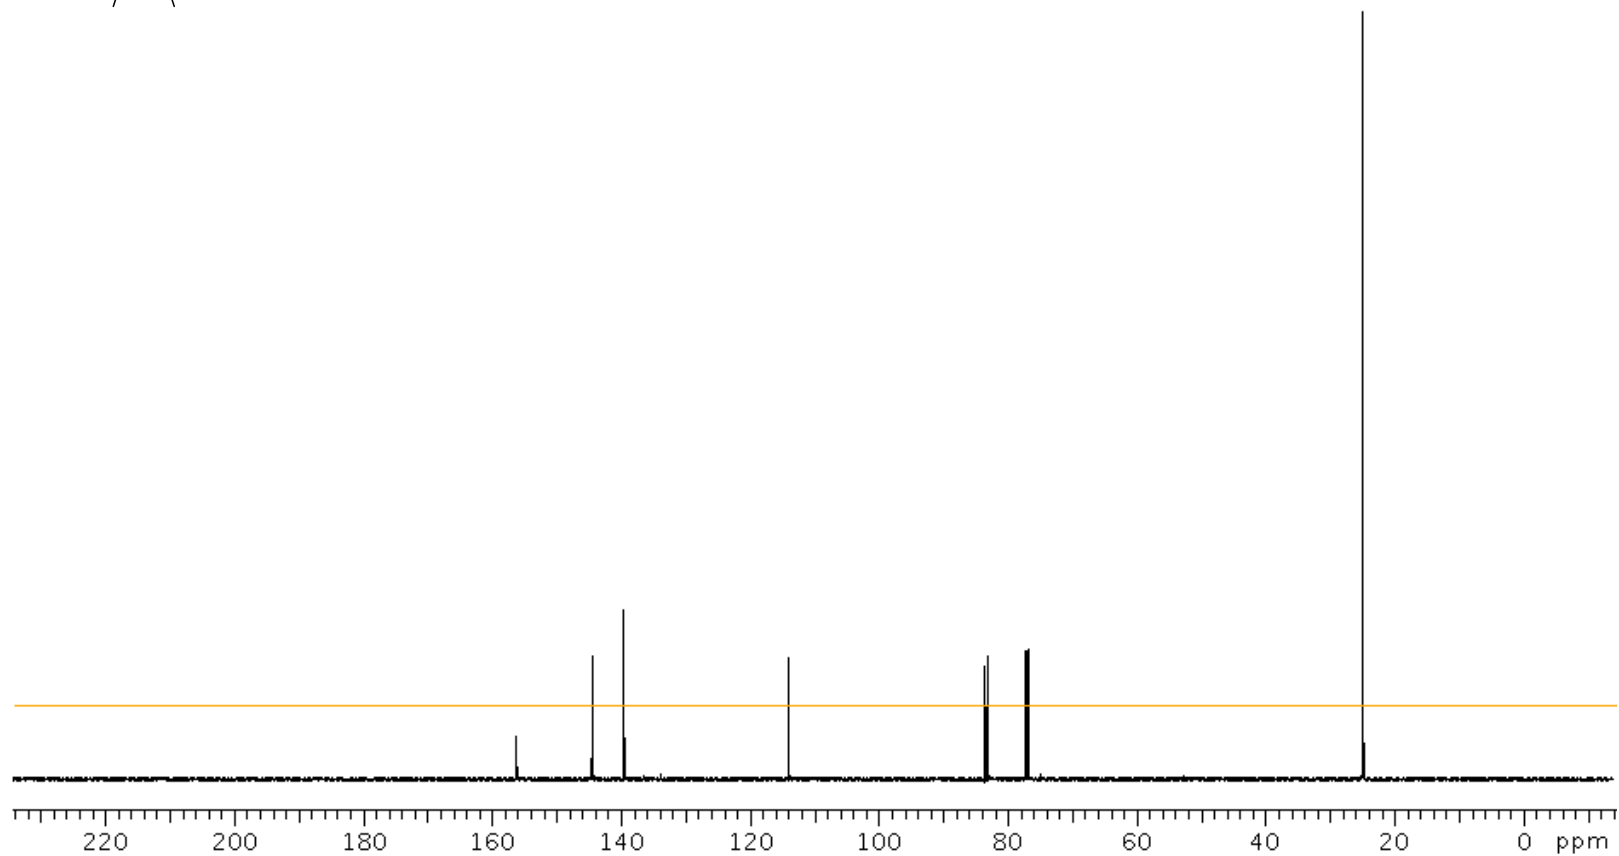

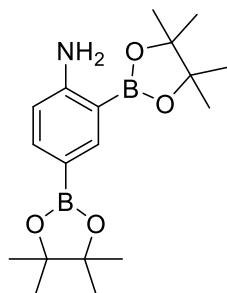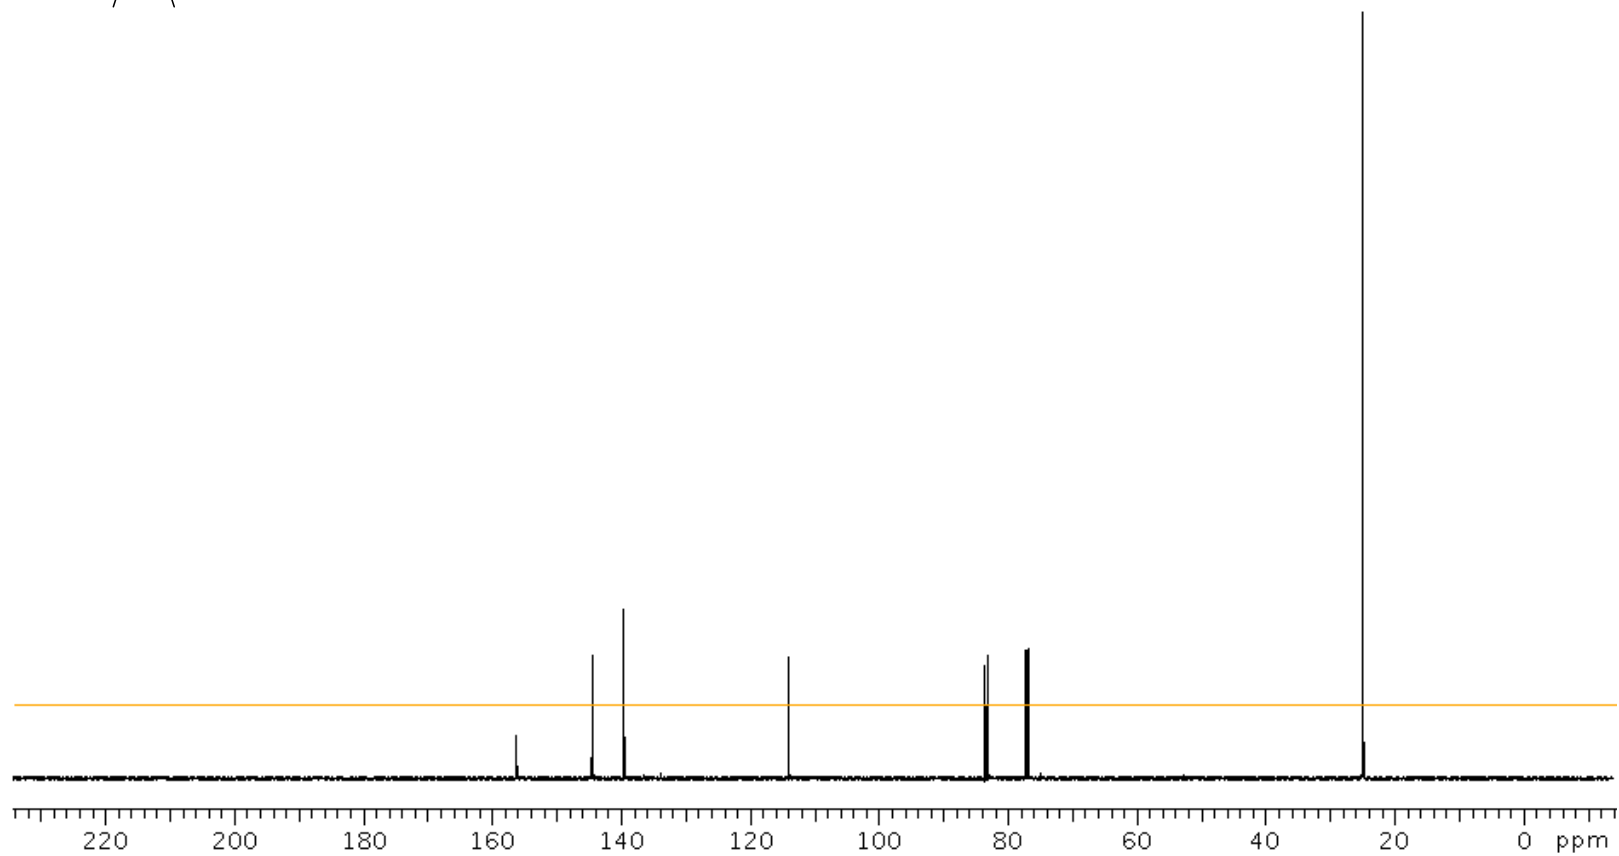

## Theoretical Methods

The structures and energies for all stationary points were obtained using Gaussian 09.<sup>1</sup> Vibrational frequency analyses were carried out on all stationary points.

### 2-Bpinindole

RB3LYP/6-311++G(d,p)

0,1

C,-1.57486359,1.26862889,0.14214053  
C,-0.72095691,0.18960044,0.03060143  
C,-2.91720985,0.78005832,0.08522949  
N,-1.49894003,-0.95940219,-0.09375587  
C,-2.83141429,-0.63347599,-0.06587538  
C,-4.18737258,1.38262874,0.14425201  
H,-1.11725856,-1.8857746,-0.19535045  
C,-3.97171704,-1.44066568,-0.15844139  
C,-5.31521705,0.58488971,0.05296044  
H,-4.27929632,2.45725456,0.25913248  
H,-3.89436392,-2.51633012,-0.27356005  
C,-5.20698863,-0.81475744,-0.09726624  
H,-6.29977747,1.03653552,0.09673475  
H,-6.10952872,-1.41161228,-0.16629405  
H,-1.26179968,2.29564931,0.25217036  
B,0.81446807,0.12030139,0.02412893  
O,1.49209269,-1.06430735,-0.15749239  
O,1.64771486,1.19583399,0.19132233  
C, .906436,-0.80861987,0.10523646  
C,3.00569291,0.7536261,-0.11233703  
C,3.28076057,1.15049297,-1.5667127  
H,3.13615692,2.22783547,-1.66954403  
H,4.30500335,0.91135195,-1.86284392  
H,2.59392996,0.6516048,-2.25355349  
C, 3.96859999,1.47754155,0.82307302  
H,4.99288462,1.12340296,0.67558007  
H, 3.94705346,2.54846814,0.60979204  
H,3.69691582,1.33696153,1.86894169  
C, 3.73636686,-1.6517051,-0.85713396  
H,4.80278845,-1.44218745,-0.73508387  
H,3.57478464,-2.71126356,-0.64638887  
H,3.46112649,-1.46807371,-1.89537792  
C,3.17081529,-1.23998361,1.55169768  
H,2.89713803,-2.29141534,1.66236107  
H,4.22518994,-1.13063551,1.81641896

H,2.5732425,-0.65923035,2.25732594  
Zero-point correction= 0.300216 (Hartree/Particle)  
Thermal correction to Energy= 0.316678  
Thermal correction to Enthalpy= 0.317622  
Thermal correction to Gibbs Free Energy= 0.256740  
Sum of electronic and zero-point Energies= -774.424229  
Sum of electronic and thermal Energies= -774.407767  
Sum of electronic and thermal Enthalpies= -774.406822  
Sum of electronic and thermal Free Energies= -774.467705

### **N-Bpinindole**

RB3LYP/6-311++G(d,p)

0,1

C,2.6540926477,-2.1657637622,-0.1448805939  
C,1.2964055254,-2.0975448963,-0.1437455496  
C,3.1506162812,-0.8159346229,-0.0496525255  
N,0.8691016553,-0.7659234809,-0.0546563081  
C,2.0194146977,0.0353767677,0.0051742709  
C,4.4355869565,-0.2576502937,-0.0028853702  
C,2.1446569491,1.4214769789,0.1069151173  
C,4.5646497371,1.1210814793,0.0975528384  
H,5.3133364168,-0.89349041,-0.0436019699  
H,1.2710867144,2.0579473081,0.1512303614  
C,3.4306229647,1.9499044434,0.1518571025  
H,5.5520134028,1.5675692948,0.1355097654  
H,3.5594678906,3.0235632216,0.231279007  
H,3.2414298721,-3.0691788442,-0.2053379355  
H,0.5609701004,-2.8839538281,-0.2002116303  
B,-0.5102727649,-0.3644733225,-0.0355011653  
O,-1.5329444588,-1.2733165296,-0.1433517341  
O,-0.9333854143,0.9326953322,0.0933042474  
C,-2.7712509466,-0.5604060057,0.1607355523  
C,-2.3757306508,0.938589933,-0.1495749029  
C,-3.8816082431,-1.1313198955,-0.7143599025  
H,-4.0589796561,-2.1743807824,-0.4433696799  
H,-4.8142228914,-0.580097977,-0.5649233867  
H,-3.6201277043,-1.0967887971,-1.7715597189  
C,-3.0769215452,-0.814557881,1.6405808685  
H,-4.024044296,-0.358179641,1.9374987207  
H,-3.1476783133,-1.8915524573,1.8057486164  
H,-2.28642554,-0.424717738,2.285337866  
C,-3.0109898953,1.9791418747,0.7658197308  
H,-2.6582592022,2.9745917233,0.4874501923  
H,-4.1000856646,1.9670691441,0.6679485908



H,-2.7516651906,1.8089067175,1.8103034153  
C,-2.5760675405,1.3269178428,-1.617838336  
H,-3.6365542789,1.4081071116,-1.8674365936  
H,-2.1059059273,2.2963330606,-1.794786928  
H,-2.1156704476,0.6002815518,-2.2905865825

Zero-point correction= 0.300362 (Hartree/Particle)  
Thermal correction to Energy= 0.316559  
Thermal correction to Enthalpy= 0.317503  
Thermal correction to Gibbs Free Energy= 0.257462  
Sum of electronic and zero-point Energies= -774.442396  
Sum of electronic and thermal Energies= -774.426199  
Sum of electronic and thermal Enthalpies= -774.425254  
Sum of electronic and thermal Free Energies= -774.485295

## 2-Bpinpyrrole

RB3LYP/6-311++G(d,p)  
0,1

C,-4.01275159,-0.71941641,-0.12730315  
C,-4.13968119,0.63922521,0.10184355  
C,-2.83050773,1.16904189,0.19615092  
C,-1.92233734,0.12971291,0.02424783  
N,-2.68192213,-1.01343824,-0.17130681  
H,-2.28667159,-1.9270853,-0.32627657  
H,-4.76284362,-1.4830134,-0.25999407  
H,-5.06995663,1.17871031,0.18966574  
H,-2.56147247,2.19957913,0.37072601  
B,-0.39338408,0.09264956,0.02102239  
O,0.31473742,-1.06371951,-0.23804327  
O,0.42178718,1.17016638,0.26794253  
C,1.71878348,-0.79750964,0.056196  
C,1.7871299,0.77688159,-0.0573935  
C,1.98104361,-1.31617089,1.47472443  
H,1.72988679,-2.37831393,1.51473347  
H,3.03046152,-1.20101128,1.75646846  
H,1.36442168,-0.79508383,2.21002742  
C,2.73289856,1.45700221,0.92742343  
H,3.76525375,1.1372008,0.75887086  
H,2.68697674,2.53917705,0.78693673  
H,2.46315513,1.24003774,1.96061426  
C,2.57702445,-1.55812093,-0.94942837  
H,3.63693582,-1.3292419,-0.8064396  
H,2.44165283,-2.63264978,-0.806325

H,2.30319484,-1.31697382,-1.97615843  
C,2.06279857,1.2724532,-1.48180727  
H,1.90097788,2.35181571,-1.51530696  
H,3.0922597,1.06914052,-1.78687595  
H,1.38754172,0.80836201,-2.20374786

Zero-point correction= 0.253664 (Hartree/Particle)  
Thermal correction to Energy= 0.267483  
Thermal correction to Enthalpy= 0.268427  
Thermal correction to Gibbs Free Energy= 0.213872  
Sum of electronic and zero-point Energies= -620.788950  
Sum of electronic and thermal Energies= -620.775131  
Sum of electronic and thermal Enthalpies= -620.774187  
Sum of electronic and thermal Free Energies= -620.828742

### **N-Bpinpyrrole**

RB3LYP/6-311++G(d,p)  
0,1

C,2.6874951,-1.10948725,-0.18756521  
C,3.99309839,-0.70640187,-0.11972379  
C,3.99314332,0.7063521,0.11955974  
C,2.68756511,1.10944593,0.18784121  
N,1.86857589,0.00003536,-0.00003184  
H,2.25358026,-2.08179494,-0.35276876  
H,4.85769411,-1.34311482,-0.22805511  
H,4.85778002,1.34303908,0.22771297  
H,2.25371667,2.08174948,0.35324931  
B,0.42877526,0.00007521,-0.00006303  
O,-0.31600878,1.1197891,0.25765409  
O,-0.31599632,-1.1197064,-0.25770575  
C,-1.70454421,0.78889708,-0.05720446  
C,-1.7044718,-0.78892409,0.05717317  
C,-2.6076473,-1.51017099,-0.93695786  
H,-2.51659566,-2.58930721,-0.79545338  
H,-3.65422413,-1.23521365,-0.77857974  
H,-2.33755202,-1.2807857,-1.96727528  
C,-1.96804774,-1.29521545,1.47915789  
H,-3.00775859,-1.13573321,1.77447987  
H,-1.76089183,-2.36664855,1.51611004  
H,-1.32087669,-0.80092686,2.20684771  
C,-2.60762543,1.51011721,0.9369919  
H,-2.51665839,2.58925943,0.79546613  
H,-3.65419397,1.23508935,0.77869389

H,-2.33743331,1.28077016,1.96729443

C,-1.96808867,1.2952183,-1.47916229

H,-3.00758099,1.13489095,-1.77480249

H,-1.7618422,2.36683363,-1.51586741

H,-1.32029058,0.80162195,-2.20676275

Zero-point correction= 0.253396 (Hartree/Particle)

Thermal correction to Energy= 0.267071

Thermal correction to Enthalpy= 0.268015

Thermal correction to Gibbs Free Energy= 0.213928

Sum of electronic and zero-point Energies= -620.804365

Sum of electronic and thermal Energies= -620.790690

Sum of electronic and thermal Enthalpies= -620.789746

Sum of electronic and thermal Free Energies= -620.843834

---

(i) Gaussian 09, Revision C.01, M. J. Frisch, G. W. Trucks, H. B. Schlegel, G. E. Scuseria,

M. A. Robb, J. R. Cheeseman, G. Scalmani, V. Barone, B. Mennucci, G. A. Petersson, H. Nakatsuji, M. Caricato, X. Li, H. P. Hratchian, A. F. Izmaylov, J. Bloino, G. Zheng, J. L. Sonnenberg, M. Hada, M. Ehara, K. Toyota, R. Fukuda, J. Hasegawa, M. Ishida, T. Nakajima, Y. Honda, O. Kitao, H. Nakai, T. Vreven, J. A. Montgomery, Jr., J. E. Peralta, F. Ogliaro, M. Bearpark, J. J. Heyd, E. Brothers, K. N. Kudin, V. N. Staroverov, T. Keith, R. Kobayashi, J. Normand, K. Raghavachari, A. Rendell, J. C. Burant, S. S. Iyengar, J. Tomasi, M. Cossi, N. Rega, J. M. Millam, M. Klene, J. E. Knox, J. B. Cross, V. Bakken, C. Adamo, J. Jaramillo, R. Gomperts, R. E. Stratmann, O. Yazyev, A. J. Austin, R. Cammi, C. Pomelli, J. W. Ochterski, R. L. Martin, K. Morokuma, V. G. Zakrzewski, G. A. Voth, P. Salvador, J. J. Dannenberg, S. Dapprich, A. D. Daniels, O. Farkas, J. B. Foresman, J. V. Ortiz, J. Cioslowski, and D. J. Fox, Gaussian, Inc., Wallingford CT, 2010.
